# Supplementary material
Source: PubMed Central journal article supplement (PMC3826562)
Supplement: NIHMS523183-supplement-Supporting_Information.pdf [file NIHMS523183-supplement-Supporting_Information.pdf]

## Supporting Information

|                                                                       |         |
|-----------------------------------------------------------------------|---------|
| Part 1. Experimental Procedures                                       | S2–S12  |
| Part 2. $^1\text{H}$ and $^{13}\text{C}$ NMR spectra of new compounds | S13–S48 |
| Part 3. Gas chromatograms of unpurified reaction mixtures             | S49–S58 |

## Part 1. Experimental Procedures

### General Experimental Procedures

All reactions were carried out in dry glassware under an argon atmosphere using standard Schlenk techniques or in a Vacuum Atmospheres Glovebox under a nitrogen atmosphere, unless otherwise specified. All solvents were purified by passage through solvent purification columns and further degassed by bubbling argon. NMR solvents were dried over CaH<sub>2</sub> and vacuum transferred to a dry Schlenk flask and subsequently degassed with bubbling argon. C<sub>6</sub>D<sub>6</sub> was purified by passage through a solvent purification column. CDCl<sub>3</sub> was used as received. All  $\alpha$ -olefins were filtered through a plug of basic alumina prior to use. Ruthenium complexes **1**, **2**, **5**, and **6** were obtained from Materia Inc. Dienes **13a**,<sup>1</sup> and **13c**,<sup>2</sup> **13d**,<sup>3</sup> **13e**,<sup>4</sup> and **13f**<sup>5</sup> were prepared according to their previously reported procedures. Other commercially available reagents and silica gel were used as received.

<sup>1</sup>H NMR spectra were acquired at 500 MHz and <sup>13</sup>C NMR spectra at 125 MHz as CDCl<sub>3</sub> solutions unless otherwise noted. High-resolution mass spectra (HRMS) were provided by the California Institute of Technology Mass Spectrometry Facility using a JEOL JMS-600H High Resolution Mass Spectrometer. All HRMS were by positive-ion EI or ESI. Gas chromatography data was obtained using an Agilent 6850 FID gas chromatography system equipped with a HP-5 (5%-phenyl)-methylpolysiloxane capillary column (length: 30 m, diameter: 0.25 mm, film: 0.25  $\mu$ m) (Agilent). Temperature gradient: 50 °C for 2 min; 21 °C/min to 300 °C; 300 °C for 3 min).

- (1) Trost, B. M.; Conway, W. P.; Strege, P. E.; Dietsche, T. J. *J. Am. Chem. Soc.* **1974**, *96*, 7165–7167.
- (2) Ryu, J.-S.; Marks, T. J.; McDonald, F. E. *J. Org. Chem.* **2004**, *69*, 1038–1052.
- (3) Ranu, B. C.; Majee, A. *Chem. Commun.* **1997**, 1225–1226.
- (4) Ishikura, M.; Kato, H. *Tetrahedron* **2002**, *58*, 9827–9838.
- (5) Hodgson, D. M.; Fleming, M. J.; Stanway, S. J. *J. Am. Chem. Soc.* **2004**, *126*, 12250–12251.

## General Procedure for Reaction with *trans*-1,4-hexadiene.

### (*Z,E*)-8,10-tridecadien-1-ol (**12a**).

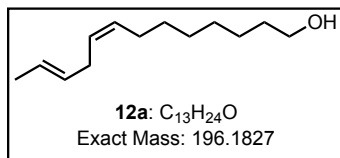

In a glovebox, a 4 mL vial was charged with 28 mg (0.20 mmol) of 8-nonen-1-ol. *Trans*-1,4-pentadiene (0.20 mL) and THF (0.16 mL) were added, followed by a solution of catalyst **6** (40  $\mu$ L of a 0.05M THF stock solution, 0.002 mmol). The resulting solution was stirred in an open vial for 5 h before being removed from the glovebox and quenched with excess ethyl vinyl ether (~0.1 mL). The solvent was removed *in vacuo* and the residue purified by column chromatography (SiO<sub>2</sub>; 0% to 25% EtOAc in hexane) to provide 31 mg (80%) of diene **12a** as a clear, colorless oil; <sup>1</sup>H NMR (500 MHz, CDCl<sub>3</sub>)  $\delta$  5.49 – 5.32 (m, 4H), 3.63 (t, *J* = 6.7 Hz, 2H), 2.71 (appt, *J* = 6.3, Hz, 2H), 2.03 (appq, *J* = 7.9 Hz, 2H), 1.65 (dt, *J* = 4.5, 1.3 Hz, 3H), 1.60 – 1.52 (m, 3H), 1.40 – 1.27 (m, 8H); <sup>13</sup>C NMR (126 MHz, CDCl<sub>3</sub>)  $\delta$  130.54, 129.79, 127.89, 125.28, 63.22, 32.95, 30.63, 29.77, 29.49, 29.41, 27.26, 25.91, 18.10; HRMS (EI) *m/z* calcd for C<sub>13</sub>H<sub>24</sub>O (M<sup>+</sup>) 196.1827, found 196.1825.

### (*Z,E*)-1-phenyl-2,5-heptadiene (**12b**)

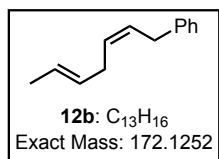

Following the procedure for **12a**, **12b** was obtained as 56 mg of a 4:1 molar (63% **12b**) mixture with (*E,Z,E*)-2,5,8-pentatriene when allyl benzene (24 mg, 0.20 mmol) was reacted with catalyst **6** (40  $\mu$ L of a 0.05M THF stock solution, 0.002 mmol) in 1:1 *trans*-1,4-hexadiene:THF (0.4 mL); <sup>1</sup>H NMR (300 MHz, CDCl<sub>3</sub>)  $\delta$  7.36 – 7.28 (m, 2H), 7.26 – 7.18 (m, 3H), 5.58 – 5.38 (m, 4H), 3.45 (d, *J* = 6.8 Hz, 2H), 2.89 (ddt, *J* = 6.3, 3.0, 1.5 Hz, 2H), 1.74 – 1.66 (m, 3H).

### (*Z,E*)-10,13-pentadecadienal (**12c**)

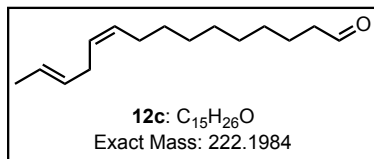

Following the procedure for **12a**, **12c** (31 mg, 70%) was obtained as a clear, colorless oil when undecenal (33 mg, 0.20 mmol) was reacted with catalyst **6** (40  $\mu$ L of a 0.05M THF stock solution, 0.002 mmol) in 1:1 *trans*-1,4-hexadiene:THF (0.4 mL); <sup>1</sup>H NMR (500 MHz, CDCl<sub>3</sub>)  $\delta$  9.77 (t, *J* = 1.9 Hz, 1H), 5.50 – 5.32 (m, 4H), 2.72 (ddd, *J* = 6.8, 5.0, 1.6 Hz, 2H), 2.42 (td, *J* = 7.4, 1.9 Hz, 2H), 2.03 (q, *J* = 6.8 Hz, 2H), 1.65 (dt, *J* = 4.6, 1.3 Hz, 3H), 1.62 (q, *J* = 7.3 Hz, 2H), 1.37 – 1.24 (m, 10H); <sup>13</sup>C NMR (126 MHz, CDCl<sub>3</sub>)  $\delta$  203.10, 130.55, 129.80, 127.89, 125.28, 44.12, 30.64, 29.81, 29.53, 29.49, 29.38, 29.35, 27.27, 22.28, 18.11; HRMS (EI) *m/z* calcd for C<sub>15</sub>H<sub>26</sub>O (M<sup>+</sup>) 222.1984, found 222.1976.

### (*Z,E*)-deca-5,8-dien-2-one (**12d**).

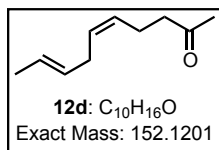

Following the procedure of **12a**, **12d** (15 mg, 49%) was obtained as a clear, colorless oil when 5-hexen-2-one (20 mg, 0.20 mmol) was reacted with catalyst **6** (40  $\mu$ L of a 0.05M THF stock solution, 0.002 mmol) in 1:1 *trans*-1,4-hexadiene:THF (0.4 mL); <sup>1</sup>H NMR (500 MHz, CDCl<sub>3</sub>)  $\delta$  5.51 – 5.31 (m, 4H), 2.73 (tdd, *J* = 5.7, 3.2, 1.4 Hz, 2H), 2.48 (t, *J* = 7.4 Hz, 2H), 2.31 (q, *J* = 7.3 Hz, 2H), 2.14 (s, 3H), 1.68 – 1.62 (m, 3H); <sup>13</sup>C NMR (126 MHz, CDCl<sub>3</sub>)  $\delta$  208.6, 129.4, 129.2, 128.4, 125.6, 43.7, 30.6, 30.2, 21.8, 18.1; HRMS (EI) *m/z* calcd for C<sub>10</sub>H<sub>16</sub>O (M<sup>+</sup>) 152.1201, found 152.1164.

### methyl (*Z,E*)-9,12-tetradecadienoate (**12e**)

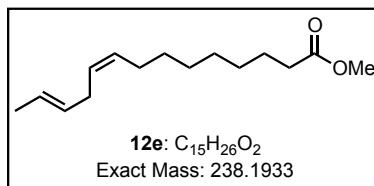

Following the procedure for **12a**, **12e** (39 mg, 82%) was obtained as a clear, colorless oil when methyl 10-undecenoate (39 mg,

0.20 mmol) was reacted with catalyst **6** (40  $\mu$ L of a 0.05M THF stock solution, 0.002 mmol) in 1:1 *trans*-1,4-hexadiene:THF (0.4 mL);  $^1\text{H}$  NMR (500 MHz,  $\text{CDCl}_3$ )  $\delta$  5.51 – 5.32 (m, 4H), 3.67 (s, 3H), 2.71 (tt,  $J = 5.1, 1.1$  Hz, 2H), 2.33 – 2.27 (m, 2H), 2.06 – 1.99 (m, 2H), 1.65 (dt,  $J = 4.5, 1.2$  Hz, 3H), 1.64 – 1.57 (m, 2H), 1.38 – 1.24 (m, 8H);  $^{13}\text{C}$  NMR (126 MHz,  $\text{CDCl}_3$ )  $\delta$  174.49, 130.52, 129.79, 127.89, 125.28, 51.63, 34.30, 30.63, 29.77, 29.33, 29.32, 29.26, 27.25, 25.14, 18.10; HRMS (EI)  $m/z$  calcd for  $\text{C}_{15}\text{H}_{26}\text{O}_2$  ( $\text{M}^+$ ) 238.1933, found 238.1932.

#### phenyl (*Z,E*)-2,5-heptadien-1-ylamine (**12f**)

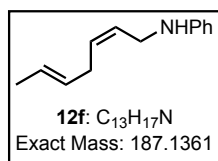

Following the procedure for **12a**, **12f** (25 mg, 68%) was obtained as a clear, colorless oil when *N*-allyl aniline (27 mg, 0.20 mmol) was reacted with catalyst **6** (40  $\mu$ L of a 0.05M THF stock solution, 0.002 mmol) in 1:1 *trans*-1,4-hexadiene:THF (0.4 mL);  $^1\text{H}$  NMR (500 MHz,  $\text{CDCl}_3$ )  $\delta$  7.21 (dd,  $J = 8.6, 7.4$  Hz, 2H), 6.74 (tt,  $J = 7.3, 1.1$  Hz, 1H), 6.64 (dd,  $J = 8.6, 1.1$  Hz, 2H), 5.66 – 5.57 (m, 2H), 5.57 – 5.42 (m, 2H), 3.81 – 3.77 (m, 2H), 3.65 (bs, 1H), 2.84 (tdd,  $J = 4.7, 2.6, 1.2$  Hz, 2H), 1.70 (dd,  $J = 6.1, 1.2$  Hz, 3H);  $^{13}\text{C}$  NMR (126 MHz,  $\text{CDCl}_3$ )  $\delta$  148.20, 130.94, 129.21, 128.71, 127.24, 125.82, 117.49, 112.96, 41.03, 30.71, 17.93. HRMS (EI)  $m/z$  calcd for  $\text{C}_{13}\text{H}_{17}\text{N}$  ( $\text{M}^+$ ) 187.1361, found 187.1331.

#### *tert*-butyl (*Z,E*)-hepta-2,5-dien-1-ylcarbamate (**12g**)

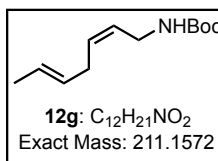

Following the procedure for **12a**, **12g** (23 mg, 54%) was obtained as a clear, colorless oil when *tert*-butyl allylcarbamate (31 mg, 0.20 mmol) was reacted with catalyst **6** (40  $\mu$ L of a 0.05M THF stock solution, 0.002 mmol) in 1:1 *trans*-1,4-hexadiene:THF (0.4 mL);  $^1\text{H}$  NMR (500 MHz,  $\text{CDCl}_3$ )  $\delta$  5.52 (dddd,  $J = 12.7, 8.4, 7.1, 5.6$  Hz, 1H), 5.48 – 5.35 (m, 3H), 4.49 (bs, 1H), 3.82 – 3.72 (m, 2H), 2.80 – 2.72 (m, 2H), 1.69 – 1.62 (m, 3H), 1.45 (s, 9H);  $^{13}\text{C}$  NMR (126 MHz,  $\text{CDCl}_3$ )  $\delta$  156.00, 131.21, 128.87, 126.51,

126.00, 79.49, 37.75, 30.65, 28.63, 18.09; HRMS (ESI)  $m/z$  calcd for  $C_{12}H_{21}NO_2Na$  ( $M + Na^+$ ) 234.1470, found 234.1451.

**(*Z,E*)-hepta-2,5-dien-1-yl methyl carbonate (12h).**

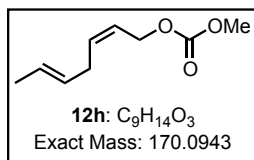

Following the procedure of **12a**, **12h** (27 mg, 79%) was obtained as a clear, colorless oil when allyl methyl carbonate (23 mg, 0.20 mmol) was reacted with catalyst **6** (40  $\mu$ L of a 0.05M THF stock solution, 0.002 mmol) in 1:1 *trans*-1,4-hexadiene:THF (0.4 mL);  $^1H$  NMR (500 MHz,  $CDCl_3$ )  $\delta$  5.68 (dtt,  $J = 10.9, 7.3, 1.2$  Hz, 1H), 5.59 (dtt,  $J = 10.9, 6.8, 1.4$  Hz, 1H), 5.52 – 5.35 (m, 2H), 4.69 (ddt,  $J = 6.7, 1.1, 0.6$  Hz, 2H), 3.79 (s, 3H), 2.81 (appt,  $J = 7.6$  Hz, 2H), 1.66 (dq,  $J = 6.2, 1.4$  Hz, 3H);  $^{13}C$  NMR (126 MHz,  $CDCl_3$ )  $\delta$  156.0, 134.0, 128.4, 126.4, 123.3, 63.8, 54.9, 30.9, 18.1; HRMS (EI)  $m/z$  calcd for  $C_9H_{14}O_3$  ( $M^+$ ) 170.0943, found 170.0921.

**2-((*Z,E*)-hepta-2,5-dien-1-yl)-4,4,5,5-tetramethyl-1,3,2-dioxaborolane (12i)**

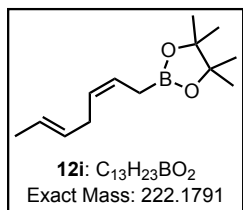

Following the procedure for **12a**, **12i** (29 mg, 65%) was obtained as a clear, colorless oil when allyl pinacolboronate (34 mg, 0.20 mmol) was reacted with catalyst **6** (40  $\mu$ L of a 0.05M THF stock solution, 0.002 mmol) in 1:1 *trans*-1,4-hexadiene:THF (0.4 mL);  $^1H$  NMR (500 MHz,  $CDCl_3$ )  $\delta$  5.54 (dtt,  $J = 11.0, 7.9, 1.6$  Hz, 1H), 5.50 – 5.35 (m, 3H), 2.75 – 2.68 (m, 2H), 1.68 (d,  $J = 7.0$  Hz, 2H), 1.64 (d,  $J = 4.7$  Hz, 3H), 1.25 (s, 12H);  $^{13}C$  NMR (126 MHz,  $cdcl_3$ )  $\delta$  129.71, 127.89, 125.17, 124.92, 83.42, 30.46, 24.96, 18.10; HRMS (EI)  $m/z$  calcd for  $C_{13}H_{22}O_2B$  ( $M^+$ ) 221.1713, found 221.1715.

**(*Z,E*)-undeca-6,9-dien-1-ol (12q)**

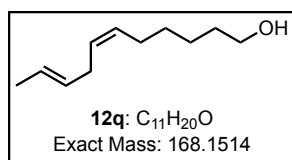

Following the procedure for **12a**, **12q** (22 mg, 65%) was obtained as a clear, colorless oil when *cis*-6-nonen-1-ol (28 mg, 0.20 mmol) was

reacted with catalyst **6** (40  $\mu$ L of a 0.05M THF stock solution, 0.002 mmol) in 1:1 *trans*-1,4-hexadiene:THF (0.4 mL);  $^1\text{H}$  NMR (500 MHz,  $\text{CDCl}_3$ )  $\delta$  5.52 – 5.29 (m, 4H), 3.65 (t,  $J = 6.7$  Hz, 2H), 2.76 – 2.69 (m, 2H), 2.06 (q,  $J = 6.1$  Hz, 2H), 1.66 (d,  $J = 5.5$  Hz, 3H), 1.59 (p,  $J = 6.7$  Hz, 3H), 1.38 (dd,  $J = 6.9, 3.6$  Hz, 4H);  $^{13}\text{C}$  NMR (126 MHz,  $\text{CDCl}_3$ )  $\delta$  130.08, 129.52, 127.88, 125.13, 63.01, 32.66, 30.43, 29.40, 27.02, 25.34, 17.91; HRMS (EI)  $m/z$  calcd for  $\text{C}_{11}\text{H}_{20}\text{O}$  ( $\text{M}^+$ ) 168.1514, found 168.1522.

### General procedure for the reaction with 1-decene.

#### methyl (*E,Z*)-2,12-henicosadienoate (**12j**)

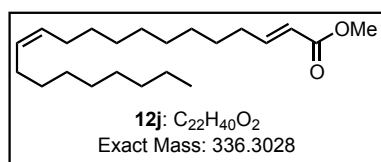

In a glovebox, diene methyl *E*-2,12-tridecadienoate (**13a**, 40 mg, 0.20 mmol) was dissolved in THF (0.16 mL) and 1-decene (0.2 mL). A solution of catalyst **6** (40  $\mu$ L of a 0.05M THF stock solution, 0.002 mmol) was added and the reaction was maintained at room temperature in an open vial for 5 h. The solution was then removed from the glovebox and quenched with ethyl vinyl ether (~0.1 mL). The reaction mixture was concentrated *in vacuo* and purified by column chromatography ( $\text{SiO}_2$ , 0% to 25% EtOAc in hexanes) to provide 54 mg (80%) of diene **12j** as a clear, colorless oil;  $^1\text{H}$  NMR (500 MHz,  $\text{CDCl}_3$ )  $\delta$  6.98 (dt,  $J = 15.6, 7.0$  Hz, 1H), 5.82 (dt,  $J = 15.6, 1.6$  Hz, 1H), 5.40 – 5.30 (m, 2H), 3.73 (s, 3H), 2.20 (qd,  $J = 7.1, 1.6$  Hz, 2H), 2.02 (td,  $J = 6.9, 5.4$  Hz, 5H), 1.49 – 1.40 (m, 2H), 1.38 – 1.21 (m, 21H), 0.88 (appt,  $J = 7.0$  Hz, 3H);  $^{13}\text{C}$  NMR (126 MHz,  $\text{CDCl}_3$ )  $\delta$  167.6, 150.3, 130.4, 130.3, 121.3, 51.8, 32.7, 32.4, 30.2, 30.2, 30.0, 29.9, 29.8, 29.80, 29.79, 29.7, 29.6, 28.5, 27.7, 27.7, 23.2, 14.6; HRMS (EI)  $m/z$  calcd for  $\text{C}_{22}\text{H}_{40}\text{O}_2$  ( $\text{M}^+$ ) 336.3028, found 336.3026.

#### (*E,Z*)-2,12-henicosadien-1-ol (**12k**)

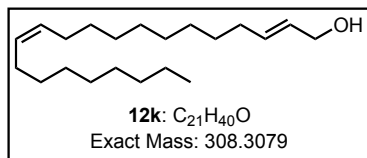

Following the general procedure for **12j**, **12k** (37 mg, 60%) was obtained as a clear, colorless oil when *E*-2,12-tridecadien-1-ol (34 mg, 0.20 mmol) was reacted with catalyst **6** (40  $\mu$ L of a 0.05M

THF stock solution, 0.002 mmol) in 1:1 1-decene:THF (0.4 mL); <sup>1</sup>H NMR (500 MHz, CDCl<sub>3</sub>)  $\delta$  5.74 – 5.60 (m, 2H), 5.40 – 5.32 (m, 2H), 4.09 (t, *J* = 4.5 Hz, 2H), 2.08 – 1.99 (m, 6H), 1.43 – 1.22 (m, 25H), 0.89 (t, *J* = 7.0 Hz, 3H); <sup>13</sup>C NMR (126 MHz, cdcl<sub>3</sub>)  $\delta$  133.8, 130.1, 130.1, 129.0, 64.1, 32.4, 32.1, 30.0, 30.0, 29.7, 29.7, 29.7, 29.5, 29.5, 29.5, 29.4, 29.4, 27.4, 27.4, 22.9, 14.3; HRMS (EI) *m/z* calcd for C<sub>21</sub>H<sub>40</sub>O (M<sup>+</sup>) 308.3079, found 308.3066.

#### (*E,Z*)-2,6-pentadecadien-1-ol (**12l**)

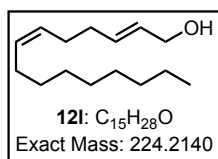

Following the general procedure for **12j**, **12l** (23 mg, 51%) was obtained as a clear, colorless oil when *E*-2,6-heptadiene-1-ol (22 mg, 0.20 mmol) was reacted with catalyst **6** (40  $\mu$ L of a 0.05M THF stock solution, 0.002 mmol) in

1:1 1-decene:THF (0.4 mL); <sup>1</sup>H NMR (500 MHz, CDCl<sub>3</sub>)  $\delta$  5.76 – 5.63 (m, 2H), 5.43 – 5.31 (m, 2H), 4.09 (d, *J* = 5.1 Hz, 2H), 2.17 – 2.07 (m, 4H), 2.02 (q, *J* = 7.0 Hz, 2H), 1.37 – 1.22 (m, 13H), 0.89 (appt, *J* = 7.0 Hz, 3H); <sup>13</sup>C NMR (126 MHz, CDCl<sub>3</sub>)  $\delta$  133.01, 130.83, 129.43, 128.84, 63.98, 32.52, 32.11, 29.90, 29.73, 29.54, 29.52, 27.49, 27.03, 22.89, 14.32; HRMS (EI) *m/z* calcd for C<sub>15</sub>H<sub>28</sub>O (M<sup>+</sup>) 224.2140, found 224.2144.

#### (*Z*)-12-methyltrideca-8,12-dien-1-ol (**15**)

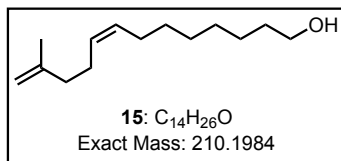

In a glovebox, 2-methyl-1,5-hexadiene (**14**, 19 mg, 0.20 mmol) and 8-nonen-1-ol (**9a**, 142 mg, 1.0 mmol) was dissolved in THF (0.16 mL). A solution of catalyst **6** (40  $\mu$ L of a 0.05M THF stock

solution, 0.002 mmol) was added and the reaction was maintained at room temperature in an open vial for 5 h. The solution was then removed from the glovebox and quenched with ethyl



vinyl ether (~0.1 mL). The reaction mixture was concentrated *in vacuo* and purified by column chromatography (SiO<sub>2</sub>, 0% to 25% EtOAc in hexanes) to provide 19 mg (45%) of diene **15** as a clear, colorless oil; <sup>1</sup>H NMR (500 MHz, CDCl<sub>3</sub>) δ 5.42 – 5.32 (m, 2H), 4.75 – 4.68 (m, 2H), 3.65 (td, *J* = 6.6, 4.0 Hz, 2H), 2.22 – 2.15 (m, 2H), 2.10 – 2.01 (m, 4H), 1.76 – 1.72 (m, 3H), 1.57 (app, *J* = 6.7 Hz, 2H), 1.41 – 1.29 (m, 9H); <sup>13</sup>C NMR (126 MHz, CDCl<sub>3</sub>) δ 145.9, 130.4, 129.4, 110.1, 63.3, 38.0, 33.0, 29.9, 29.5, 29.5, 27.4, 25.9, 25.7, 22.7; HRMS (EI) *m/z* calcd for C<sub>14</sub>H<sub>26</sub>O (M<sup>+</sup>) 210.1984, found 210.1994.

#### methyl (*Z,Z*)-henciosa-2,12-dienoate (**12p**)

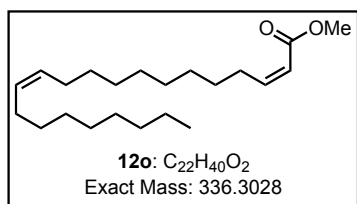

In a glovebox, methyl (*Z*)-2,12-tridecadienoate (**13g**, 40 mg, 0.20 mmol) was dissolved in THF (0.16 mL) and 1-decene (0.2 mL). A solution of catalyst **6** (40 μL of a 0.05M THF stock solution, 0.002 mmol) in THF (40 μL) was added and the reaction was maintained at room temperature in an open vial for 5 h. The solution was then removed from the glovebox and quenched with ethyl vinyl ether (~0.1 mL). The reaction mixture was concentrated *in vacuo* and purified by column chromatography (SiO<sub>2</sub>, 0% to 10% EtOAc in hexanes) to provide 53 mg (79%) of diene **12p** as a clear, colorless oil; <sup>1</sup>H NMR (500 MHz, CDCl<sub>3</sub>) δ 6.23 (dt, *J* = 11.5, 7.5 Hz, 1H), 5.77 (dt, *J* = 11.5, 1.7 Hz, 1H), 5.40 – 5.30 (m, 2H), 3.71 (s, 3H), 2.65 (qd, *J* = 7.5, 1.7 Hz, 2H), 2.02 (td, *J* = 6.7, 4.8 Hz, 4H), 1.48 – 1.40 (m, 2H), 1.38 – 1.21 (m, 22H), 0.88 (appt, *J* = 7.0 Hz, 3H). <sup>13</sup>C NMR (126 MHz, CDCl<sub>3</sub>) δ 167.1, 151.3, 130.13, 130.05, 119.3, 51.2, 32.1, 30.00, 29.98, 29.8, 29.7, 29.63, 29.55, 29.54, 29.52, 29.49, 29.25, 29.24, 27.43, 27.42, 22.9, 14.3; HRMS (EI) *m/z* calcd for C<sub>22</sub>H<sub>40</sub>O<sub>2</sub> (M<sup>+</sup>) 336.3028, found 336.3025.

#### Synthesis of new diene substrates.

##### methyl (*Z*)-2,12-tridecadienoate (**13g**)

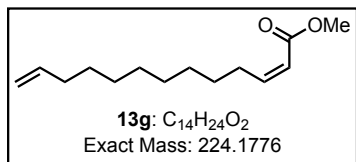

Methyl *P,P*-bis(2,2,2-trifluoroethyl)phosphonoacetate (2.3 mL, 10.7 mmol) and 18-crown-6 (11.3 g, 42.8 mmol) were dissolved in THF (90 mL) and cooled to 0 °C. Potassium

bis(trimethylsilyl)amide (2.1 g, 10.7 mmol) was added and the mixture was stirred at 0 °C for 30 minutes before addition of 10-undecenal. The solution was allowed to warm to room temperature for 2 h. The solution was then poured into saturated aqueous ammonium chloride (50 mL) and extracted with diethyl ether (3×50 mL). The combined organic layers were dried over anhydrous sodium sulfate, filtered, concentrated and purified by column chromatography (SiO<sub>2</sub>, 2% ether in pentane) to provide 1.3 g (66%) of diene **13g** as a clear, colorless oil; <sup>1</sup>H NMR (500 MHz, CDCl<sub>3</sub>) δ 6.23 (dt, *J* = 11.5, 7.5 Hz, 1H), 5.86 – 5.74 (m, 2H), 4.99 (ddt, *J* = 17.1, 2.2, 1.6 Hz, 1H), 4.93 (ddt, *J* = 10.2, 2.3, 1.2 Hz, 1H), 3.71 (s, 3H), 2.65 (qd, *J* = 7.5, 1.7 Hz, 2H), 2.04 (dt, *J* = 8.1, 6.7, 1.4 Hz, 2H), 1.48 – 1.24 (m, 12H); <sup>13</sup>C NMR (126 MHz, CDCl<sub>3</sub>) δ 167.1, 151.3, 139.4, 119.3, 114.3, 51.2, 34.0, 29.60, 29.57, 29.49, 29.30, 29.22, 29.21, 29.13; HRMS (EI) *m/z* calcd for C<sub>14</sub>H<sub>24</sub>O<sub>2</sub> (M<sup>+</sup>) 224.1776, found 224.1783.

**(*E,Z*)-2,12-tridecadien-1-ol (13b).**

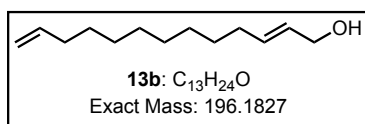

Methyl (*E*)-2,12-tridecadienoate (**13a**, 1.0 g, 4.46 mmol) was dissolved in THF (23 mL) and cooled to 0 °C.

Diisobutylaluminum hydride (2.0 mL, 11.1 mmol) was added dropwise. The solution was allowed to warm to ambient temperature. After 1.5 h, methanol (5 mL) was slowly added. The solution was then poured into saturated aqueous ammonium chloride (25 mL) and extracted with diethyl ether (3×30 mL). The combined organic layers were dried over anhydrous sodium sulfate, filtered, concentrated and purified by column chromatography (SiO<sub>2</sub>, 25% EtOAc in hexanes) to provide 0.84 g (96%) of **13b** as a clear, colorless oil; <sup>1</sup>H NMR (500 MHz, CDCl<sub>3</sub>) δ

5.82 (ddt,  $J = 16.9, 10.2, 6.7$  Hz, 1H), 5.74 – 5.60 (m, 2H), 5.00 (dq,  $J = 17.1, 1.8$  Hz, 1H), 4.93 (ddt,  $J = 10.2, 2.3, 1.3$  Hz, 1H), 4.09 (dd,  $J = 5.4, 1.2$  Hz, 2H), 2.04 (tdd,  $J = 7.9, 5.9, 1.4$  Hz, 4H), 1.42 – 1.33 (m, 6H), 1.28 (d,  $J = 3.0$  Hz, 7H);  $^{13}\text{C}$  NMR (126 MHz,  $\text{CDCl}_3$ )  $\delta$  139.4, 133.8, 129.0, 114.3, 64.1, 34.0, 32.4, 29.6, 29.4, 29.3, 29.1; HRMS (EI)  $m/z$  calcd for  $\text{C}_{13}\text{H}_{24}\text{O}$  ( $\text{M}^+$ ) 196.1827, found 196.1825.

**(*E*)-trideca-2,12-dien-1-yl pent-4-enoate (17)**

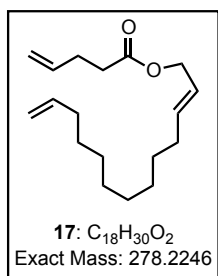

Alcohol **13b** (74 mg, 0.38 mmol) was dissolved in dichloromethane (3.8 mL) with 4-pentenoic acid (58  $\mu\text{L}$ , 0.57 mmol), triethylamine (0.2 mL, 1.5 mmol), and 4-(dimethylamino)pyridine (2 mg, 0.019 mmol). *N*-(3-Dimethylaminopropyl)-*N'*-ethylcarbodiimide hydrochloride (108 mg, 0.57 mmol) was added and the solution was maintained at room temperature for 5 h. The solution was then poured into saturated aqueous ammonium chloride (5 mL) and extracted with dichloromethane (3  $\times$  5 mL). The combined organic layers were dried over anhydrous sodium sulfate, filtered, concentrated and chromatographed ( $\text{SiO}_2$ , 10% EtOAc in hexanes) to provide 60 mg (57%) of triene **17** as a clear, colorless oil;  $^1\text{H}$  NMR (500 MHz,  $\text{CDCl}_3$ )  $\delta$  5.88 – 5.73 (m, 3H), 5.60 – 5.52 (m, 1H), 5.07 (dq,  $J = 17.2, 1.6$  Hz, 1H), 5.03 – 5.01 (m, 1H), 5.01 – 4.97 (m, 1H), 4.94 (ddt,  $J = 10.2, 2.3, 1.2$  Hz, 1H), 4.53 (dq,  $J = 6.5, 1.0$  Hz, 2H), 2.46 – 2.35 (m, 4H), 2.04 (dddd,  $J = 10.5, 6.7, 2.9, 1.6$  Hz, 4H), 1.38 (p,  $J = 6.8$  Hz, 4H), 1.33 – 1.24 (m, 8H);  $^{13}\text{C}$  NMR (126 MHz,  $\text{CDCl}_3$ )  $\delta$  173.1, 139.4, 136.9, 136.9, 123.9, 115.7, 114.3, 65.5, 34.0, 33.8, 32.5, 29.6, 29.6, 29.4, 29.3, 29.1, 29.1, 29.1; HRMS  $m/z$  calcd for  $\text{C}_{18}\text{H}_{30}\text{O}_2$  ( $\text{M}^+$ ) 278.2246, found 278.2233.

**(Z,E)-oxacycloheptadeca-5,15-dien-2-one (18)**

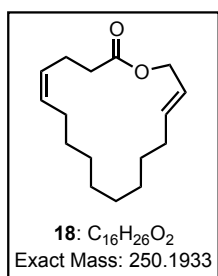

In a glovebox, triene **17** (15 mg, 0.054 mmol) was dissolved in 1,2-dichloroethane (17 mL) in a Schlenk tube. A solution of ruthenium catalyst **2** (2.6 mg, 0.040 mmol) in 1,2-dichloroethane (1 mL) was added, the reaction vessel was sealed, removed from the glovebox, and subjected to a single freeze/pump/thaw cycle. The flask was kept under a static vacuum of *ca* 100 mTorr and heated to 60 °C. After 24 hours, the mixture was cooled, quenched with excess ethyl vinyl ether, concentrated. The crude oil was chromatographed (SiO<sub>2</sub>, 2% Et<sub>2</sub>O in pentane) to provide 3 mg (22%) of macrolactone **18** as a clear, colorless oil; <sup>1</sup>H NMR (500 MHz, CDCl<sub>3</sub>) δ 5.72 (dtt, *J* = 15.2, 7.0, 1.1 Hz, 1H), 5.57 (dtt, *J* = 15.4, 6.5, 1.3 Hz, 1H), 5.47 – 5.33 (m, 2H), 4.53 (dq, *J* = 6.4, 0.9 Hz, 2H), 2.44 – 2.36 (m, 4H), 2.12 – 2.01 (m, 4H), 1.47 – 1.38 (m, 2H), 1.37 – 1.18 (m, 10H); <sup>13</sup>C NMR (126 MHz, CDCl<sub>3</sub>) δ 173.1, 136.9, 131.6, 128.2, 125.1, 65.0, 35.1, 31.1, 28.8, 28.7, 28.1, 27.8, 27.6, 27.2, 26.5, 23.2; HRMS *m/z* calcd for C<sub>16</sub>H<sub>26</sub>O<sub>2</sub> (M<sup>+</sup>) 250.1933, found 250.1929.

**Part 2. Spectral data of new compounds: <sup>1</sup>H NMR (500 MHz, CDCl<sub>3</sub>) spectrum of compound **12a**.**

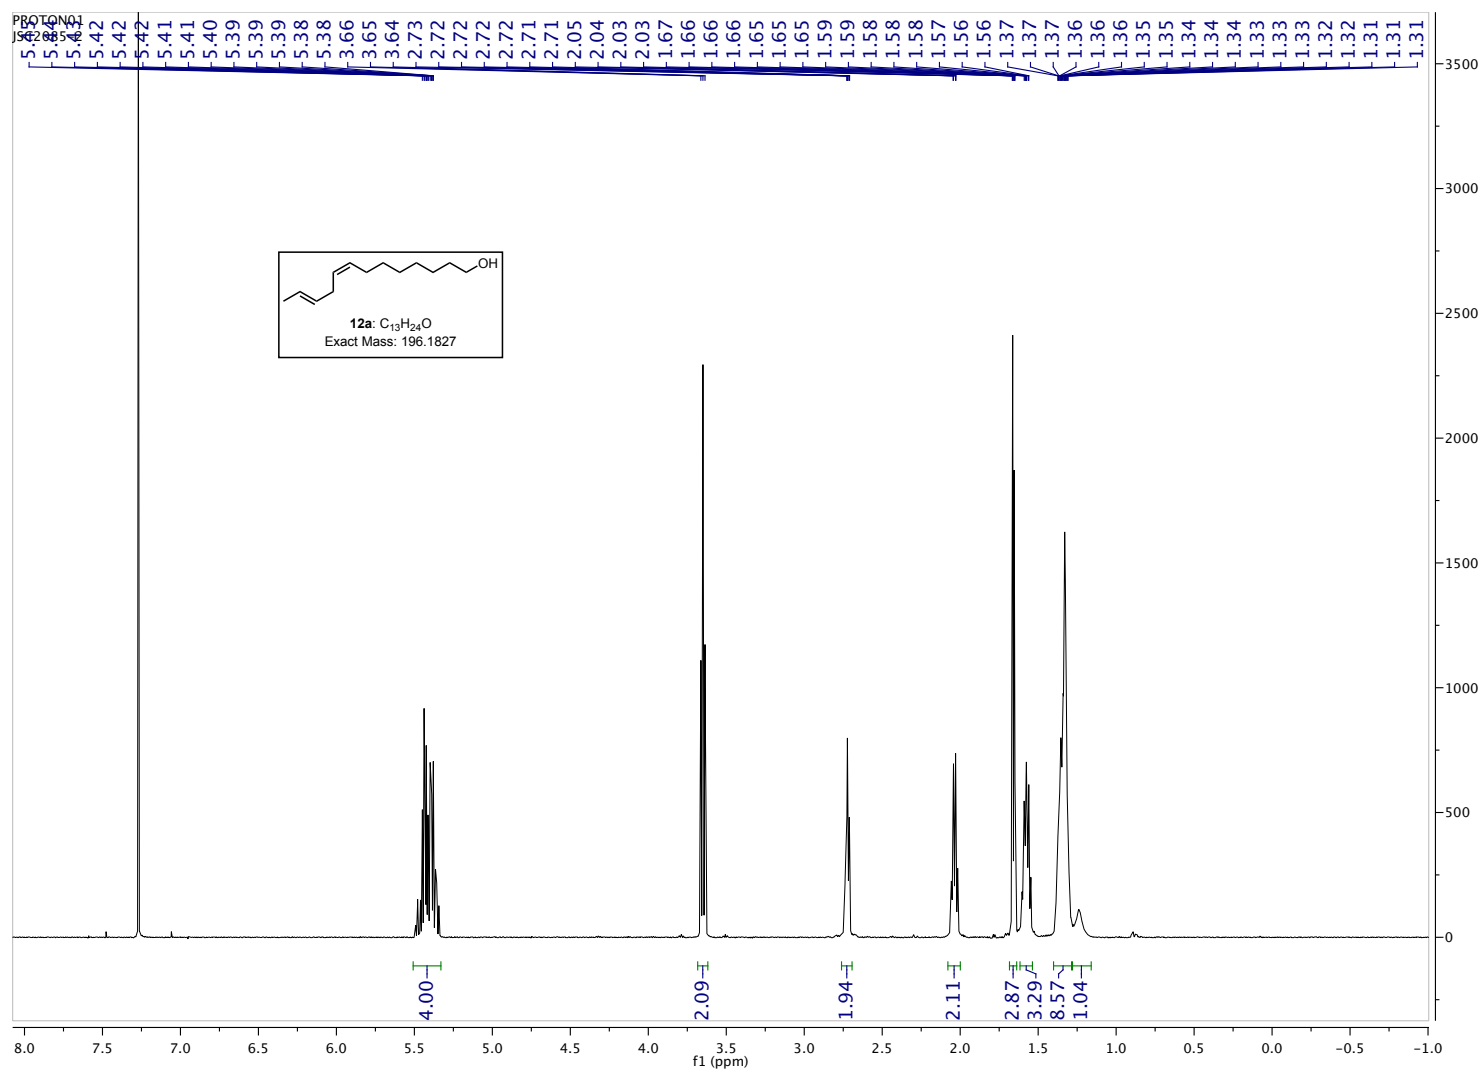

$^{13}\text{C}$  NMR (126 MHz,  $\text{CDCl}_3$ ) spectrum of compound **12a**.

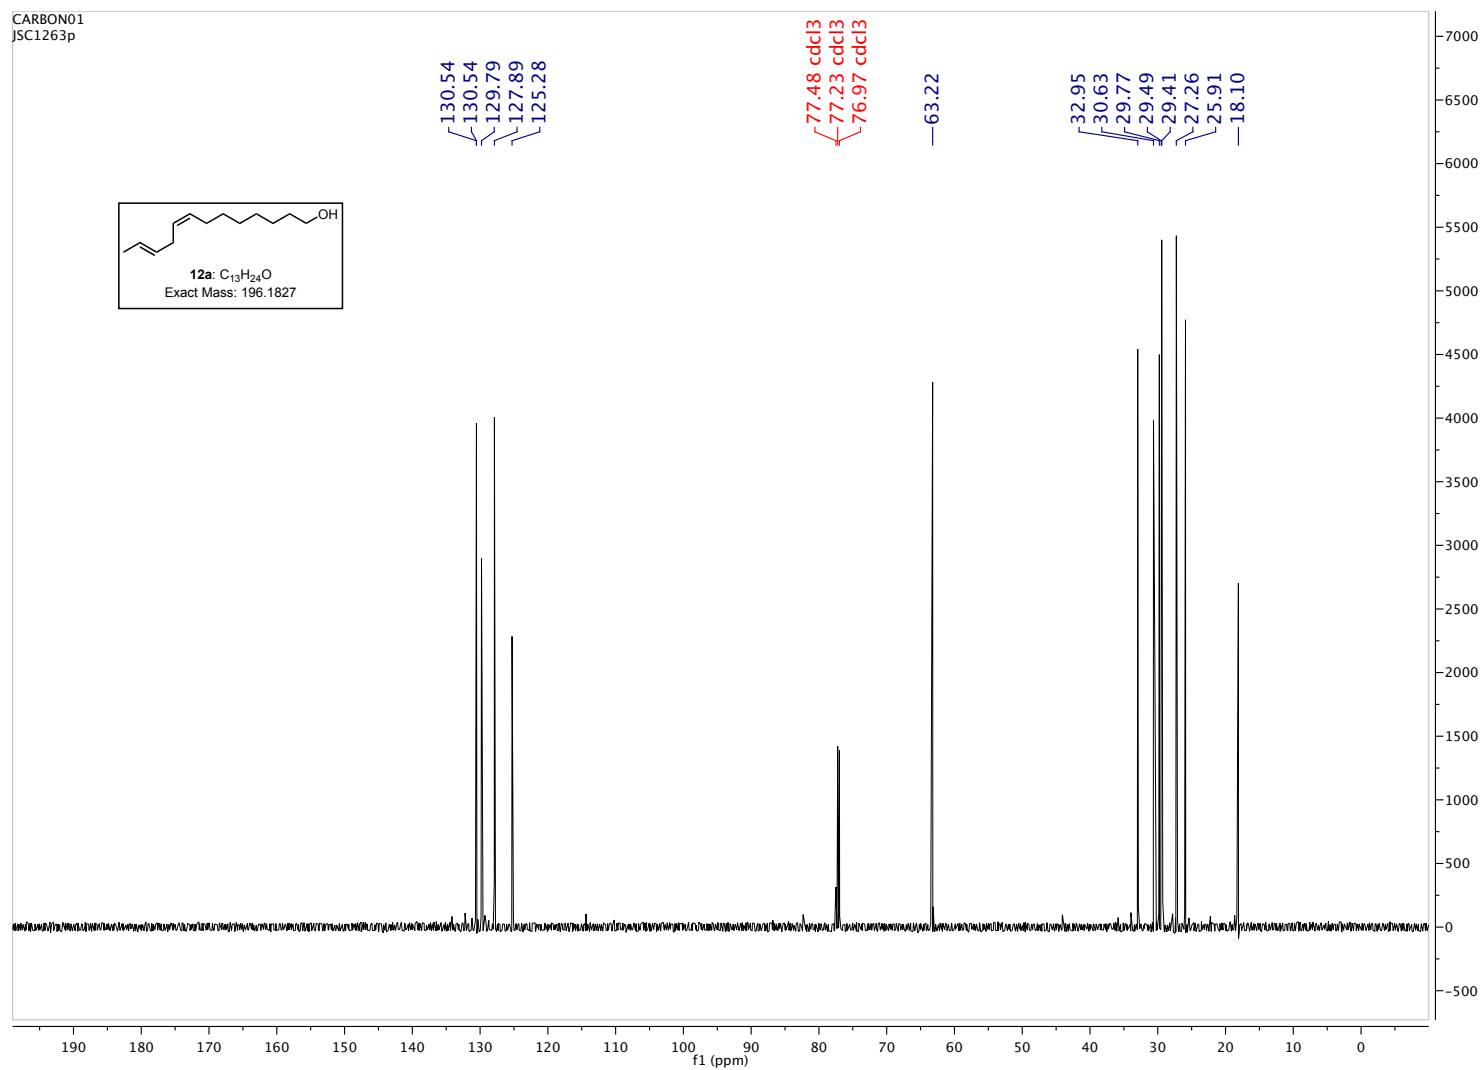

$^1\text{H}$  NMR (500 MHz,  $\text{CDCl}_3$ ) spectrum of compound **12c**.

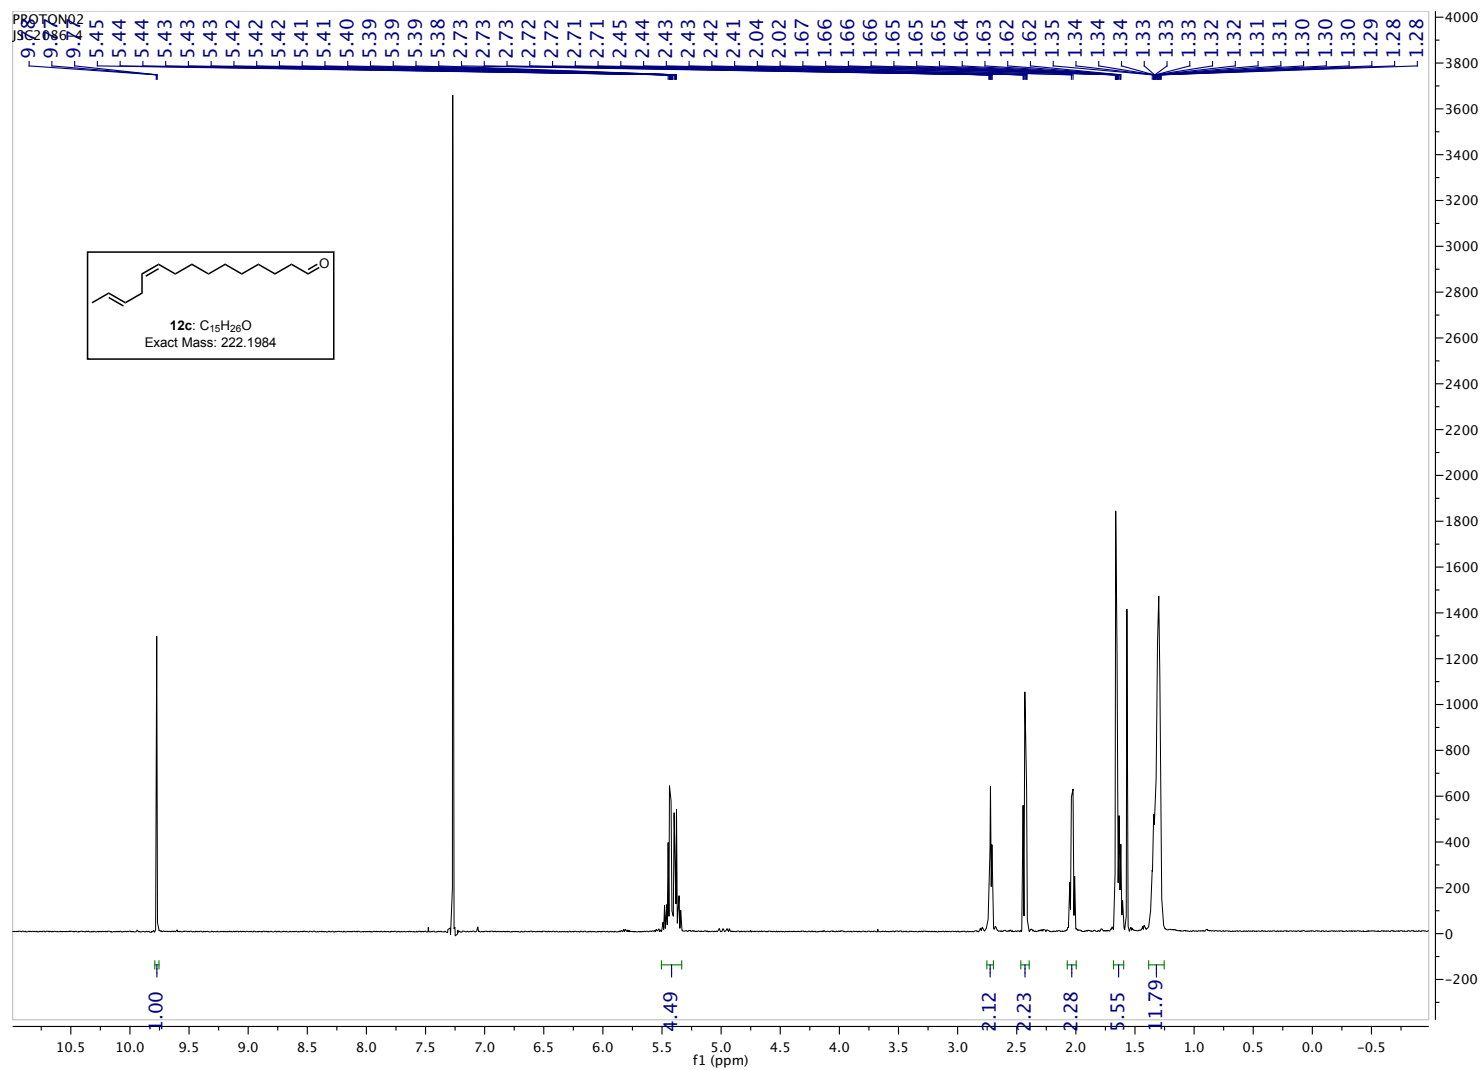

Supporting Information

Cannon, Grubbs

S15

$^{13}\text{C}$  NMR (126 MHz,  $\text{CDCl}_3$ ) spectrum of compound **12c**.

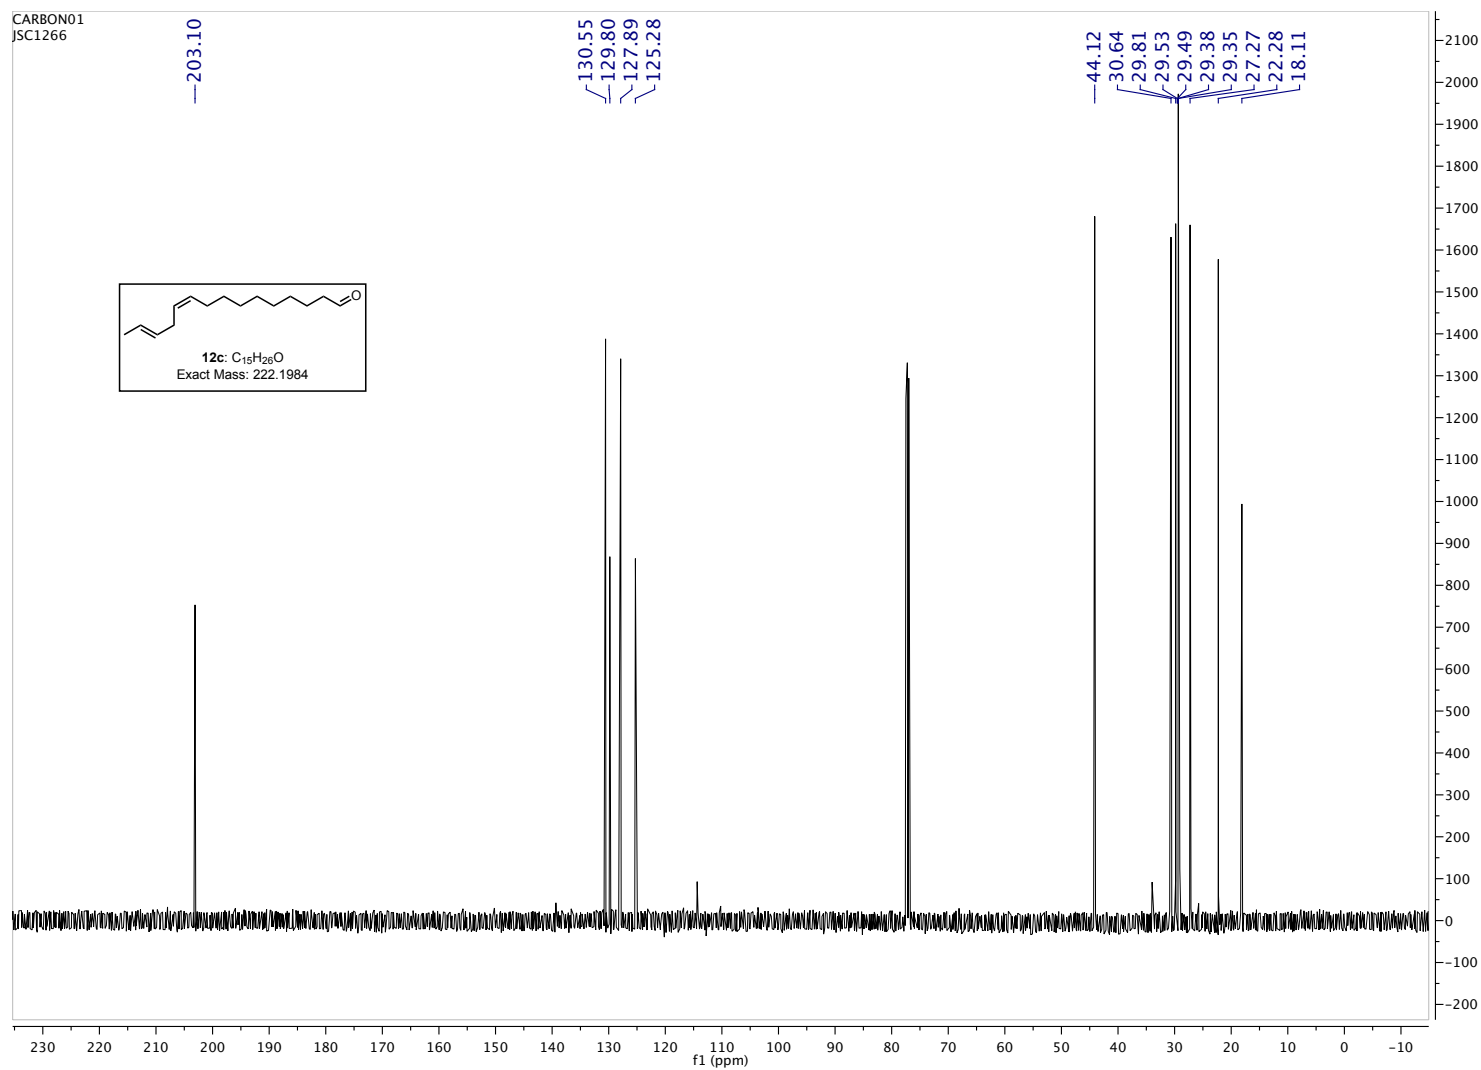



$^1\text{H}$  NMR (500 MHz,  $\text{CDCl}_3$ ) spectrum of compound **12d**.

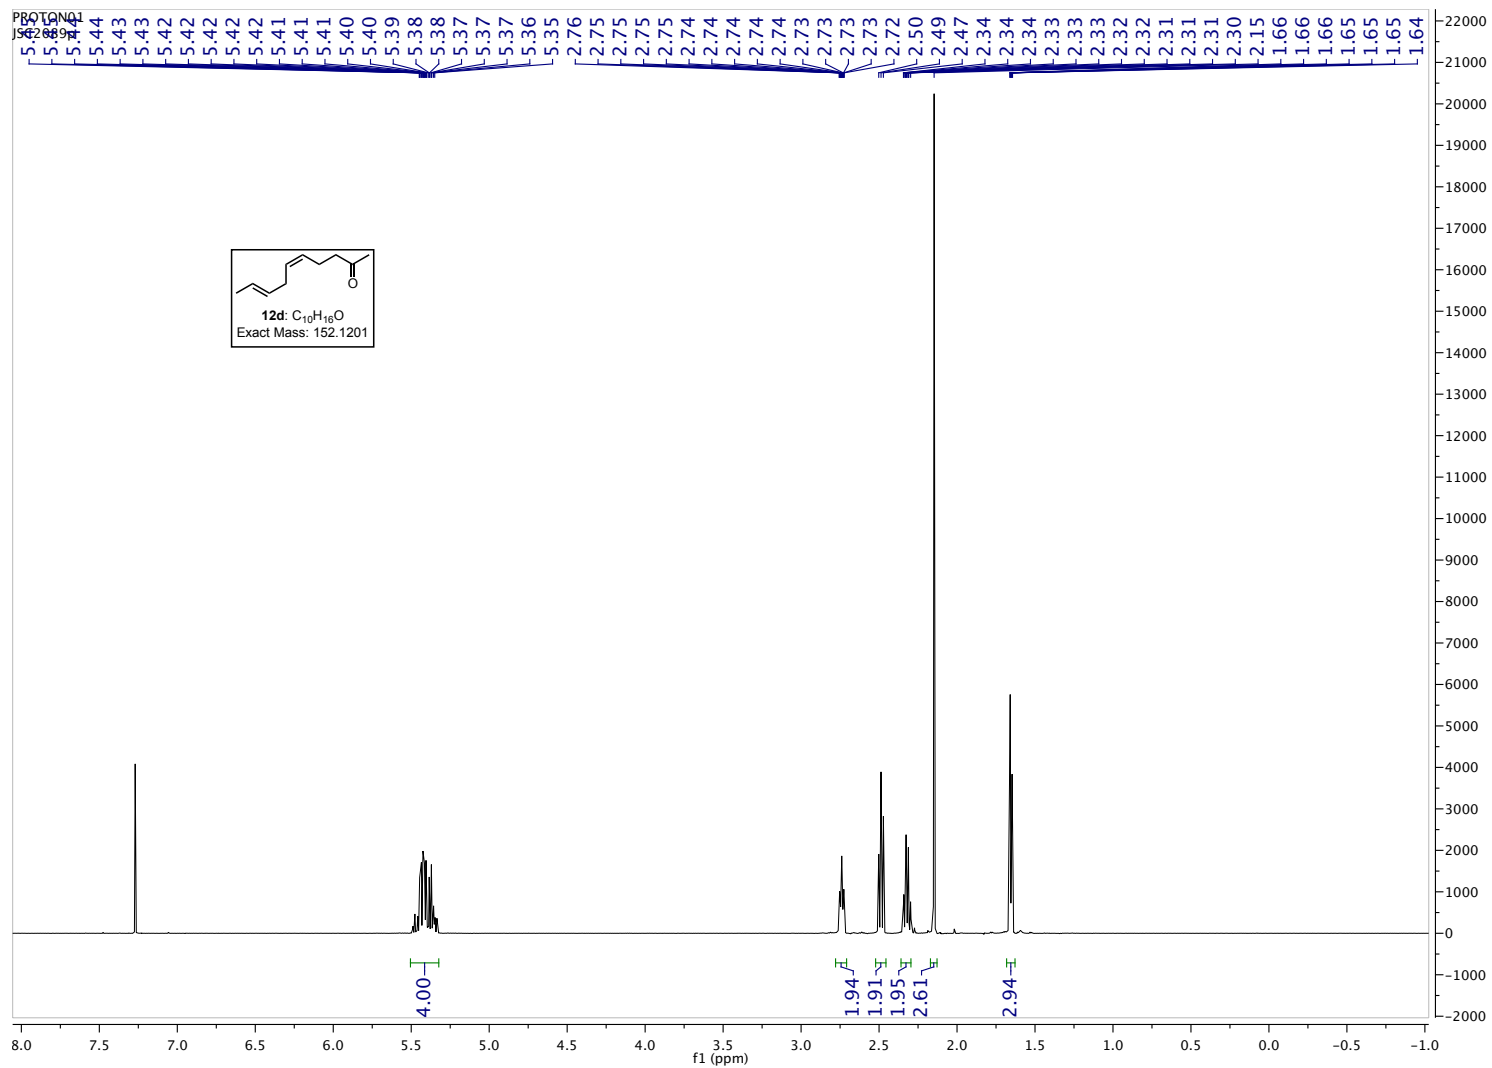

$^{13}\text{C}$  NMR (126 MHz,  $\text{CDCl}_3$ ) spectrum of compound **12d**.

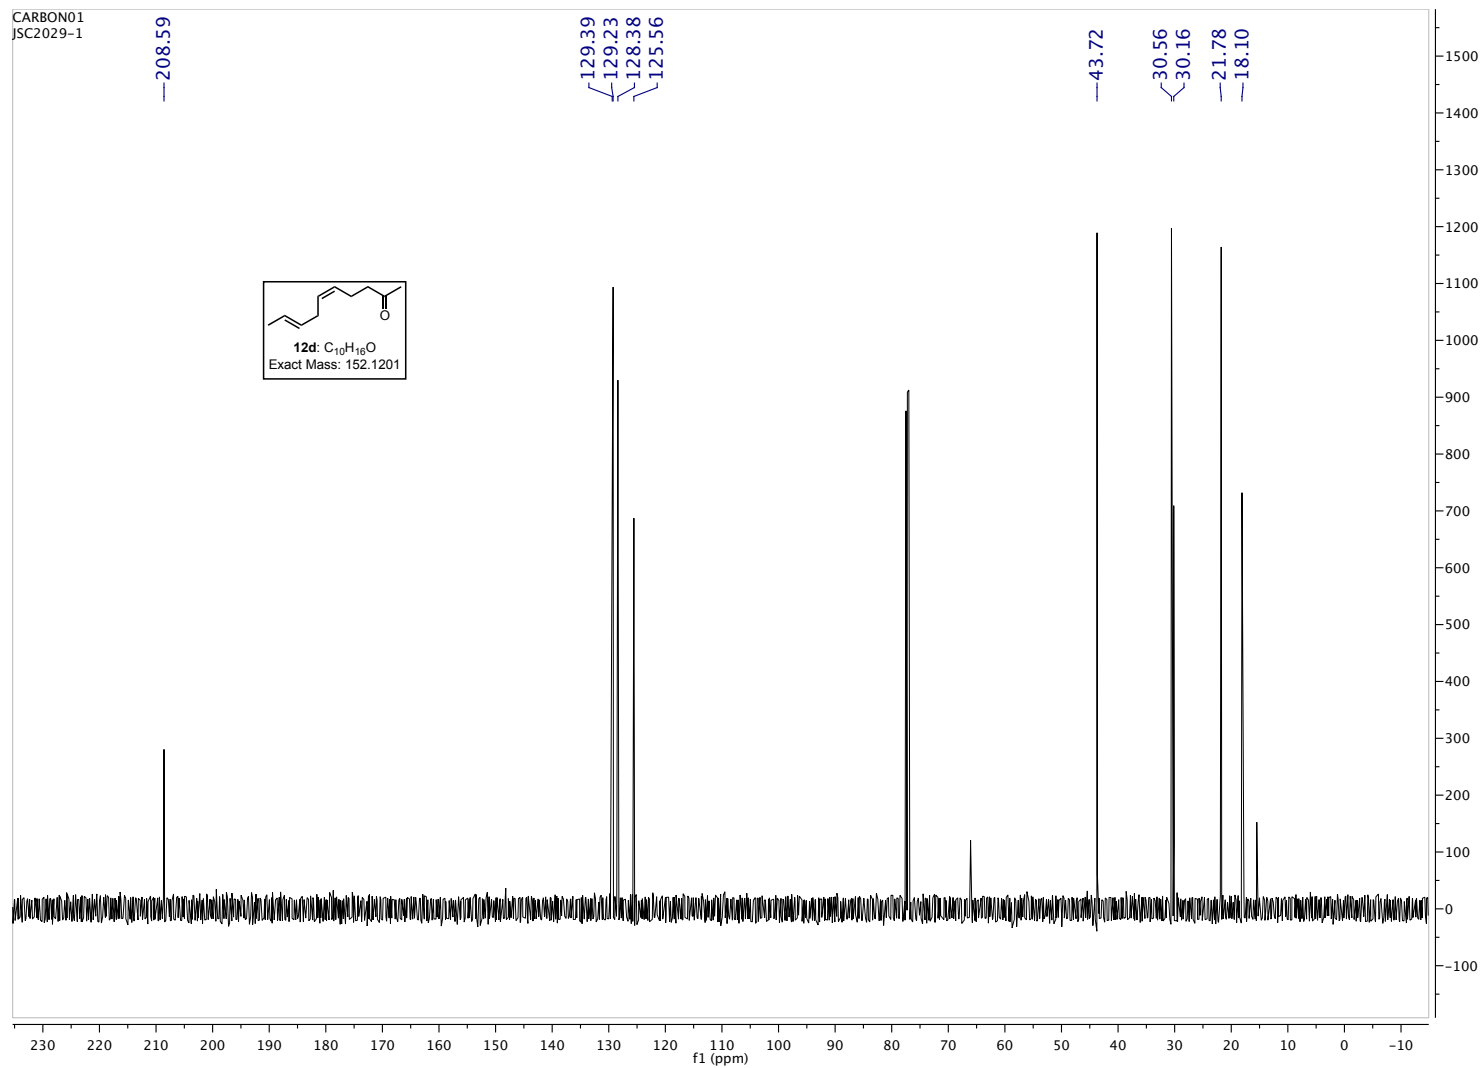

$^1\text{H}$  NMR (500 MHz,  $\text{CDCl}_3$ ) spectrum of compound **12e**.

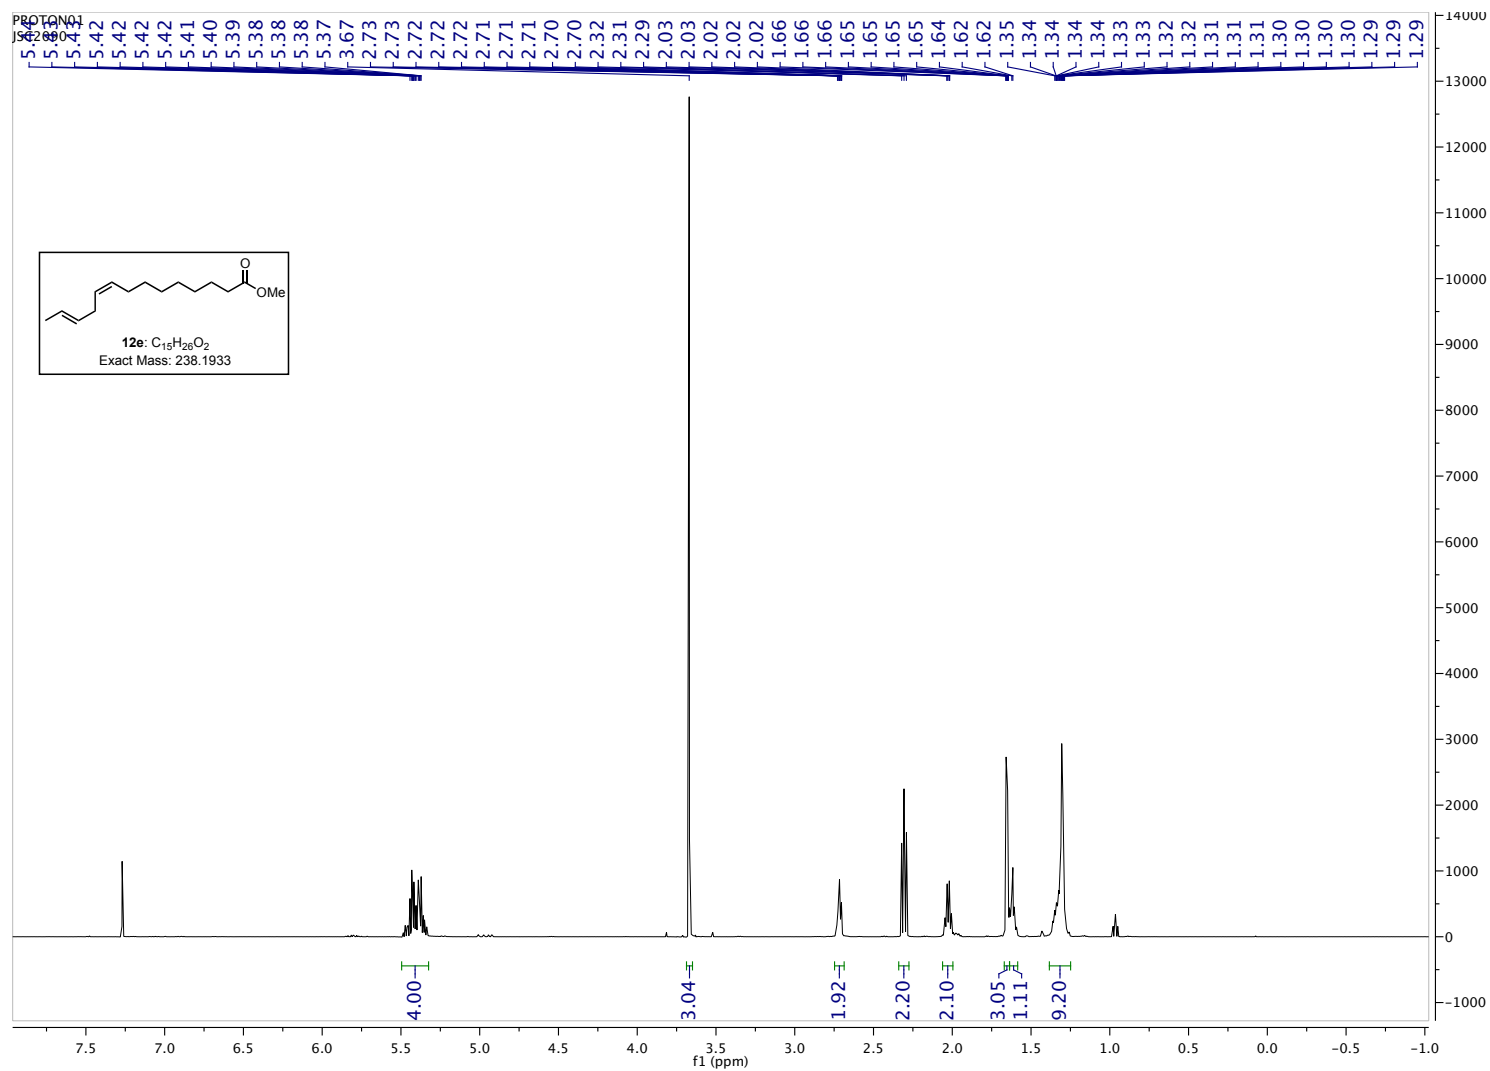

$^{13}\text{C}$  NMR (126 MHz,  $\text{CDCl}_3$ ) spectrum of compound **12e**.

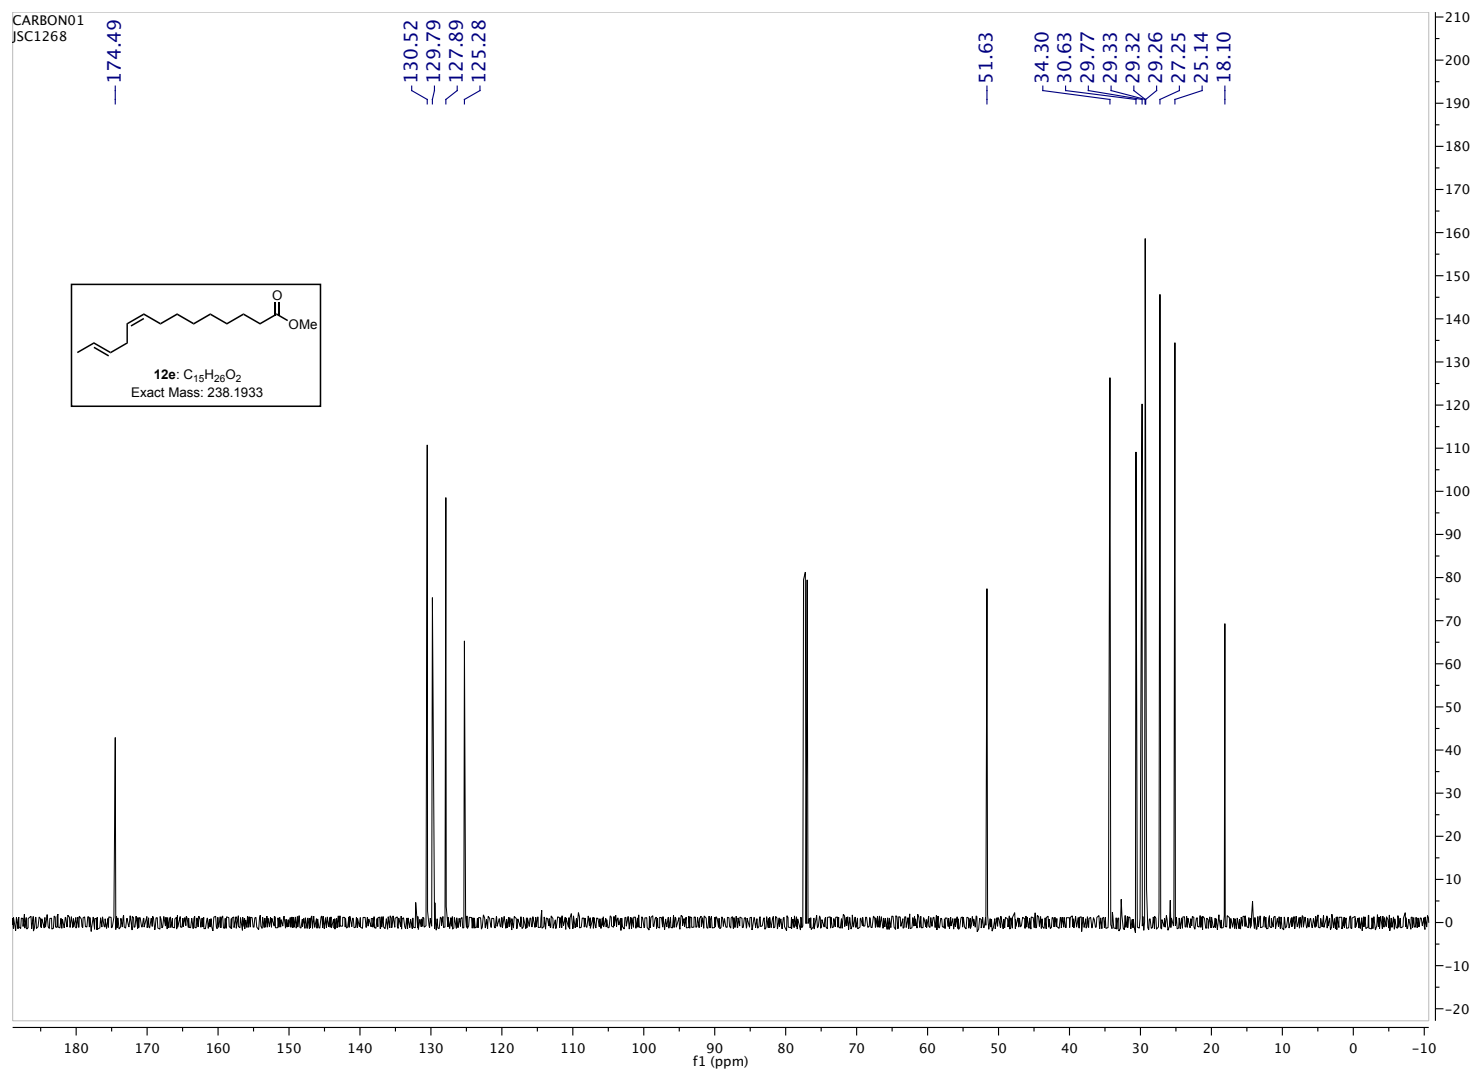

Supporting Information

Cannon, Grubbs

S20

$^1\text{H}$  NMR (500 MHz,  $\text{CDCl}_3$ ) spectrum of compound **12f**.

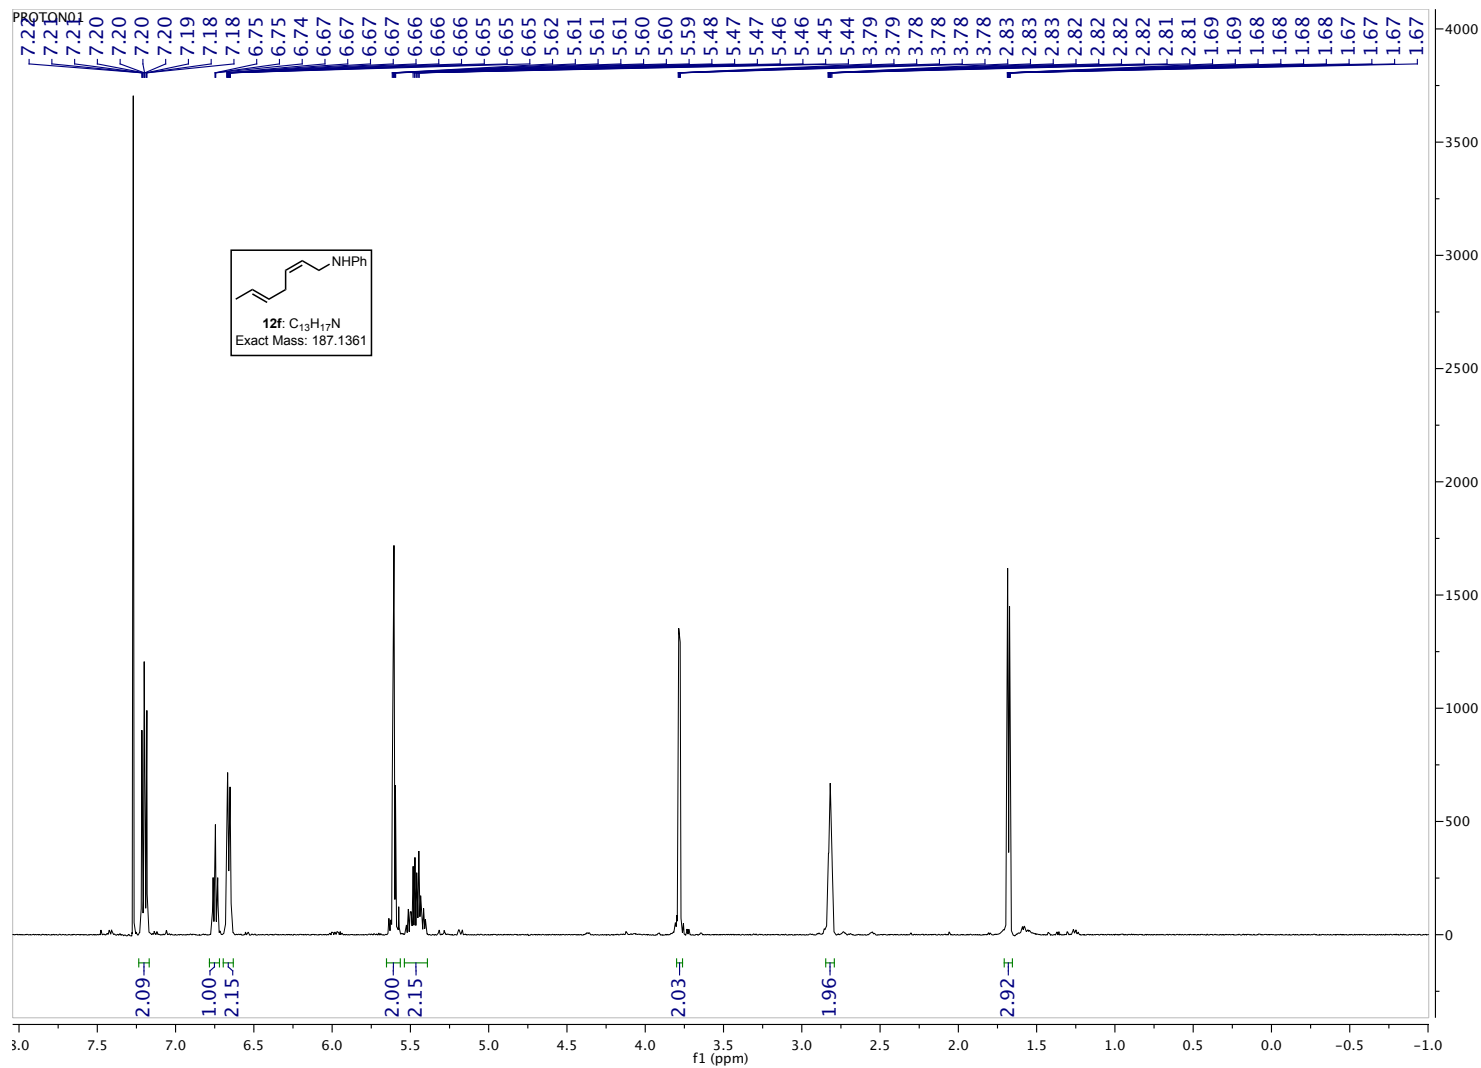

$^{13}\text{C}$  NMR (126 MHz,  $\text{CDCl}_3$ ) spectrum of compound **12f**.

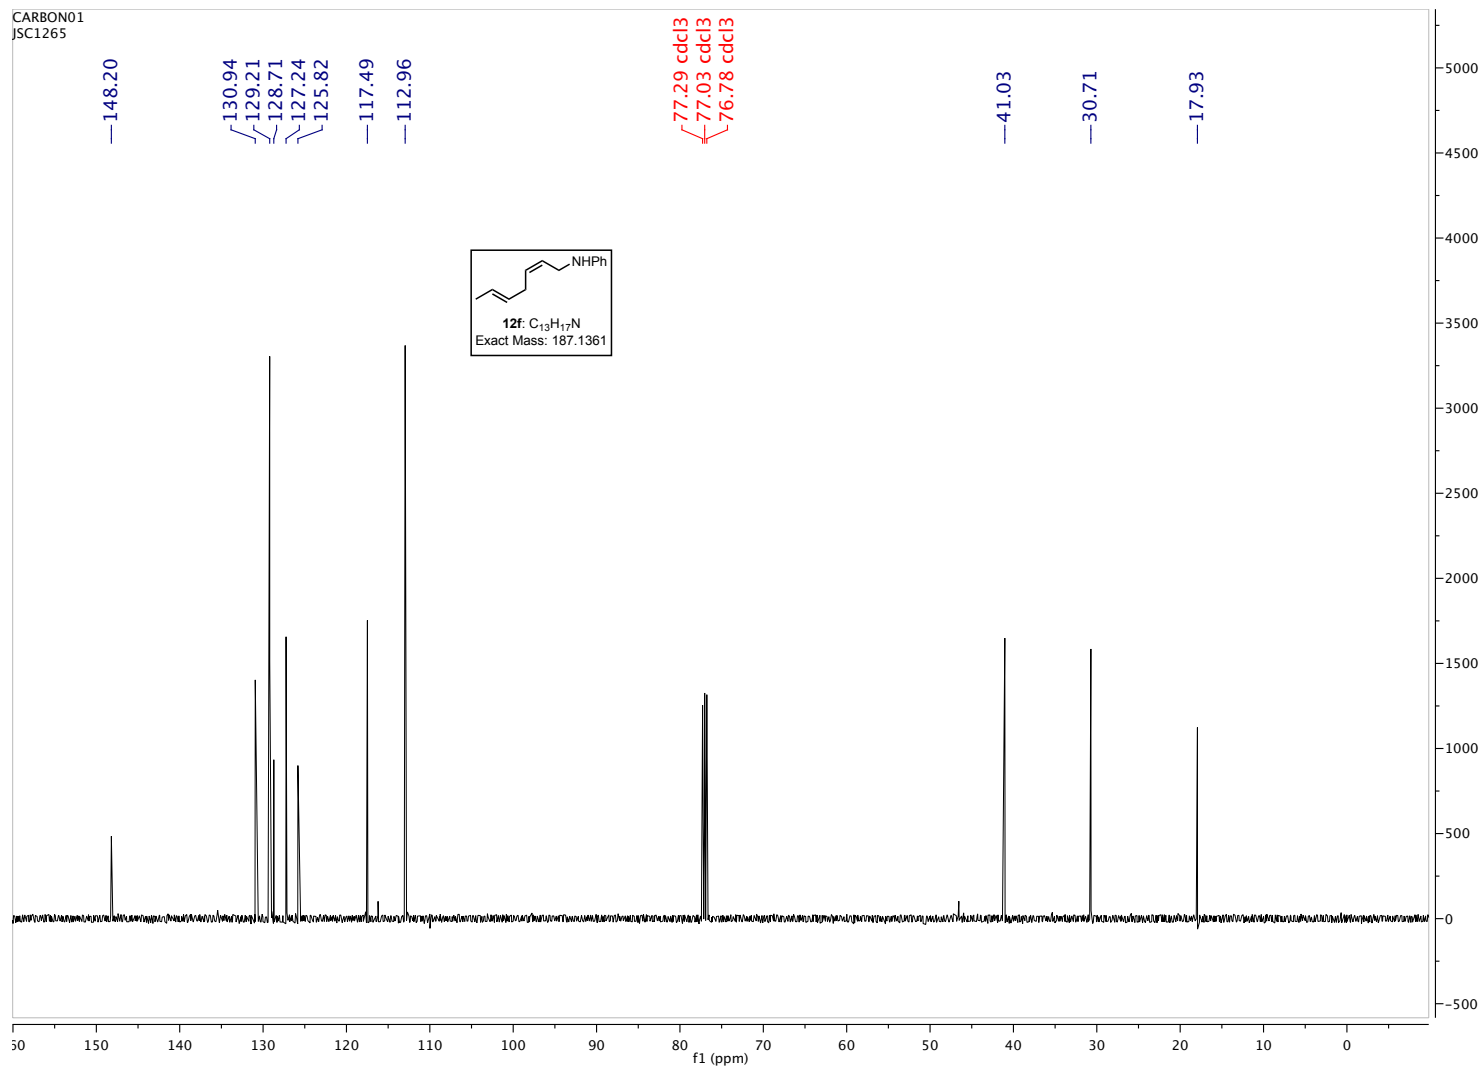

$^1\text{H}$  NMR (500 MHz,  $\text{CDCl}_3$ ) spectrum of compound **12g**.

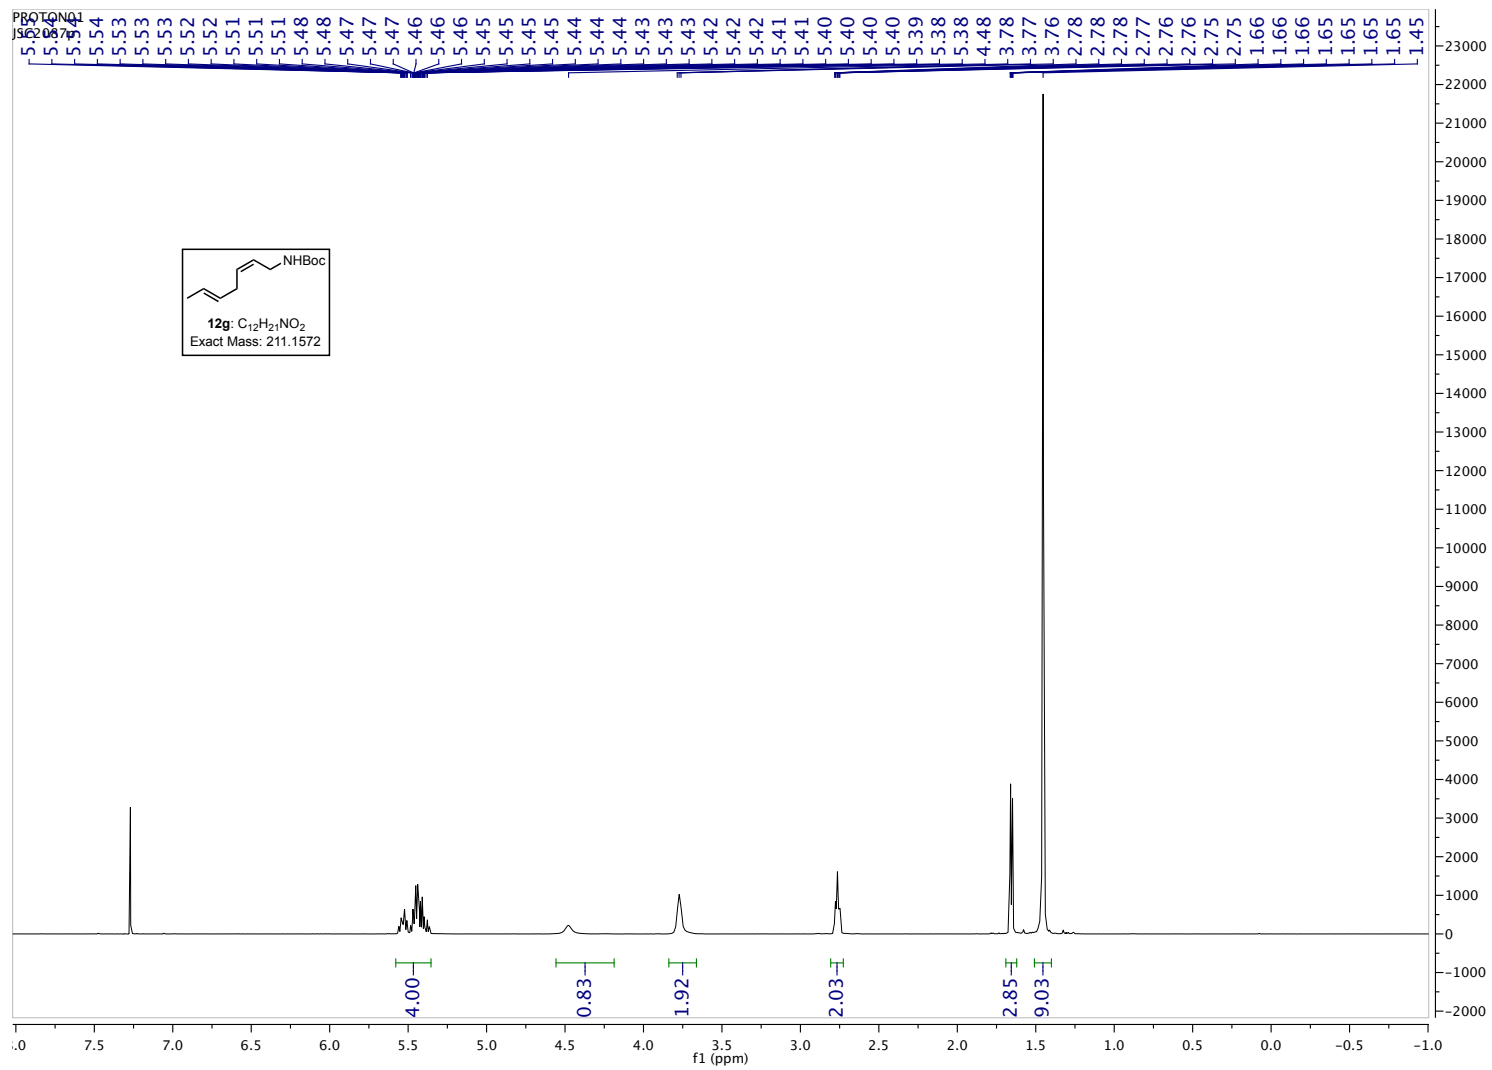

$^{13}\text{C}$  NMR (126 MHz,  $\text{CDCl}_3$ ) spectrum of compound **12g**.

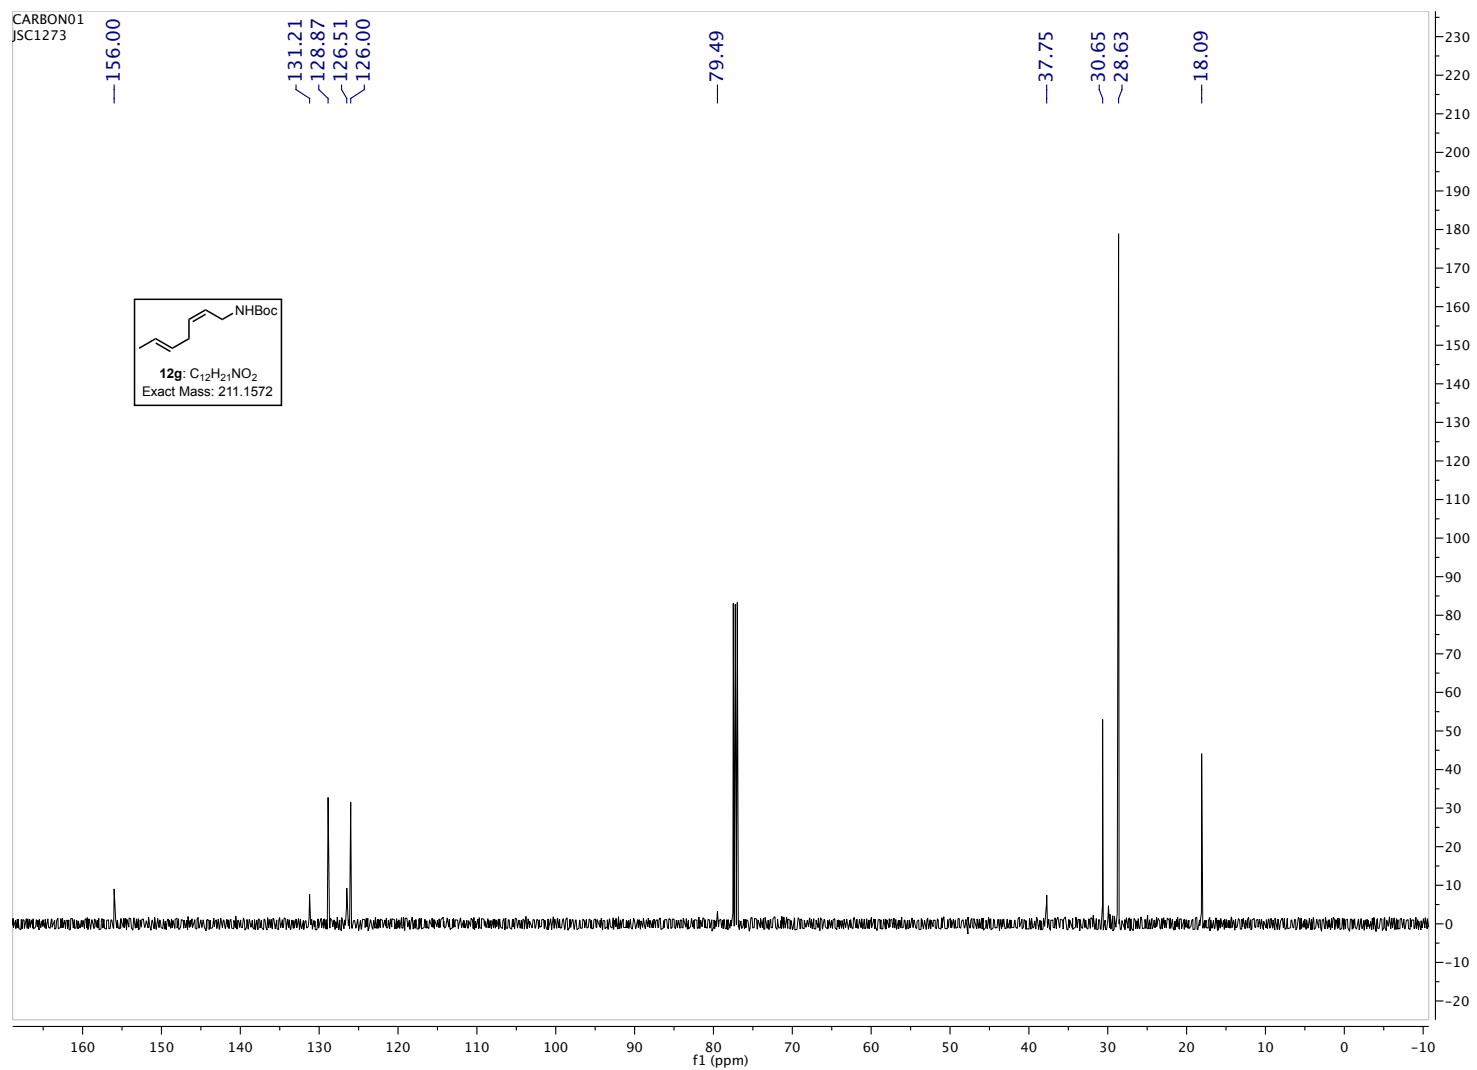



$^1\text{H}$  NMR (500 MHz,  $\text{CDCl}_3$ ) spectrum of compound **12h**.

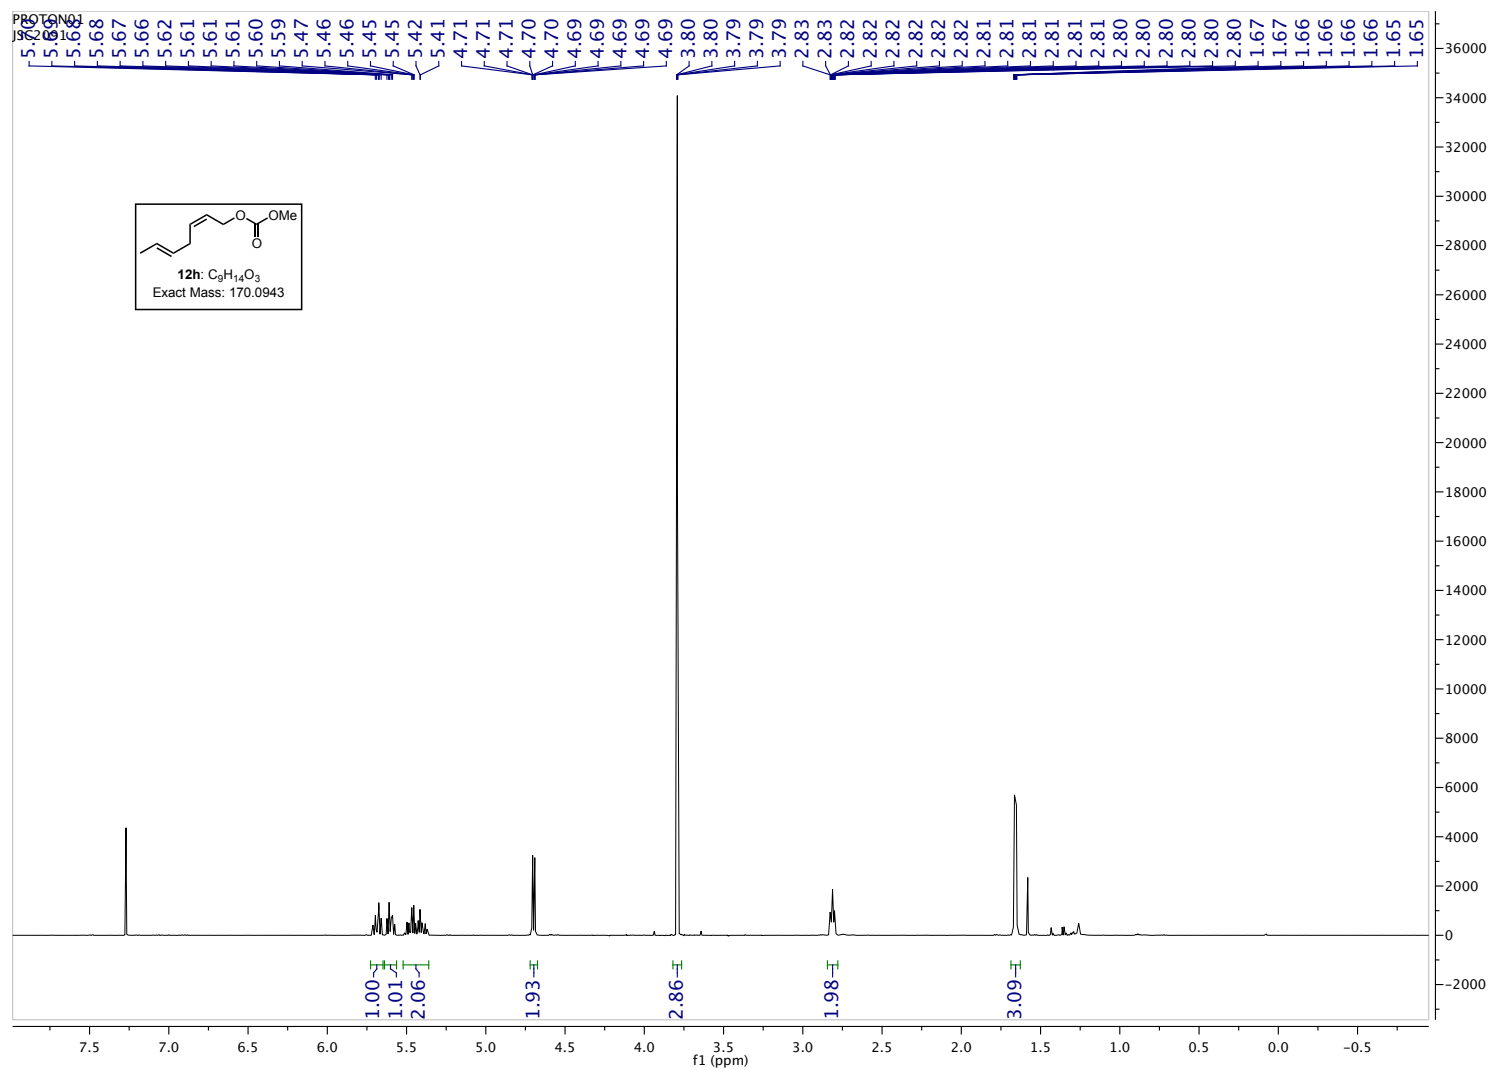

Supporting Information

Cannon, Grubbs

S25

$^{13}\text{C}$  NMR (126 MHz,  $\text{CDCl}_3$ ) spectrum of compound **12h**.

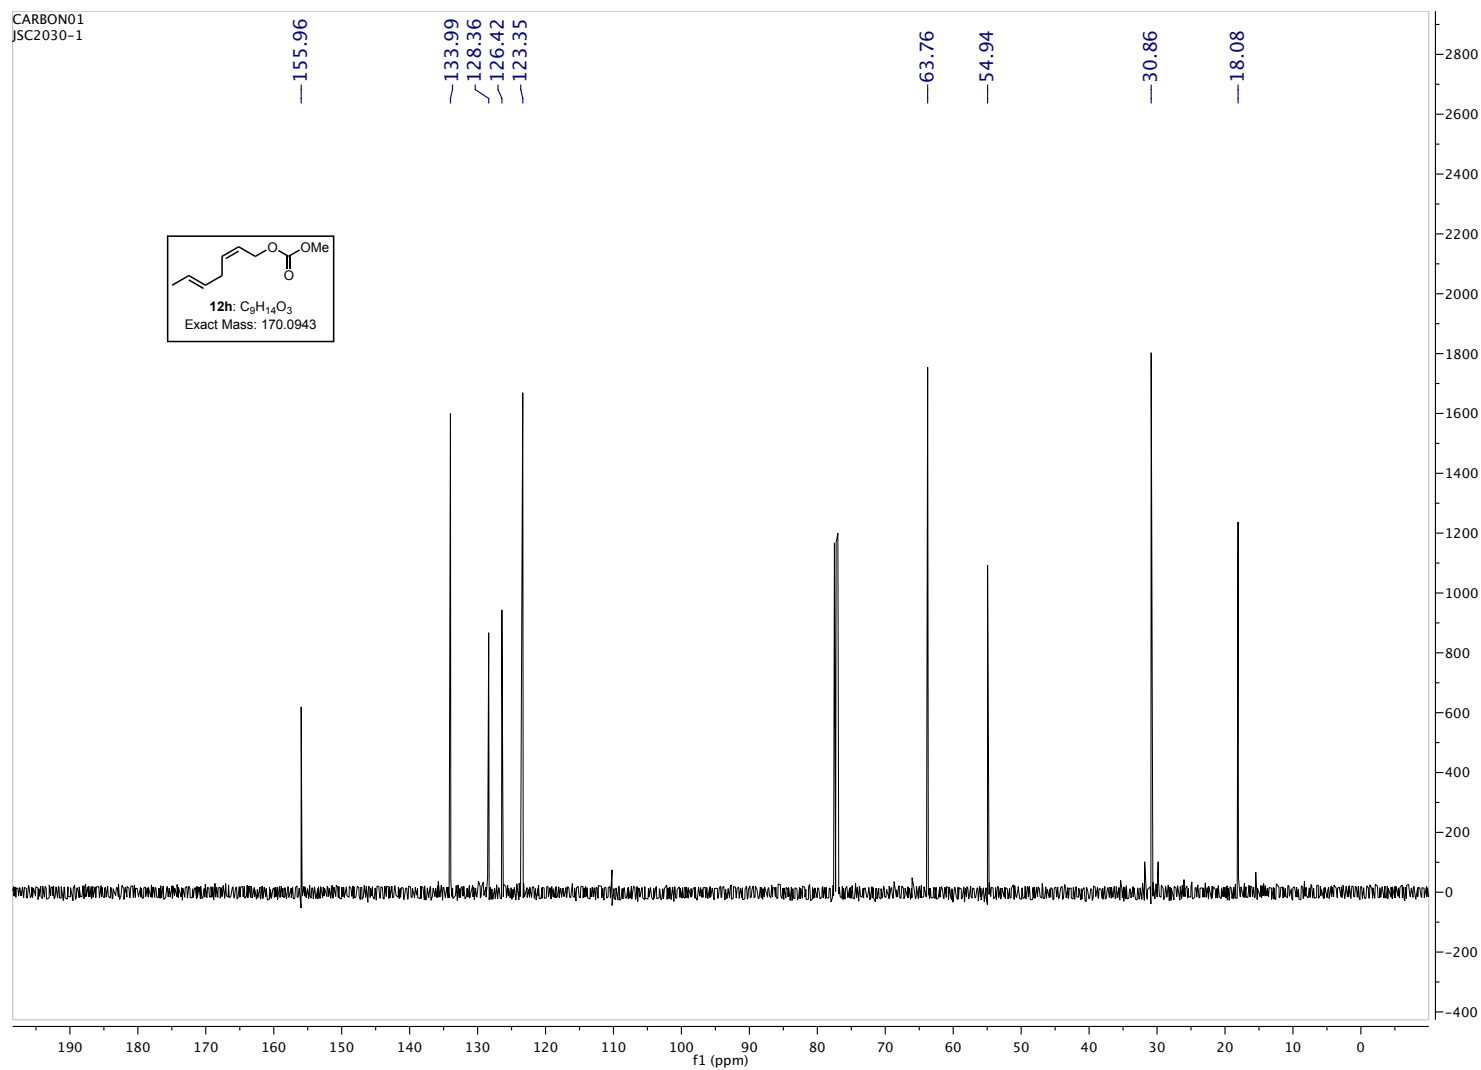

Supporting Information

Cannon, Grubbs

S26

$^1\text{H}$  NMR (500 MHz,  $\text{CDCl}_3$ ) spectrum of compound **12i**.

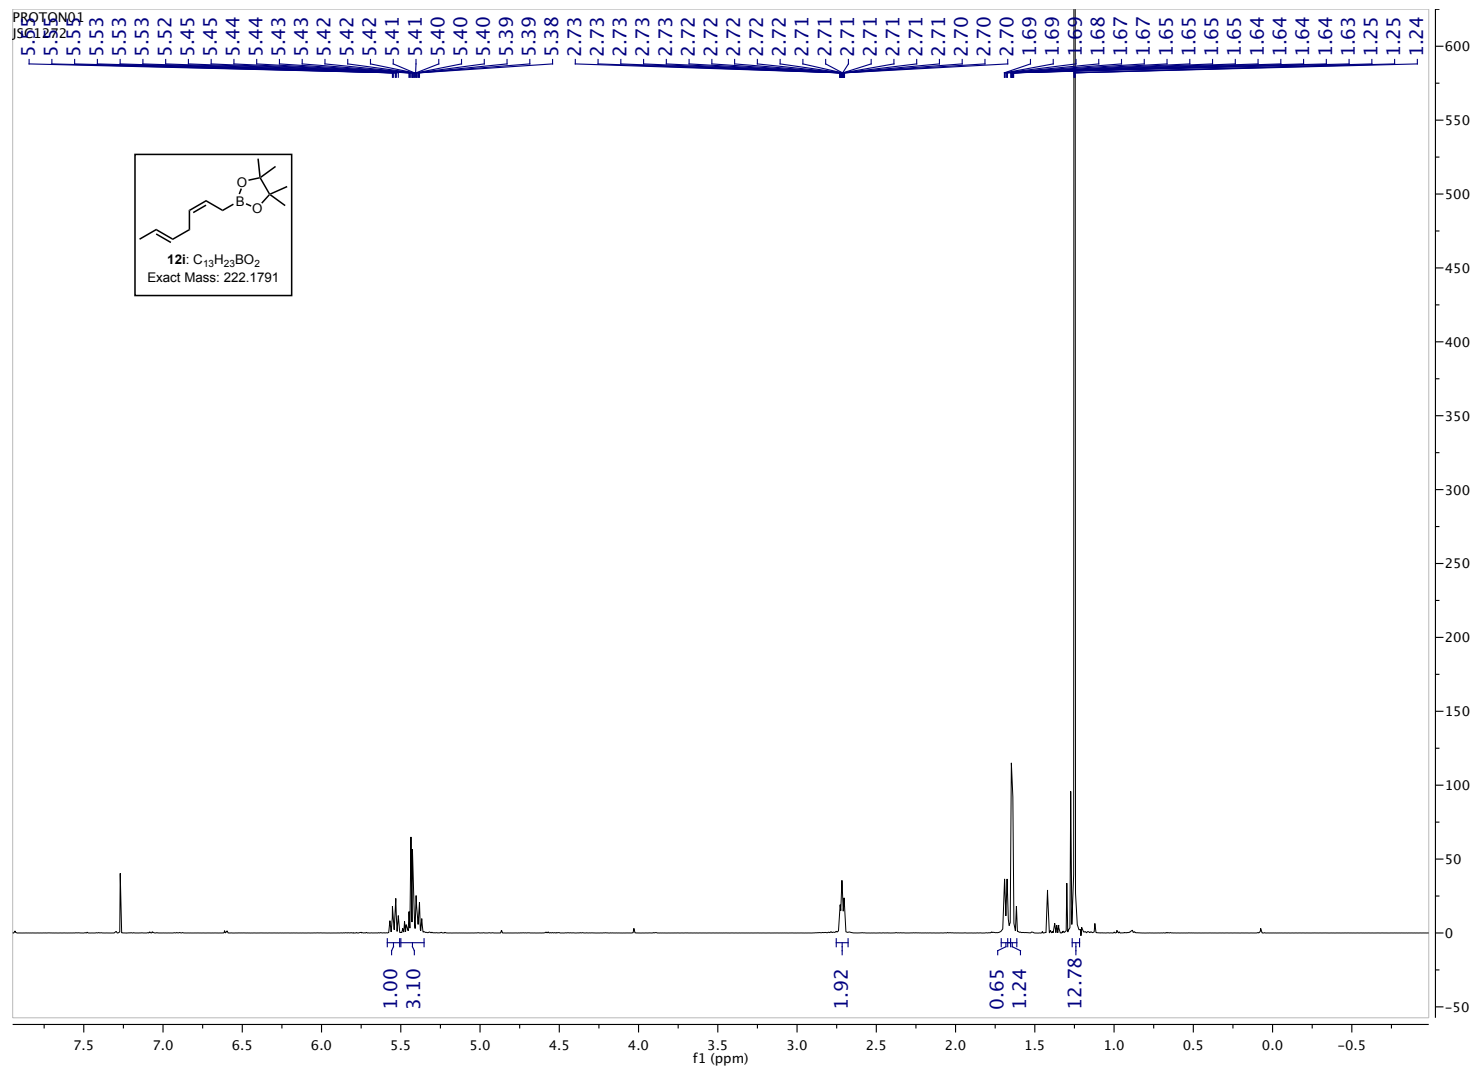

Supporting Information

Cannon, Grubbs

S27

$^{13}\text{C}$  NMR (126 MHz,  $\text{CDCl}_3$ ) spectrum of compound **12i**.

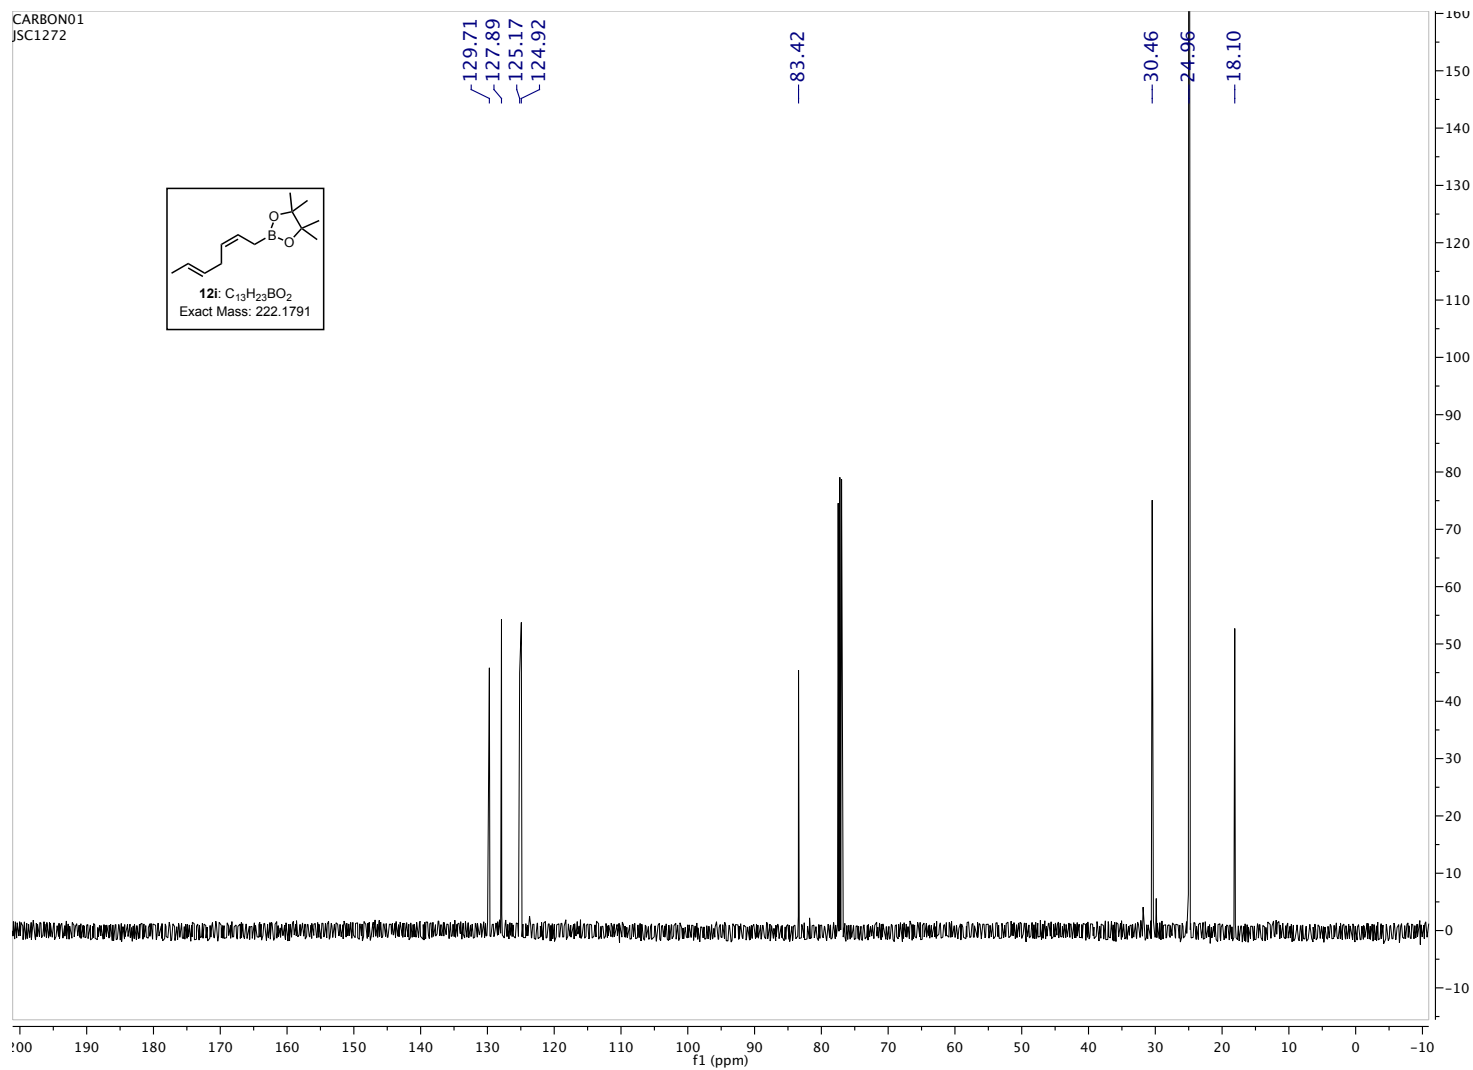

$^1\text{H}$  NMR (500 MHz,  $\text{CDCl}_3$ ) spectrum of compound **12j**.

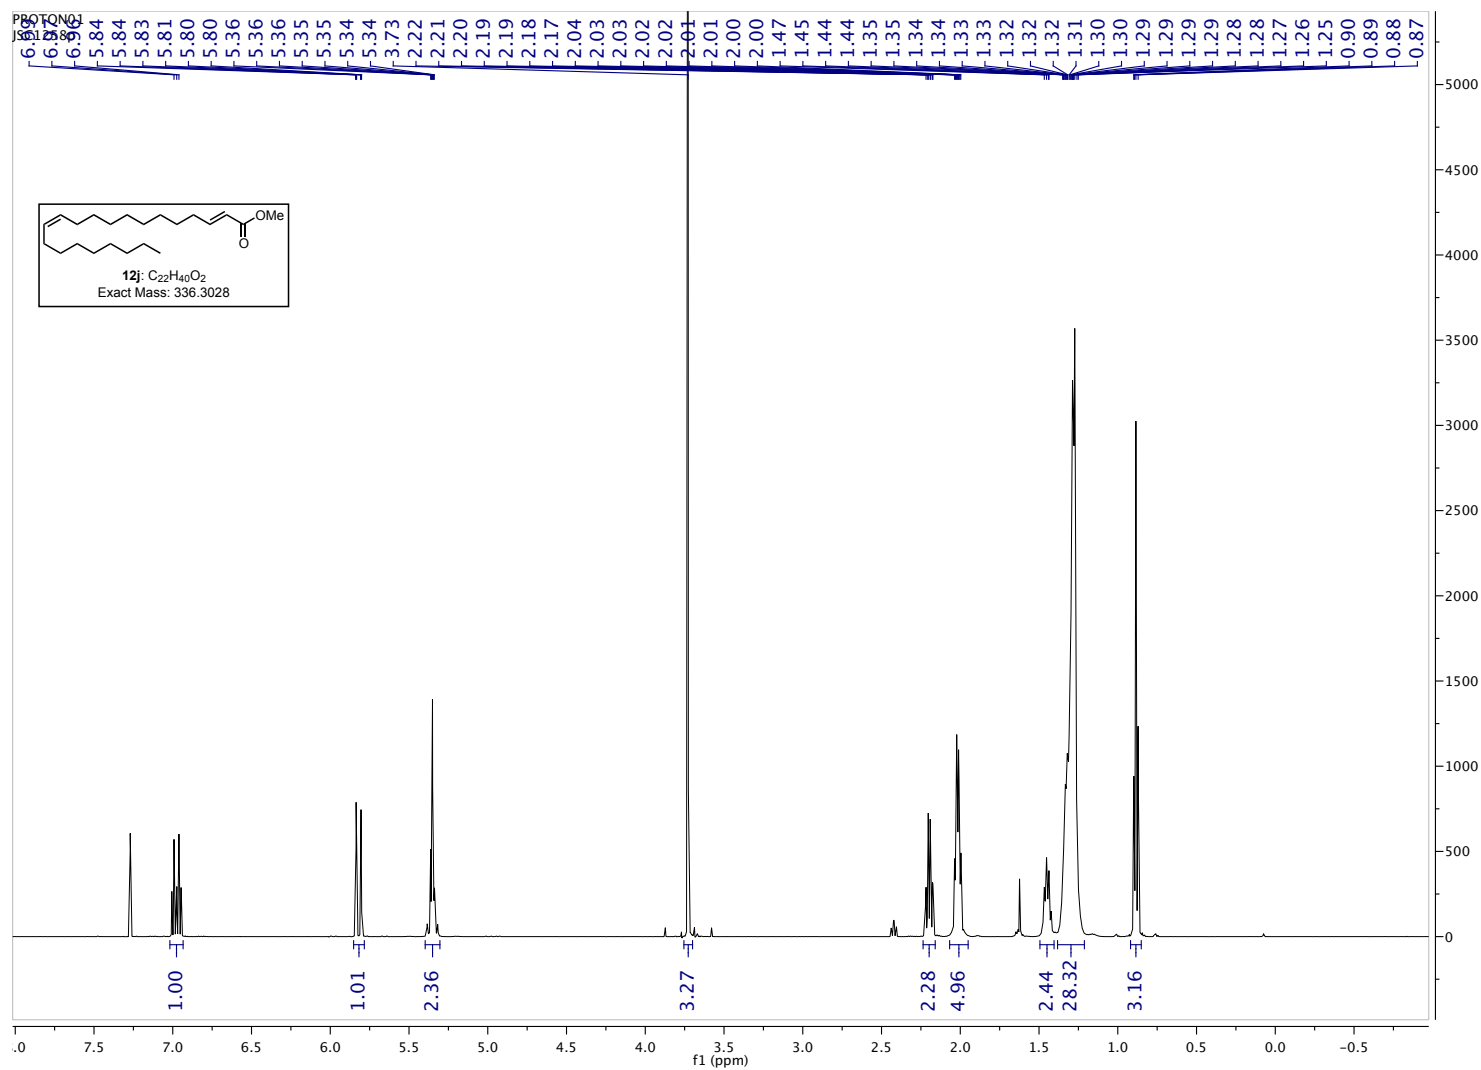

$^{13}\text{C}$  NMR (126 MHz,  $\text{CDCl}_3$ ) spectrum of compound **12j**.

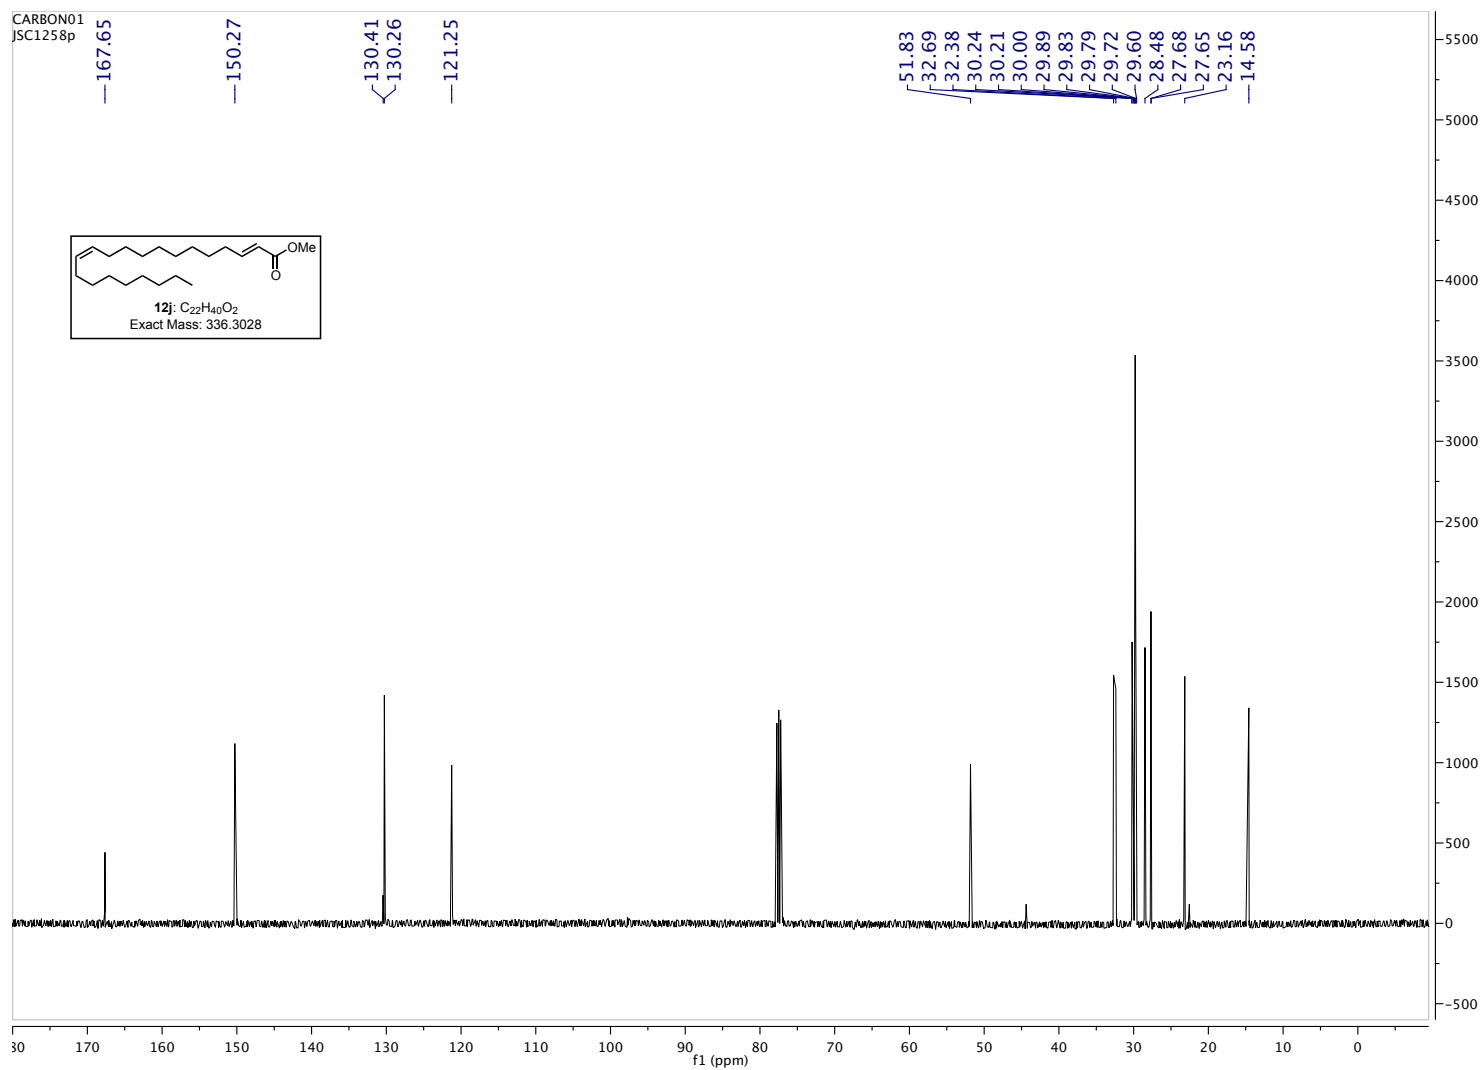

Supporting Information

Cannon, Grubbs

S30

$^1\text{H}$  NMR (500 MHz,  $\text{CDCl}_3$ ) spectrum of compound **12k**.

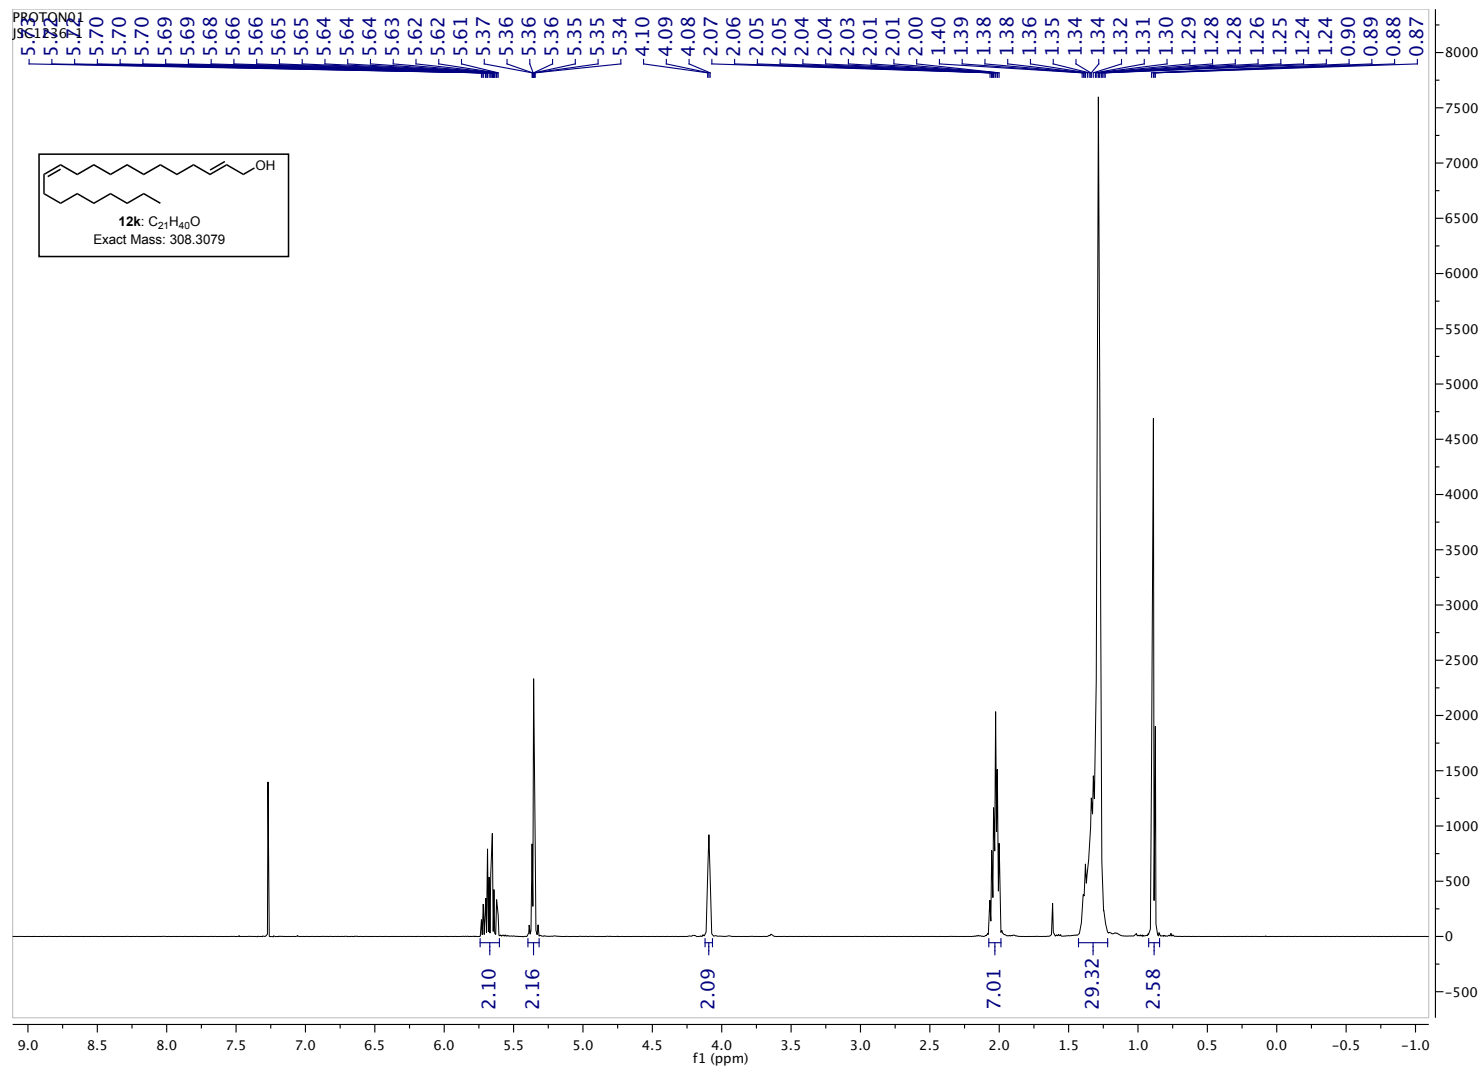

Supporting Information

Cannon, Grubbs

S31

$^{13}\text{C}$  NMR (126 MHz,  $\text{CDCl}_3$ ) spectrum of compound **12k**.

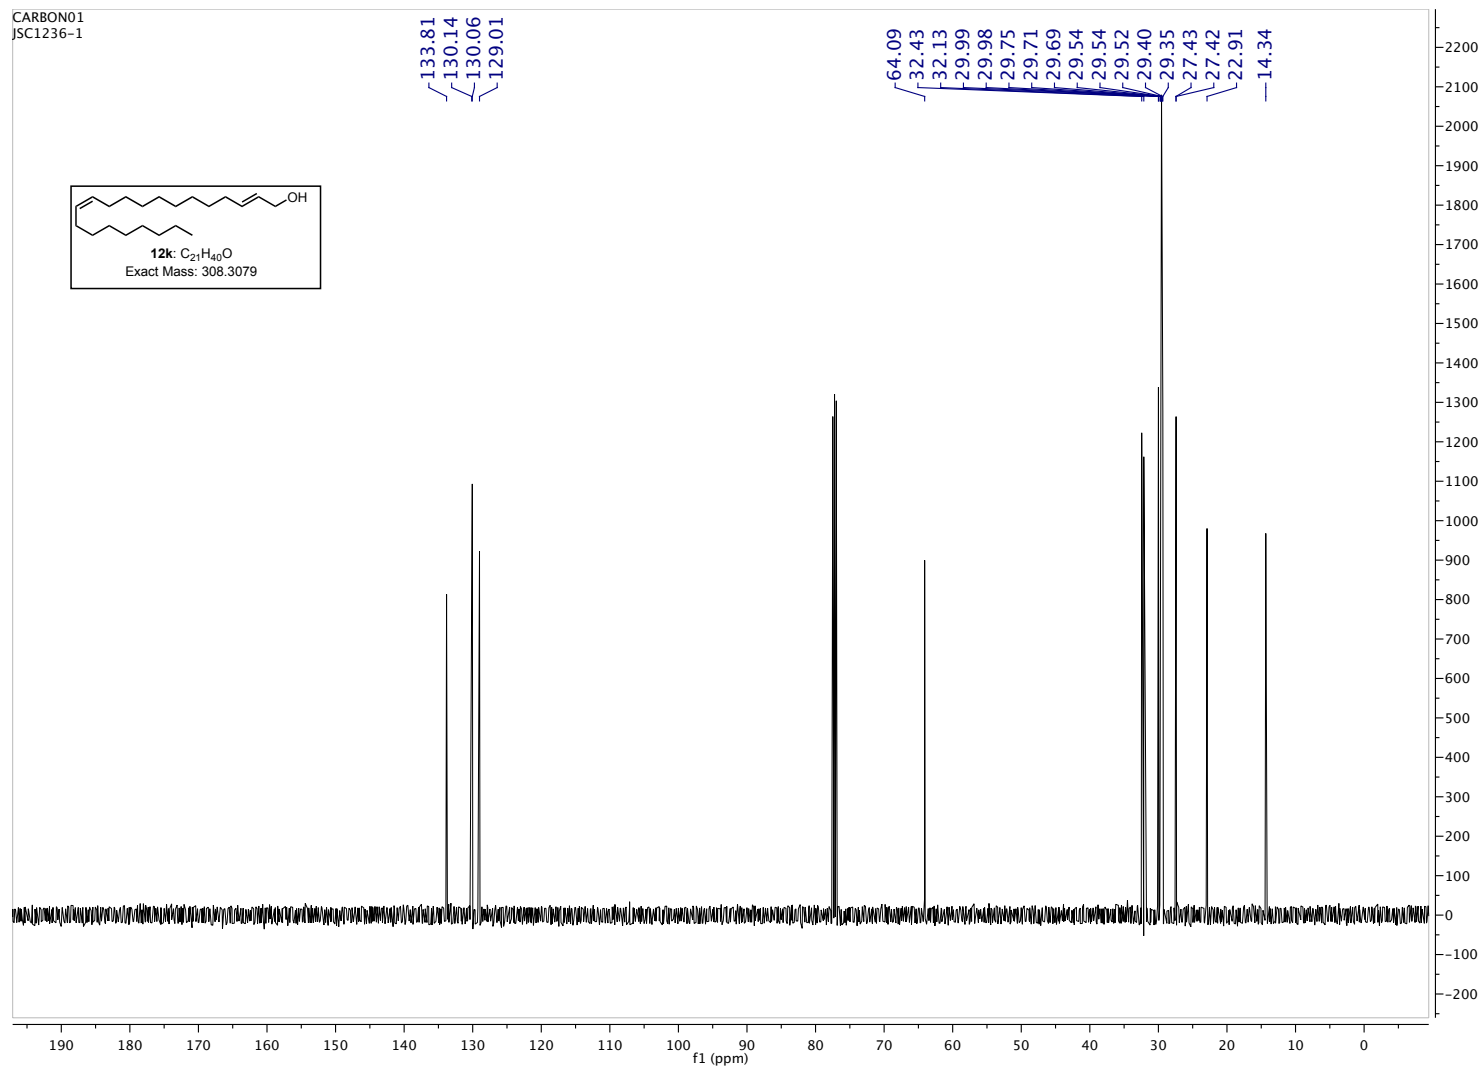

Supporting Information

Cannon, Grubbs

S32



$^1\text{H}$  NMR (500 MHz,  $\text{CDCl}_3$ ) spectrum of compound **12l**.

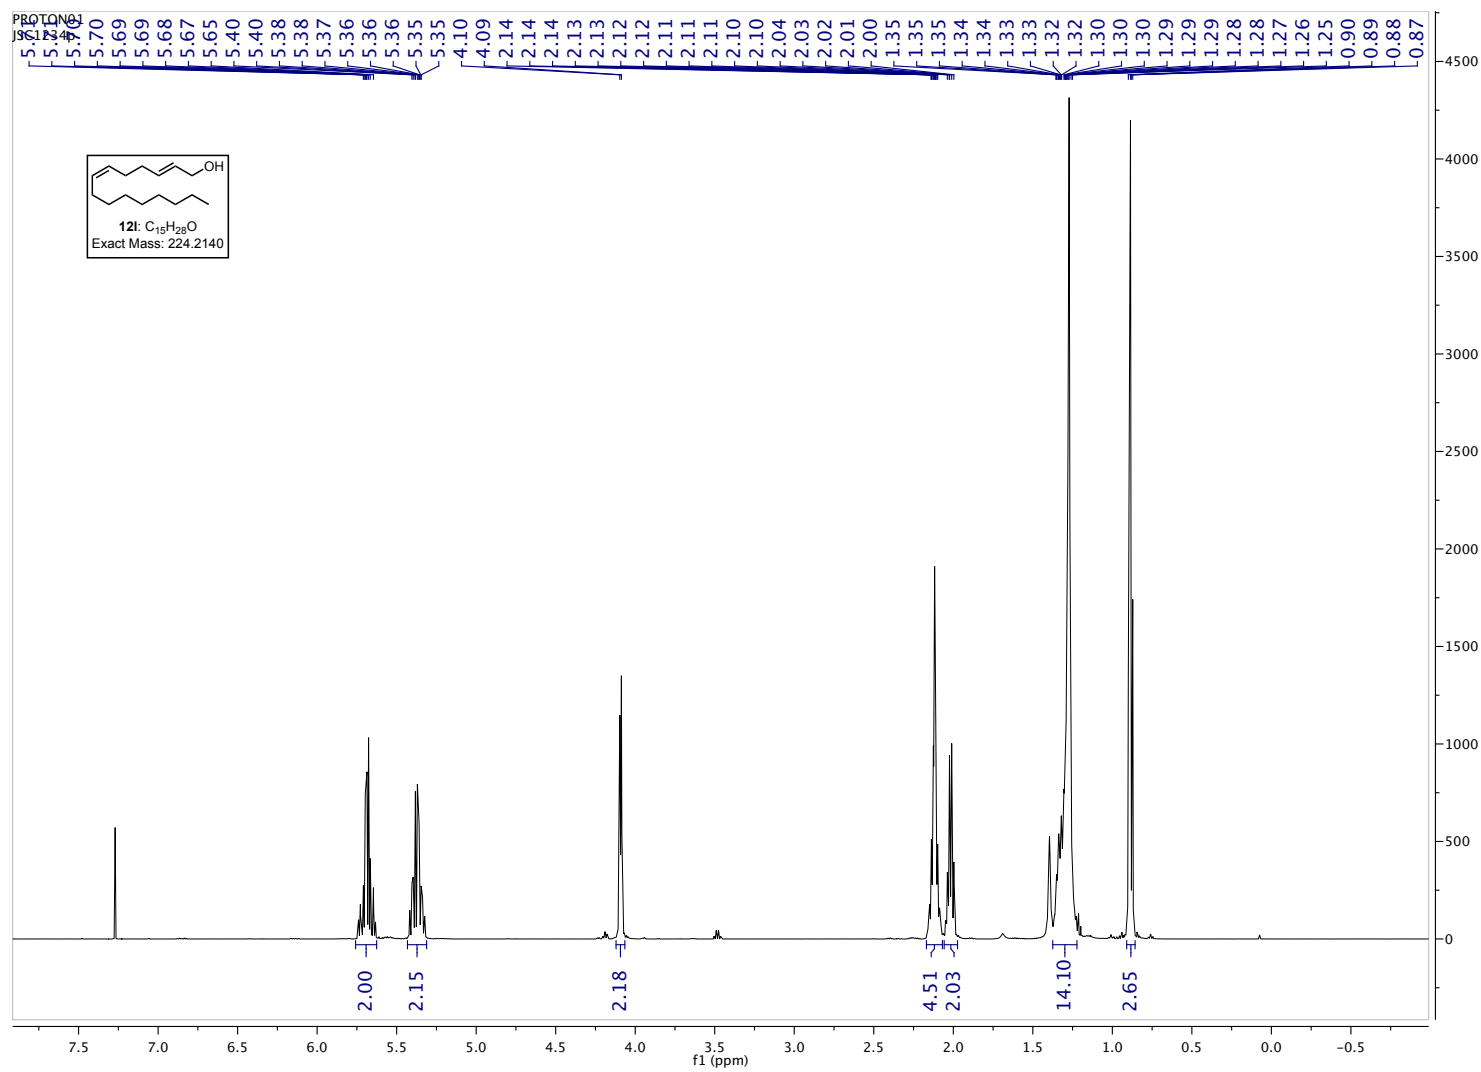

Supporting Information

Cannon, Grubbs

S33

$^{13}\text{C}$  NMR (126 MHz,  $\text{CDCl}_3$ ) spectrum of compound **121**.

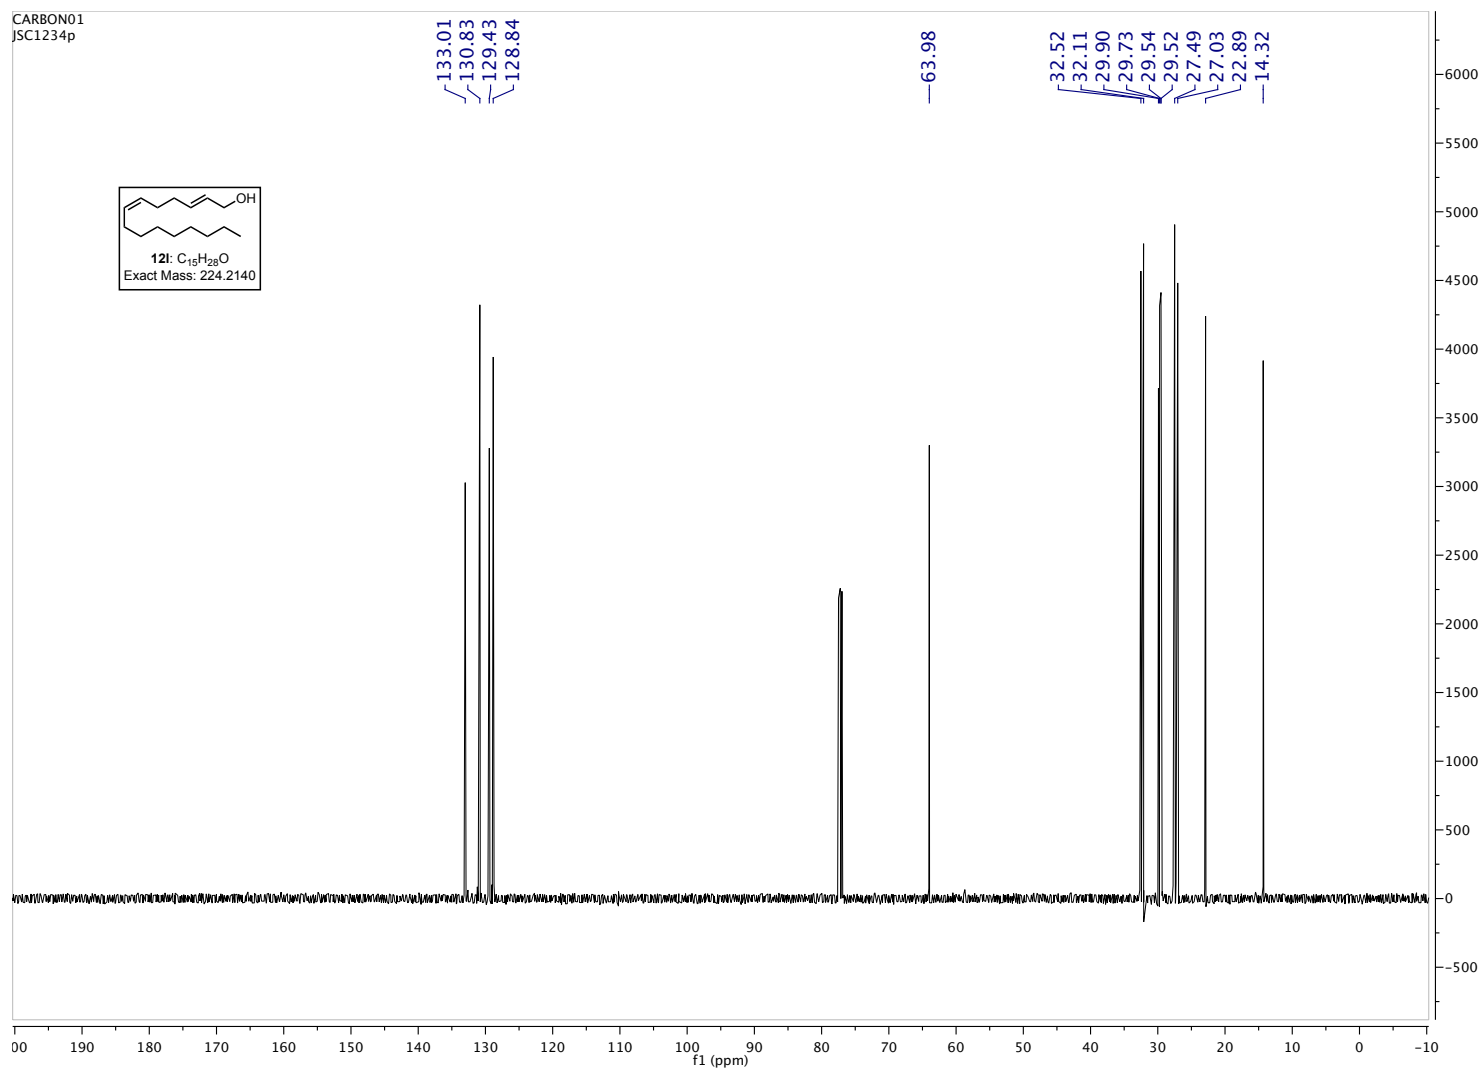

$^1\text{H}$  NMR (500 MHz,  $\text{CDCl}_3$ ) spectrum of compound **12p**.

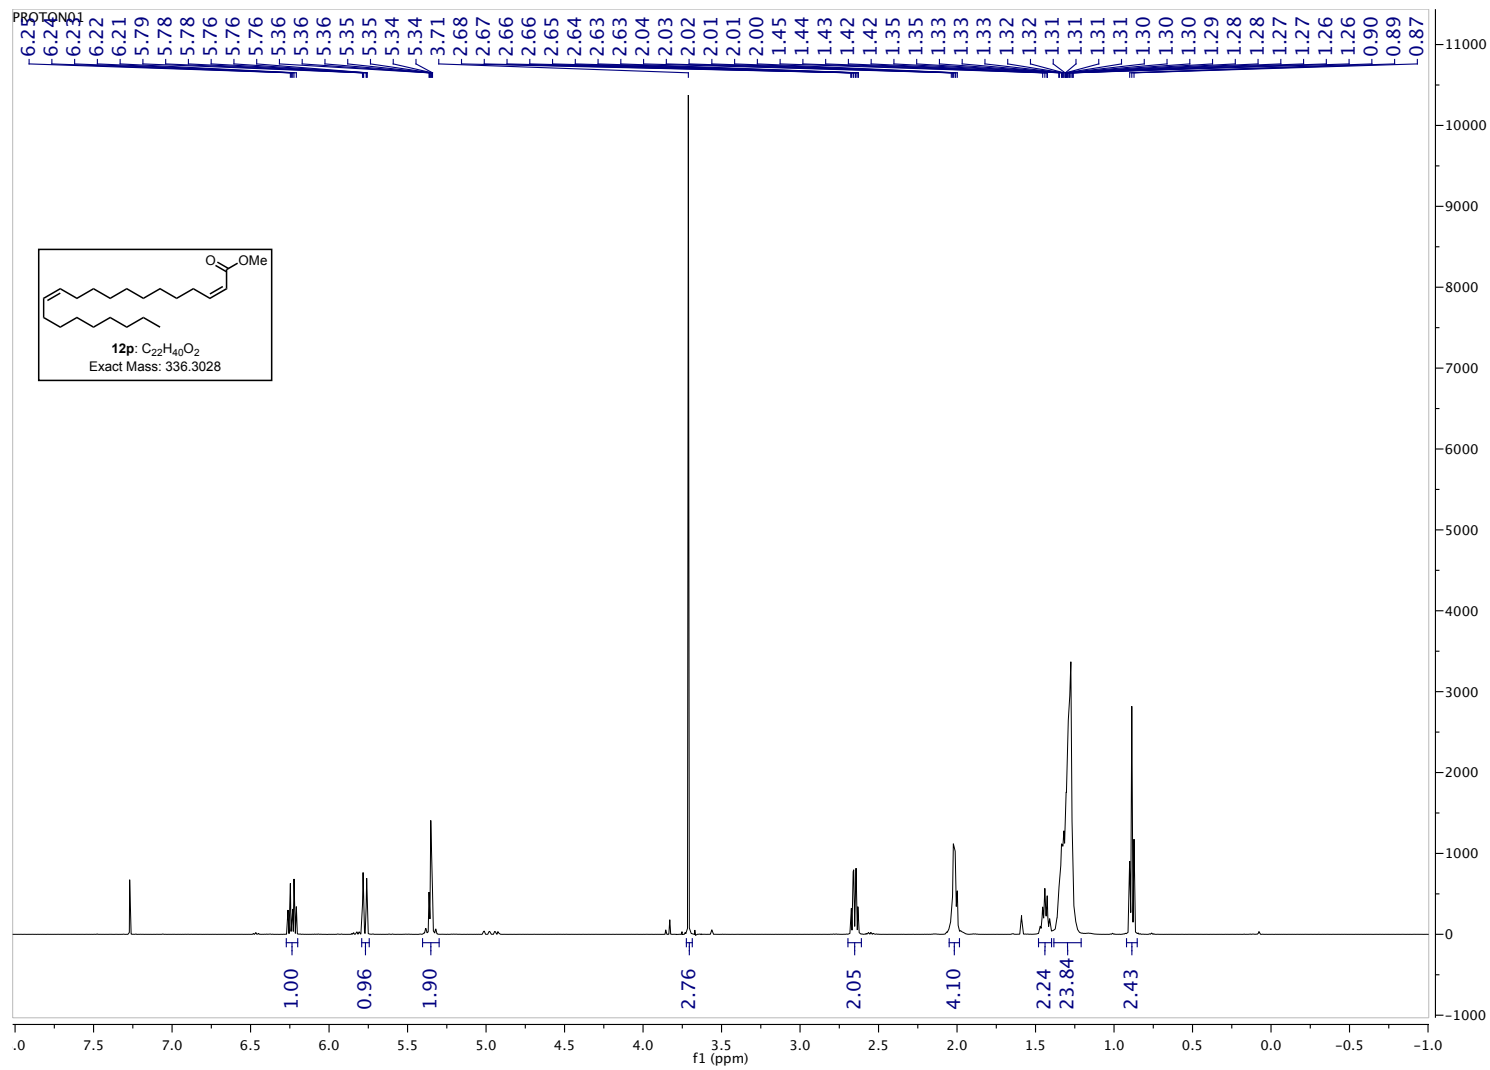

$^{13}\text{C}$  NMR (126 MHz,  $\text{CDCl}_3$ ) spectrum of compound **12p**.

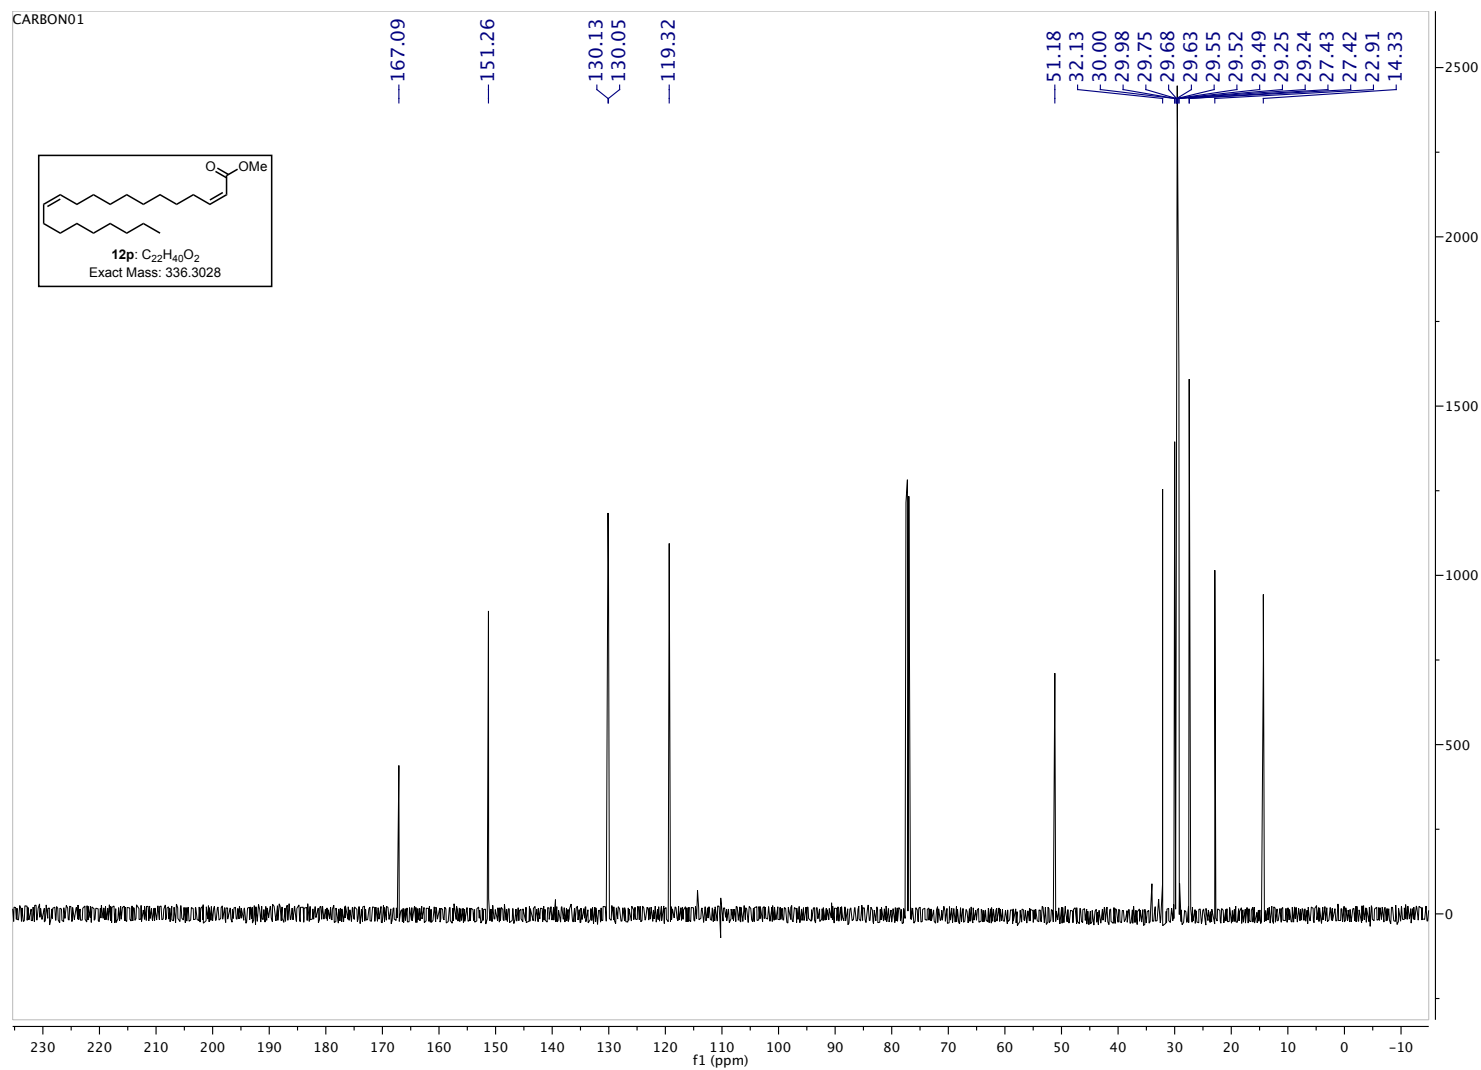

Supporting Information

Cannon, Grubbs

S36

$^1\text{H}$  NMR (500 MHz,  $\text{CDCl}_3$ ) spectrum of compound **12q**.

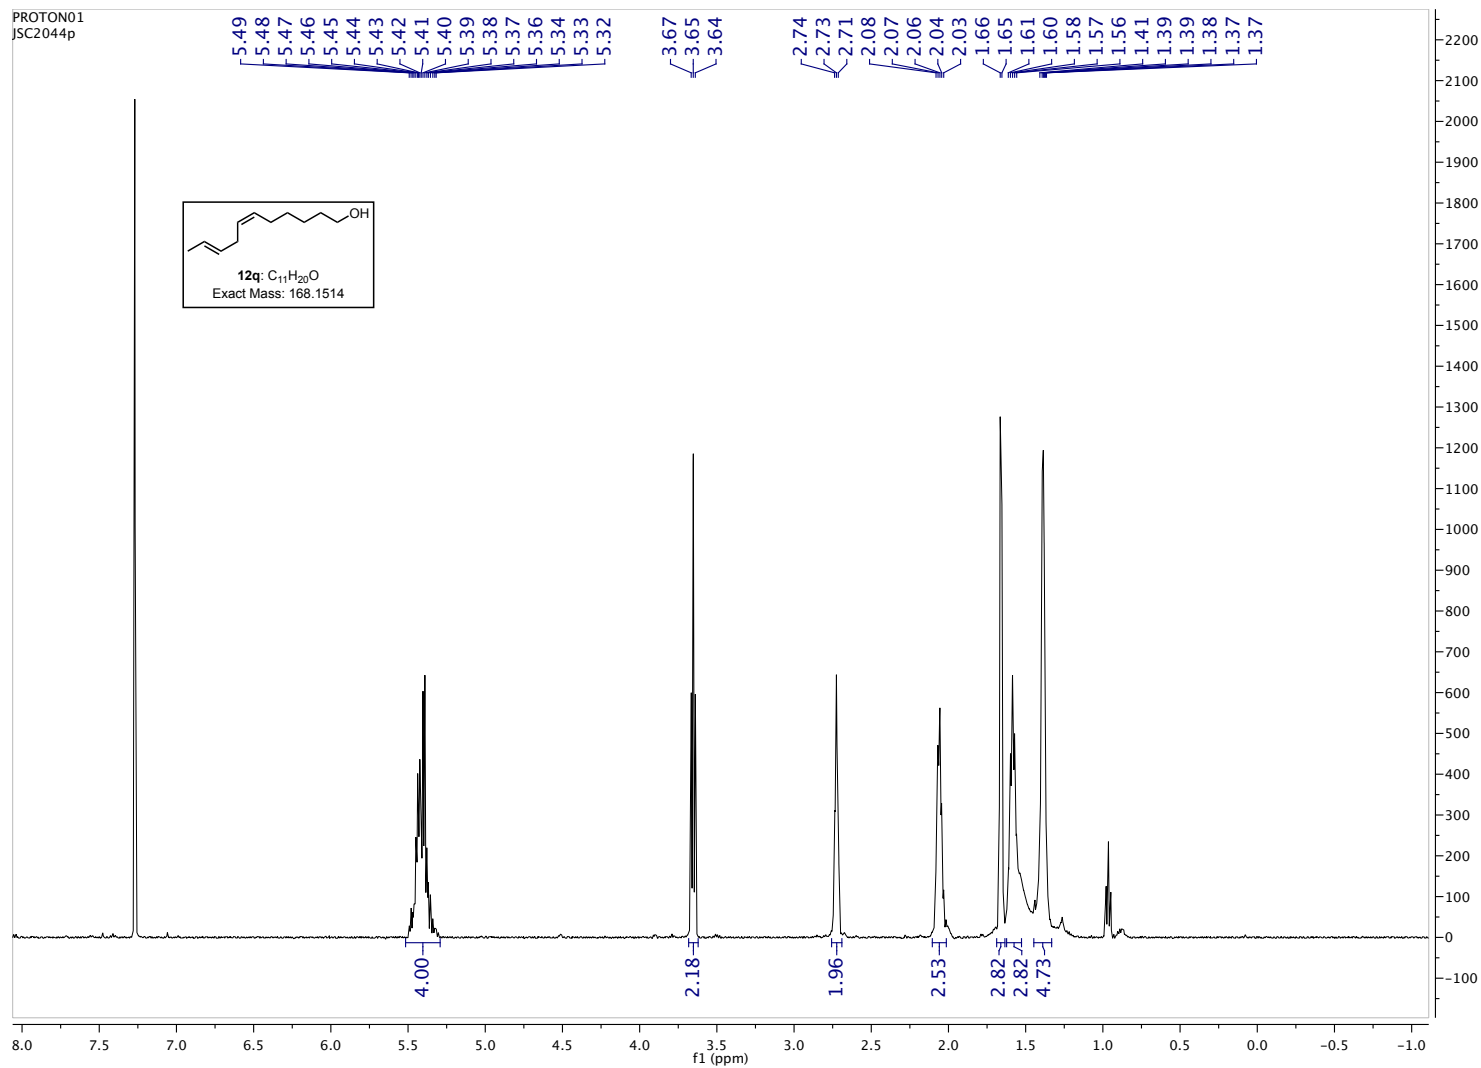

$^{13}\text{C}$  NMR (126 MHz,  $\text{CDCl}_3$ ) spectrum of compound **12q**.

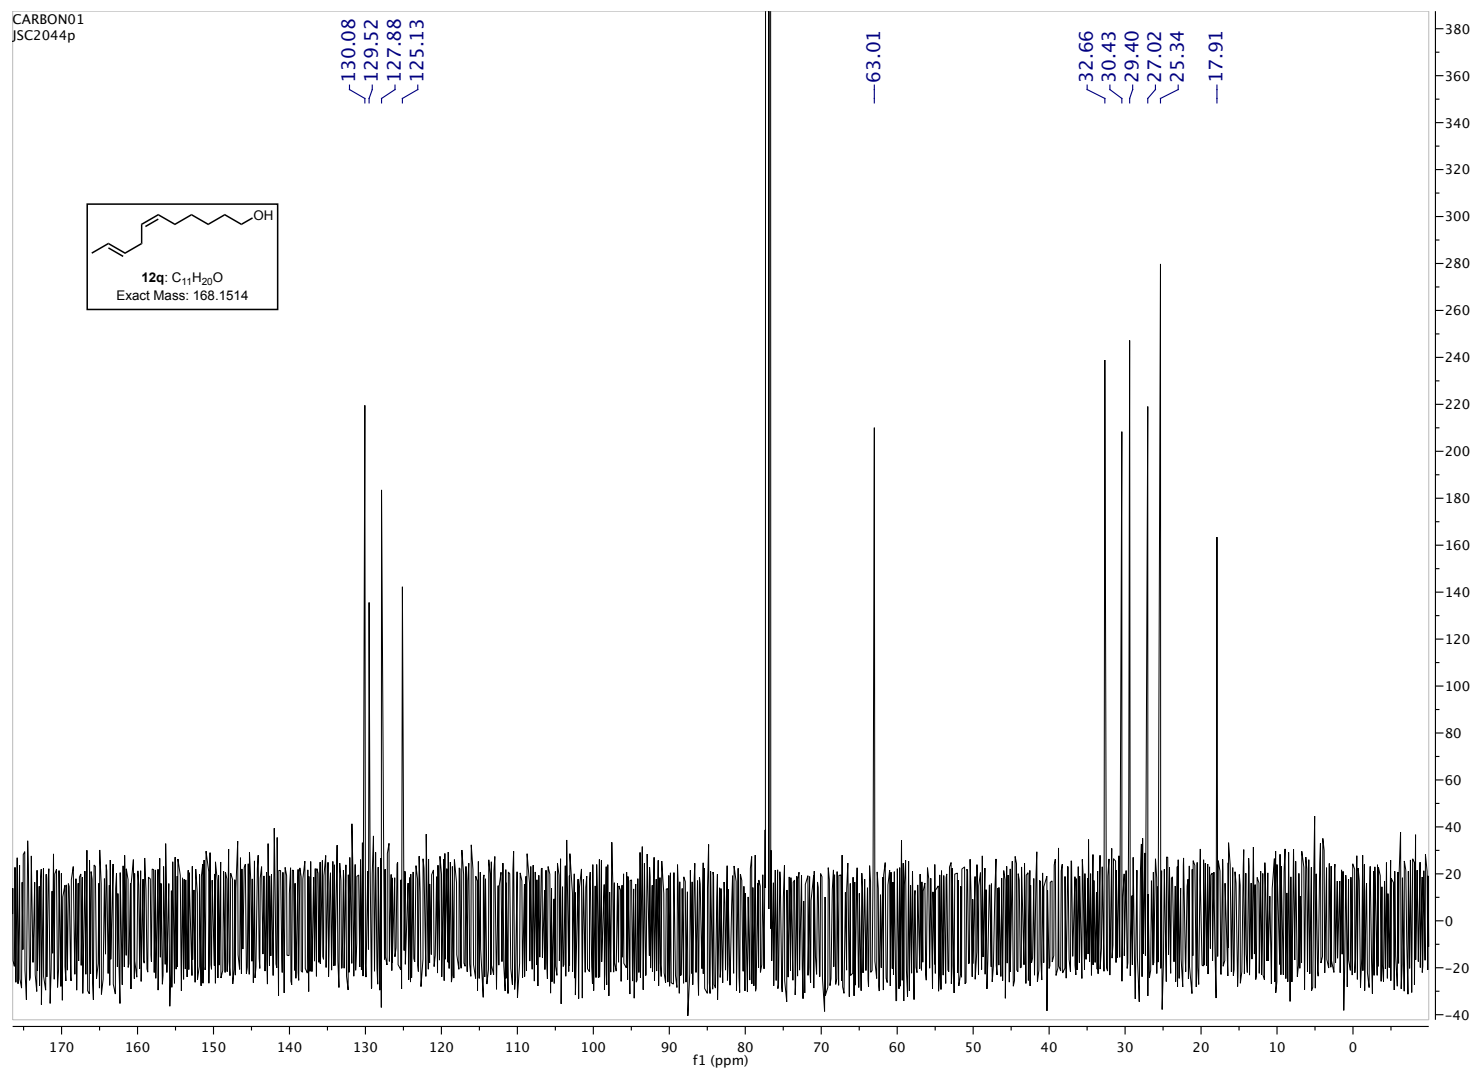

<sup>1</sup>H NMR (500 MHz, CDCl<sub>3</sub>) spectrum of compound **13b**.

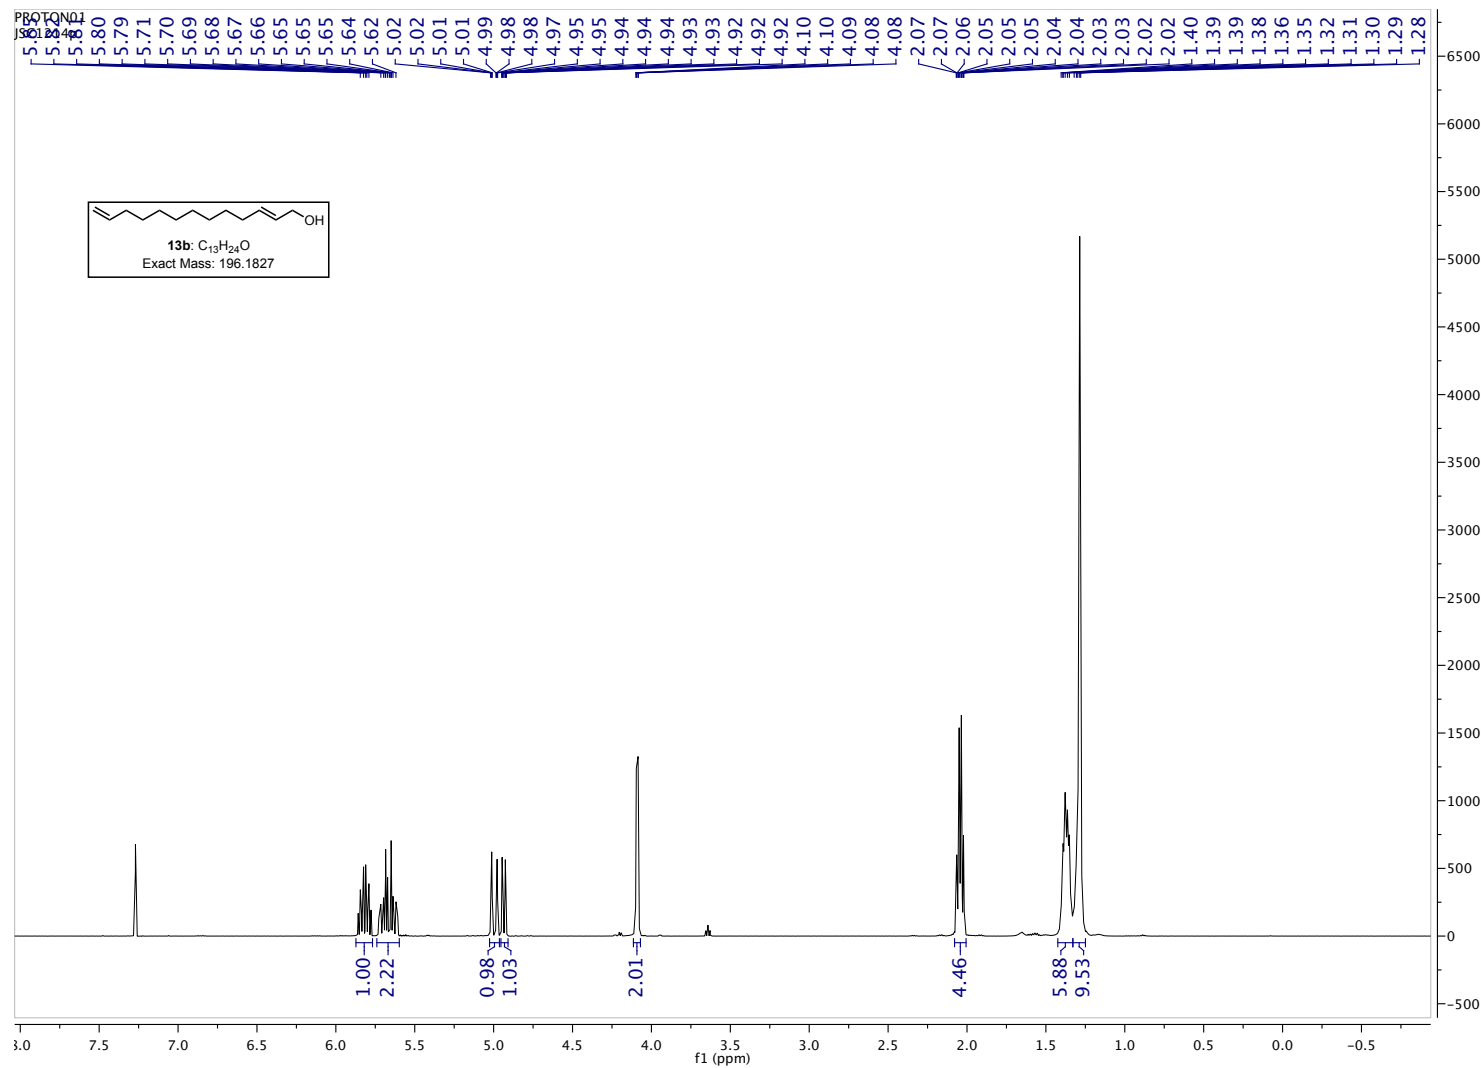

$^{13}\text{C}$  NMR (126 MHz,  $\text{CDCl}_3$ ) spectrum of compound **13b**.

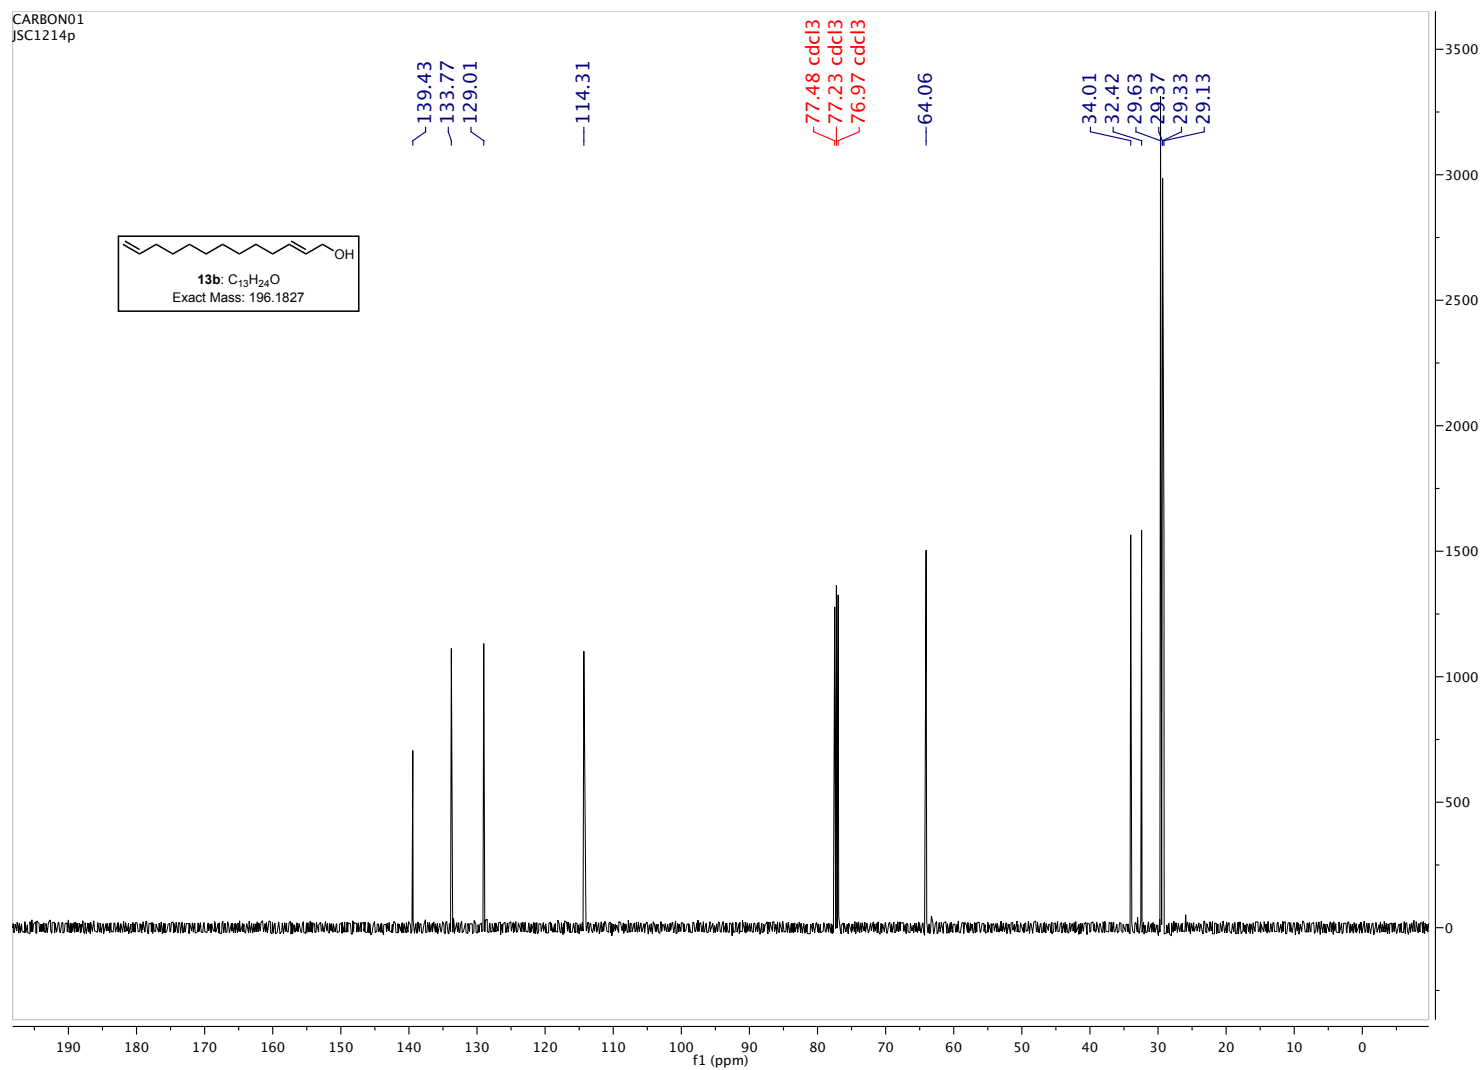



$^1\text{H}$  NMR (500 MHz,  $\text{CDCl}_3$ ) spectrum of compound **13g**.

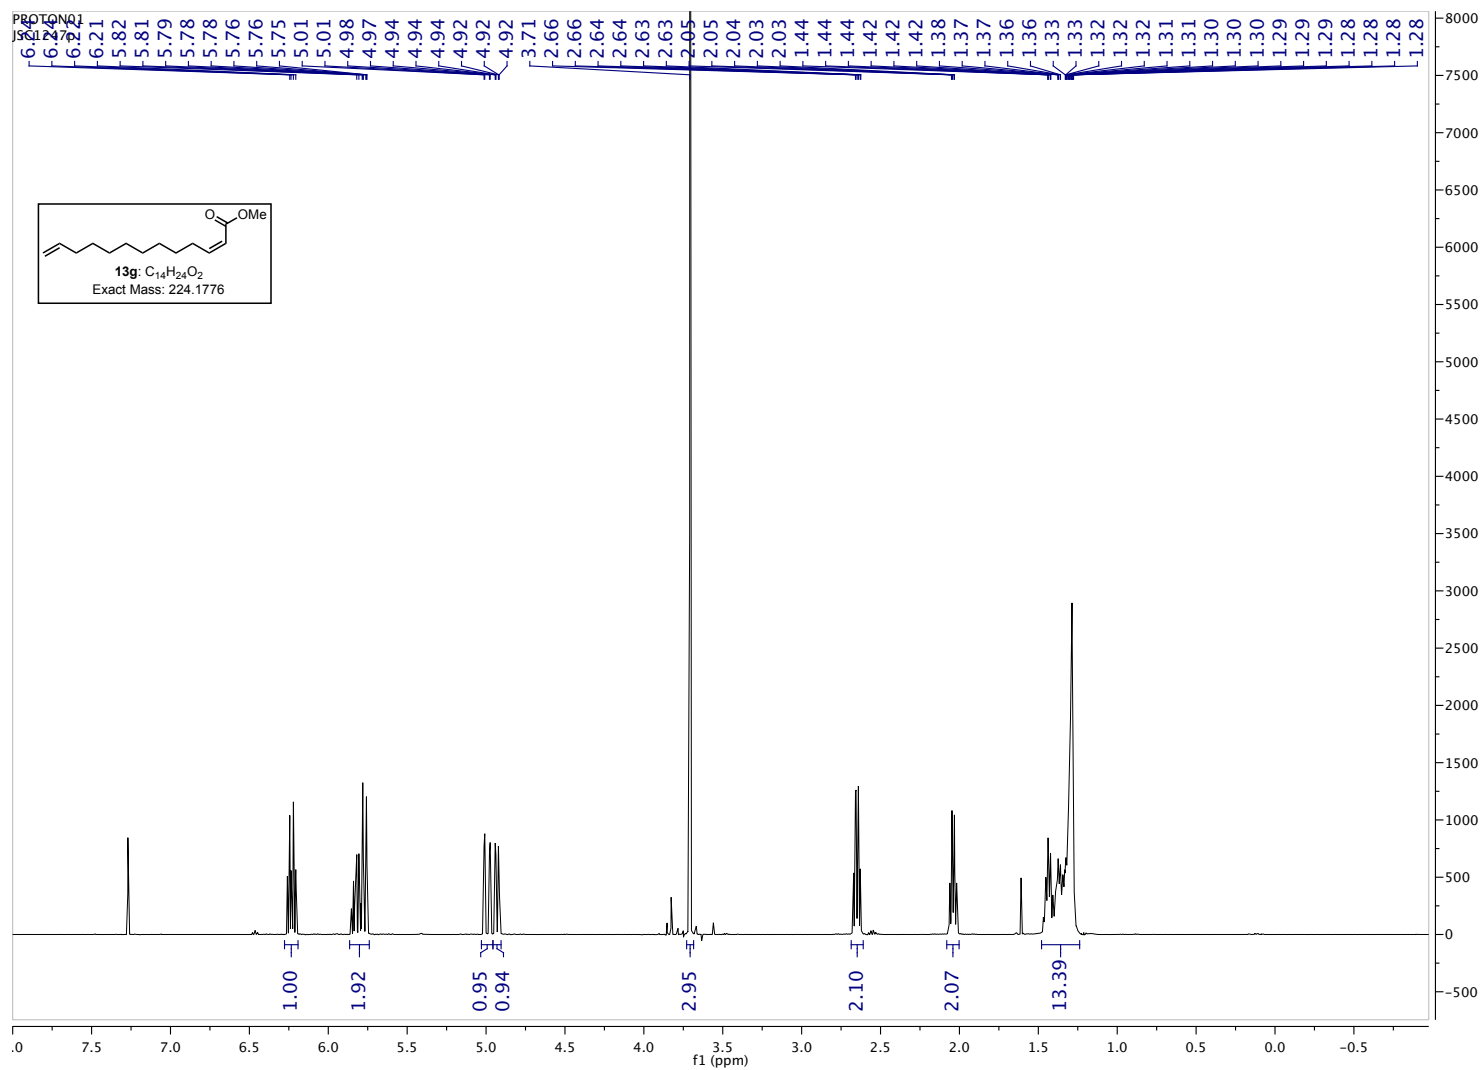

$^{13}\text{C}$  NMR (126 MHz,  $\text{CDCl}_3$ ) spectrum of compound **13g**.

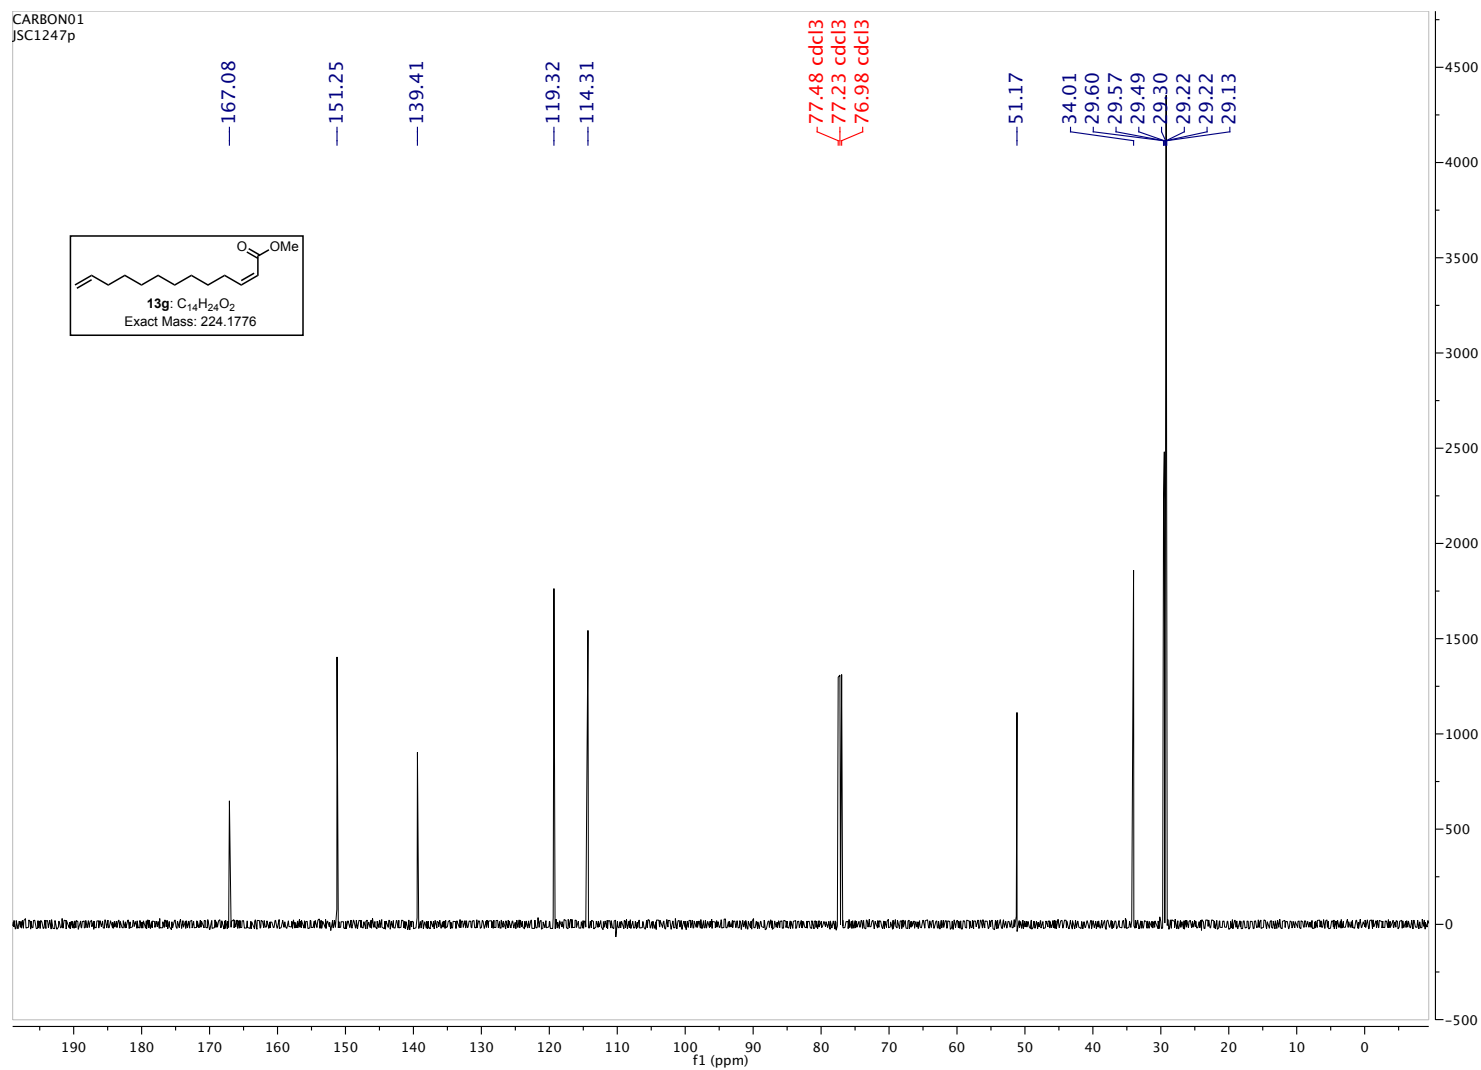

$^1\text{H}$  NMR (500 MHz,  $\text{CDCl}_3$ ) spectrum of compound **15**.

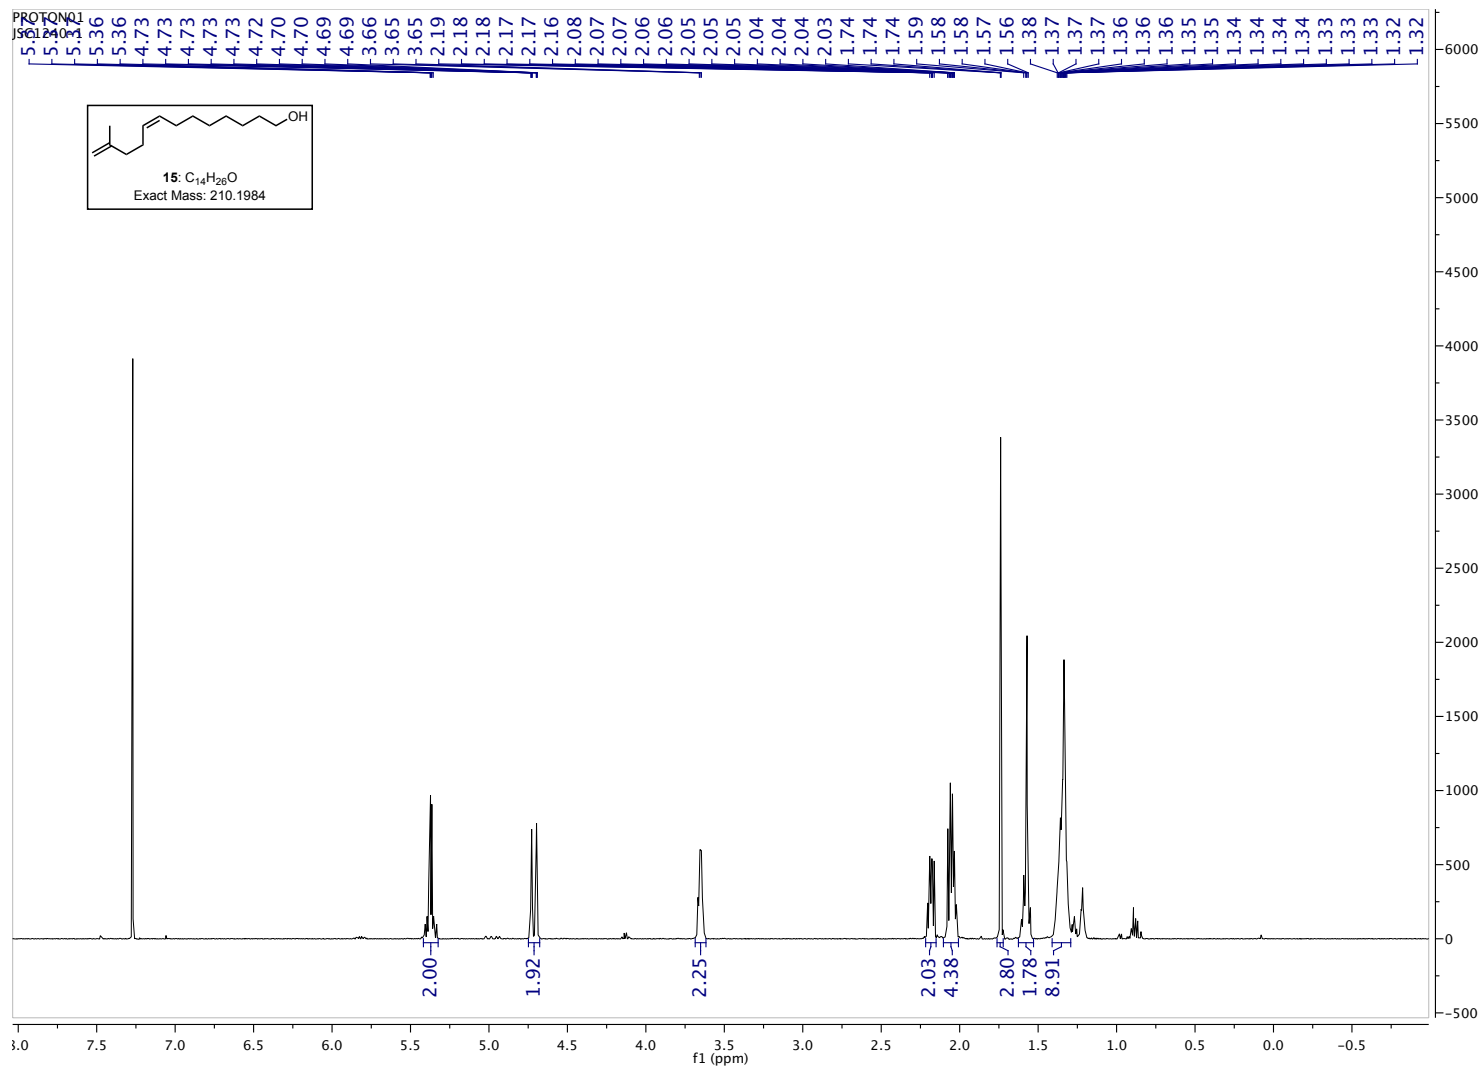

Supporting Information

Cannon, Grubbs

S43

$^{13}\text{C}$  NMR (126 MHz,  $\text{CDCl}_3$ ) spectrum of compound **15**.

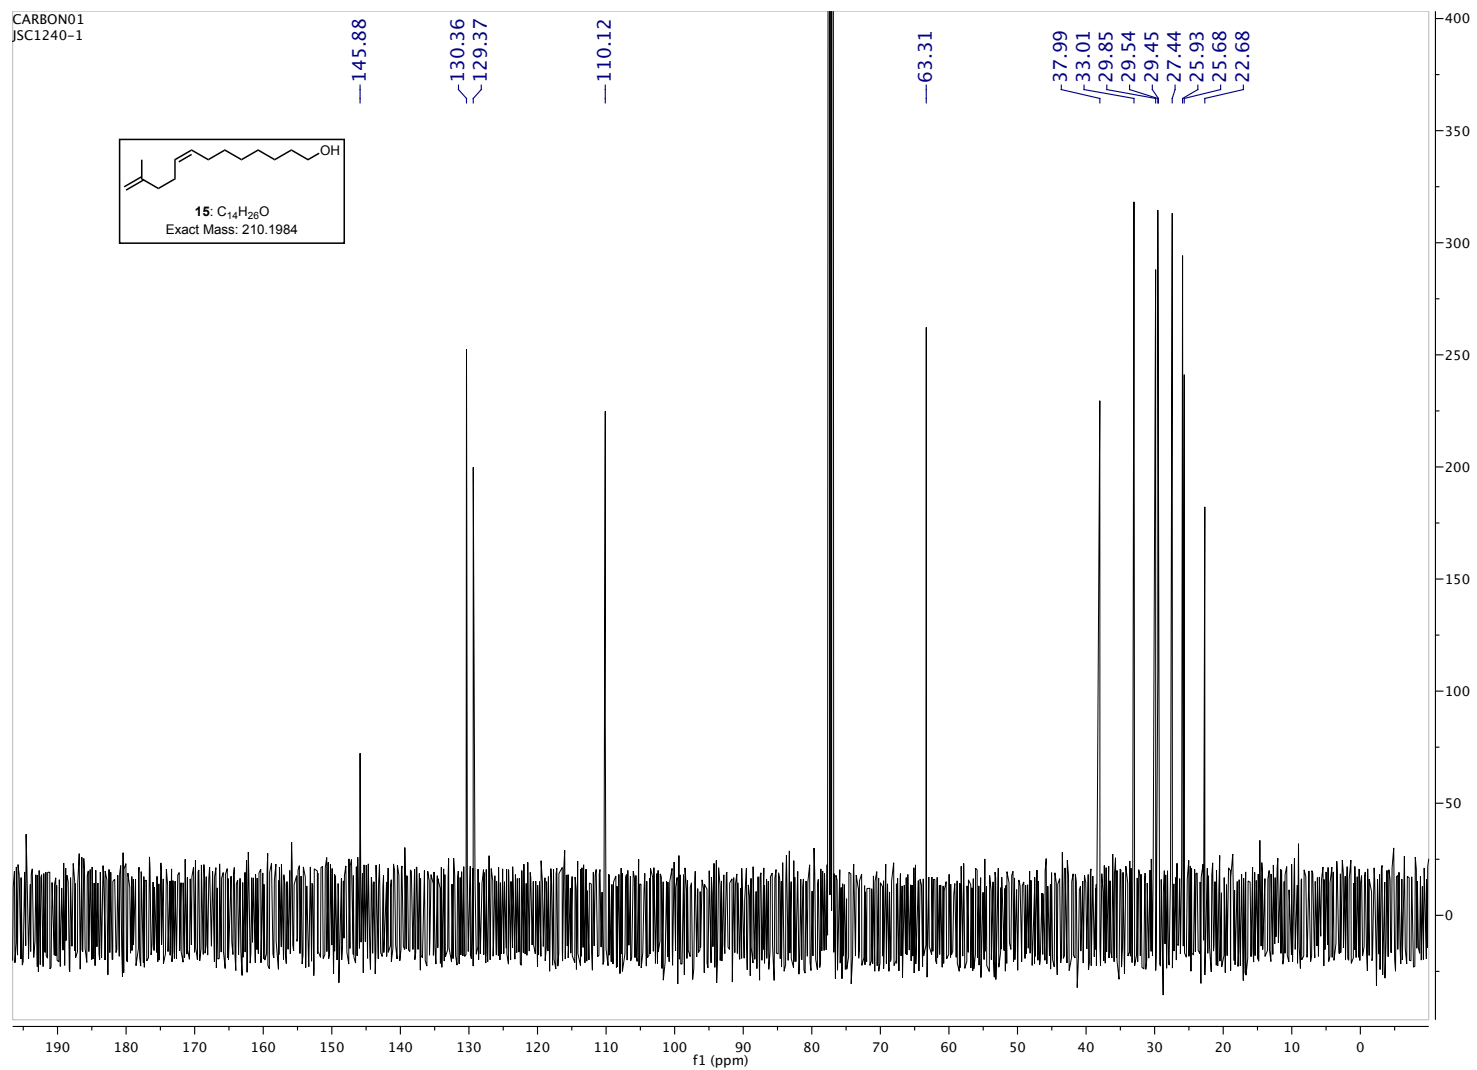

Supporting Information

Cannon, Grubbs

S44

$^1\text{H}$  NMR (500 MHz,  $\text{CDCl}_3$ ) spectrum of compound **17**.

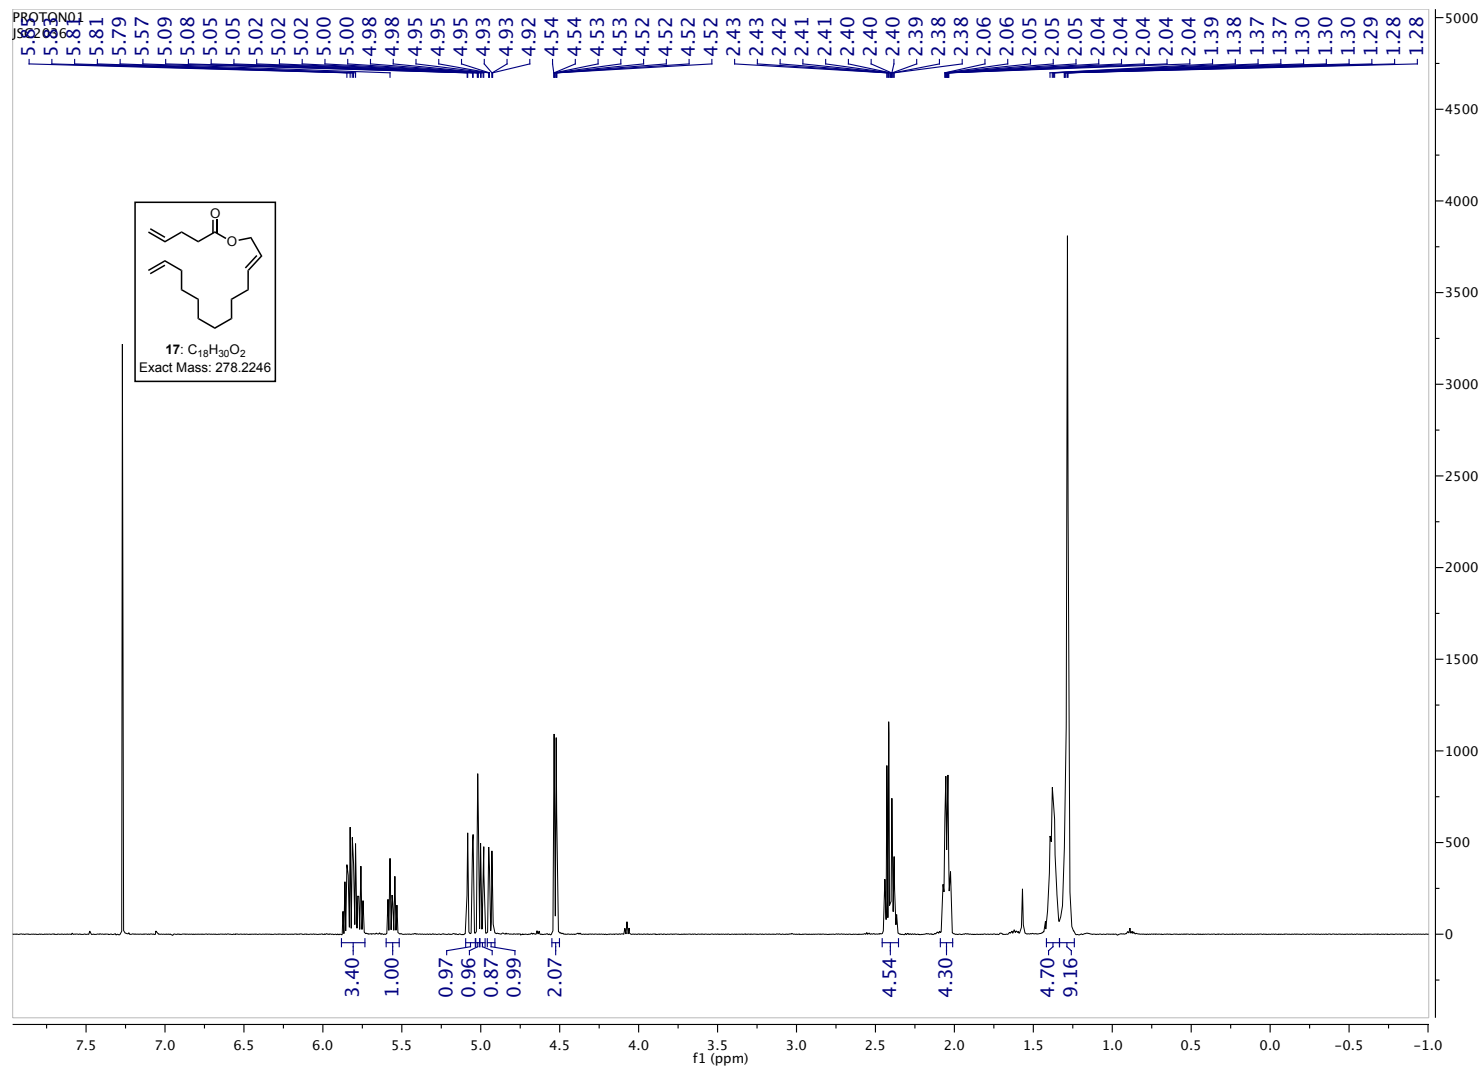

Supporting Information

Cannon, Grubbs

S45

$^{13}\text{C}$  NMR (126 MHz,  $\text{CDCl}_3$ ) spectrum of compound **17**.

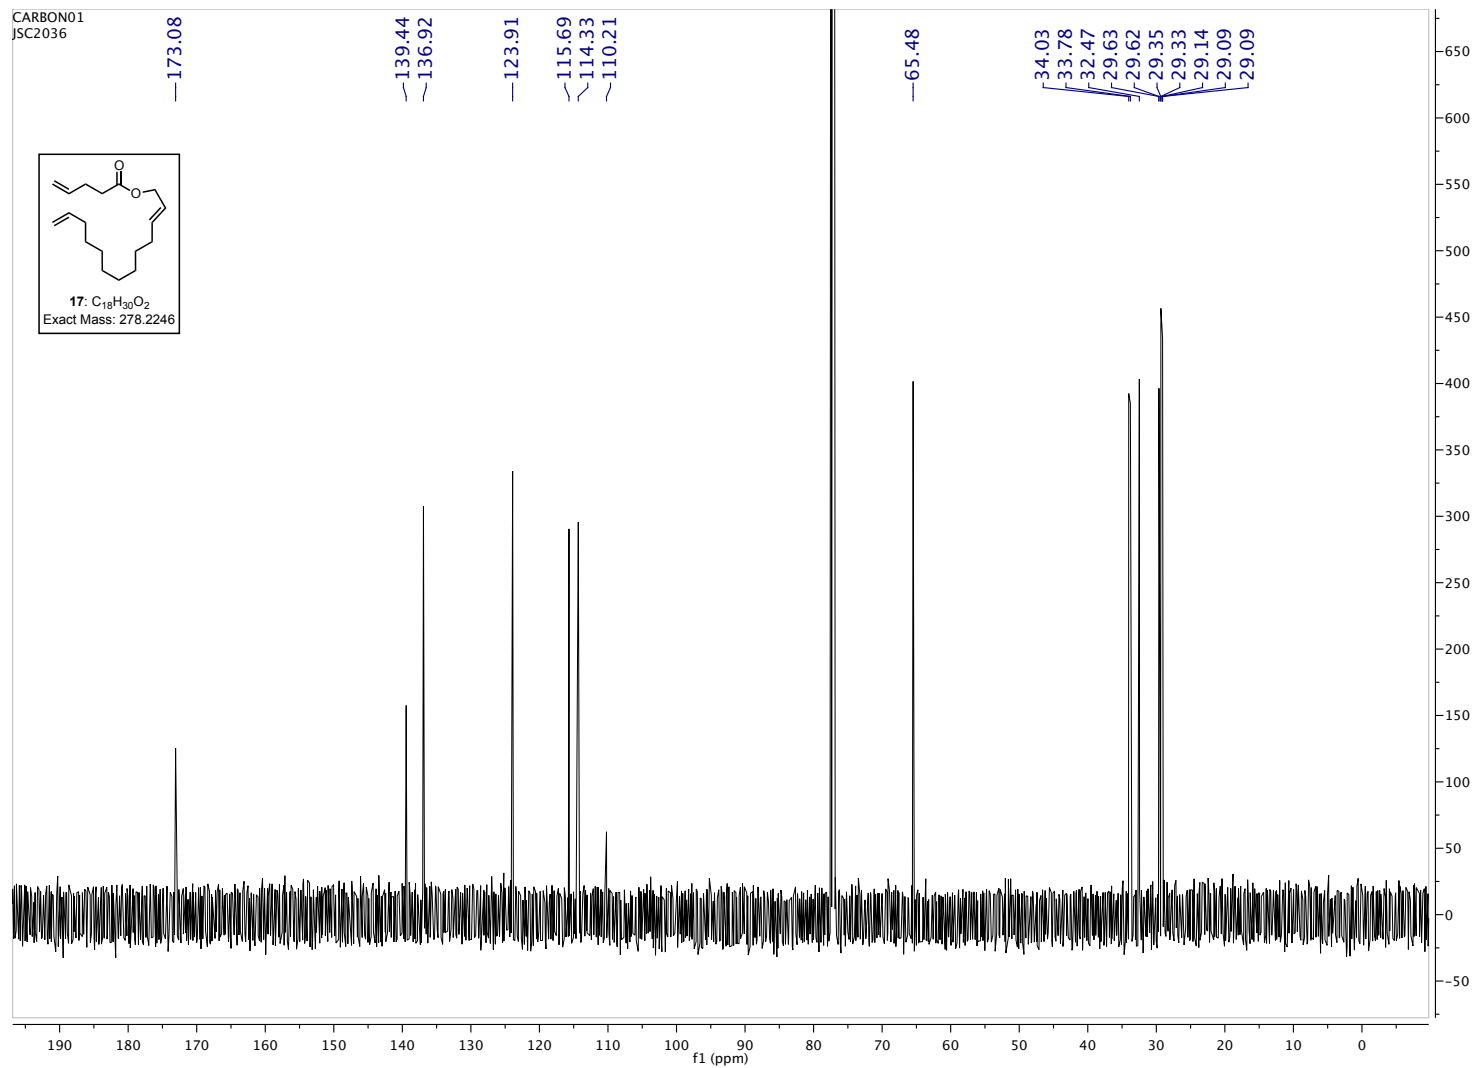

$^1\text{H}$  NMR (500 MHz,  $\text{CDCl}_3$ ) spectrum of compound **18**.

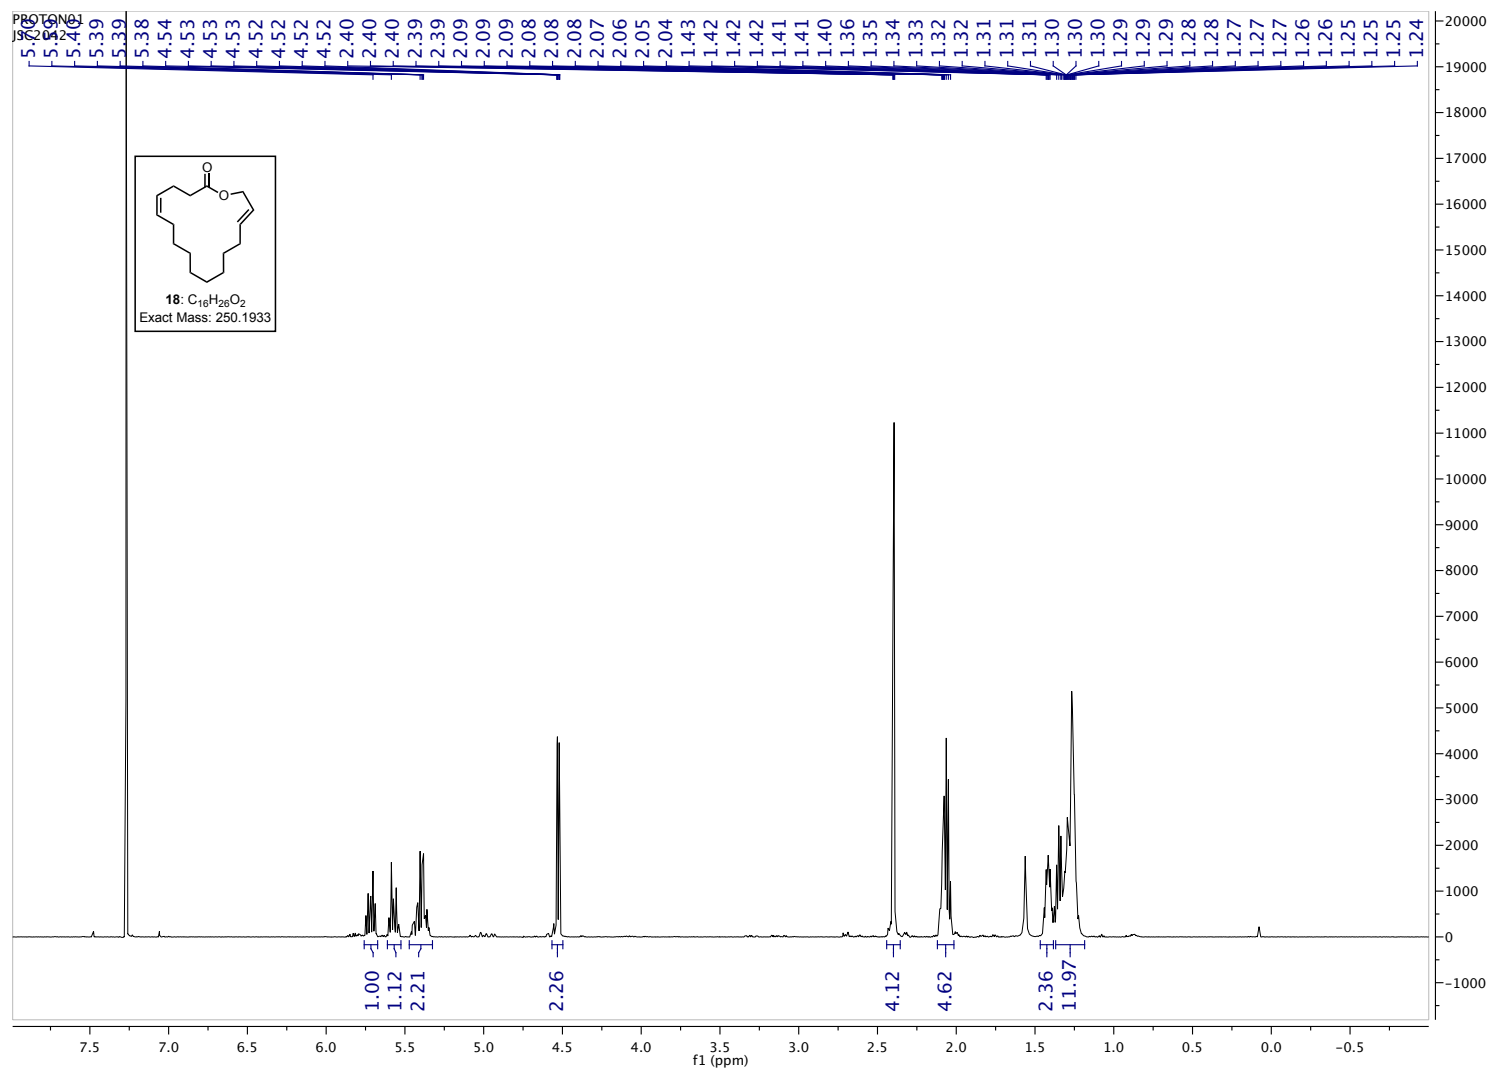

$^{13}\text{C}$  NMR (126 MHz,  $\text{CDCl}_3$ ) spectrum of compound **18**.

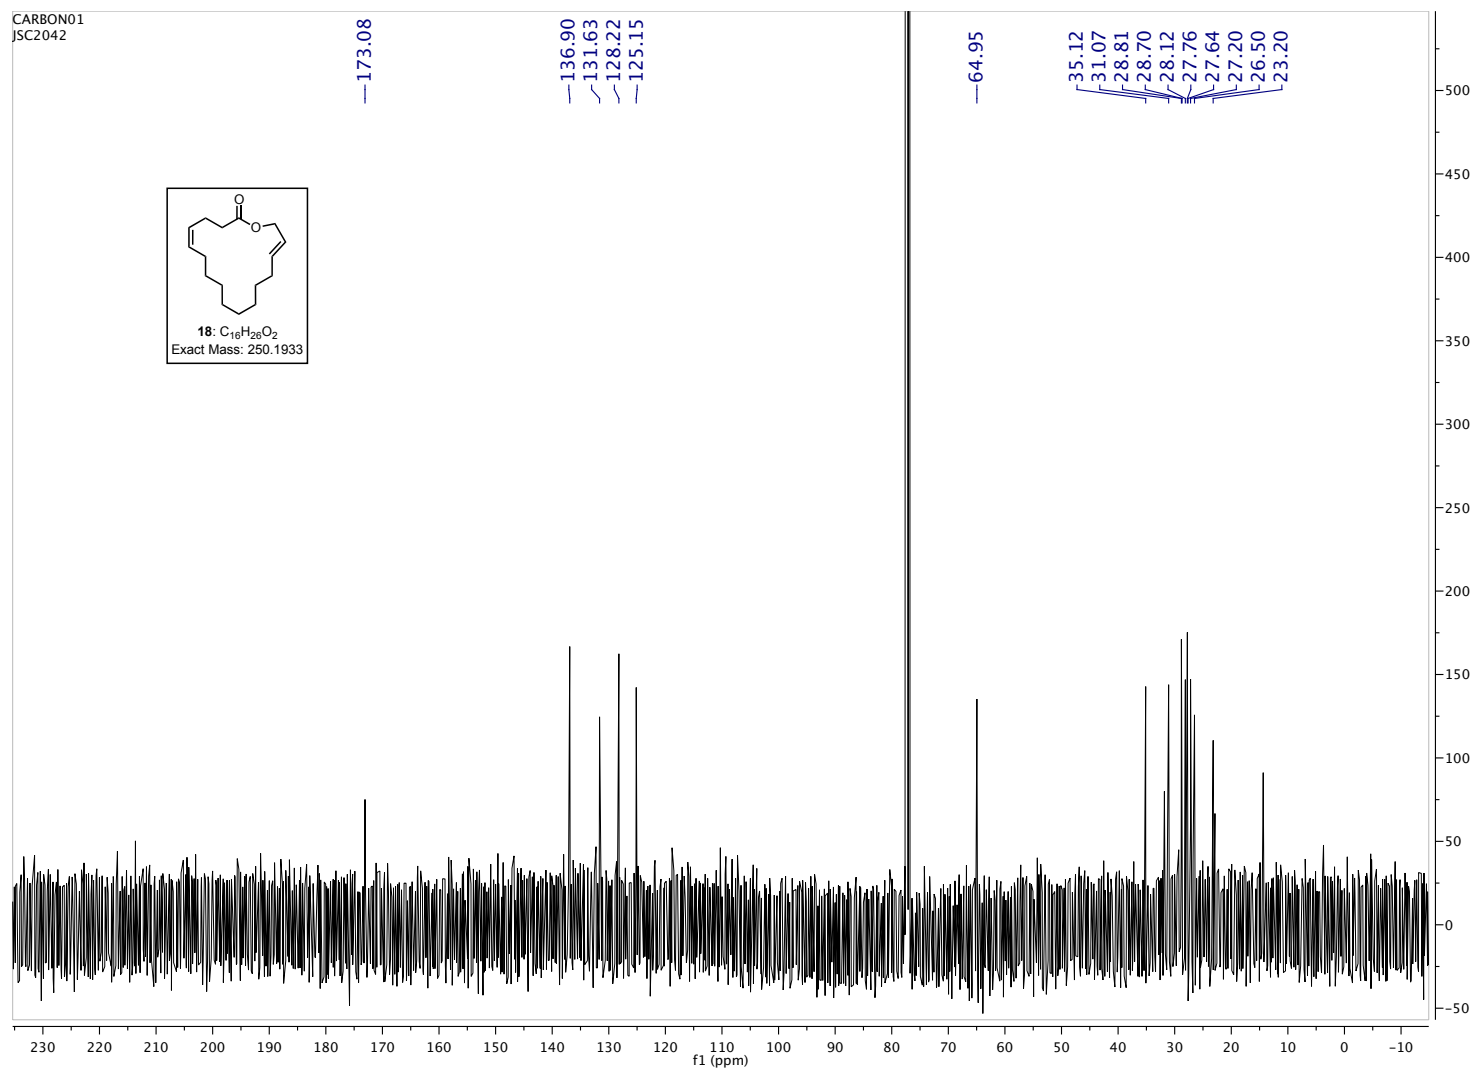



### Part 3. Gas Chromatograms of unpurified reaction mixtures:

Reaction of allyl methyl carbonate with catalyst 2:

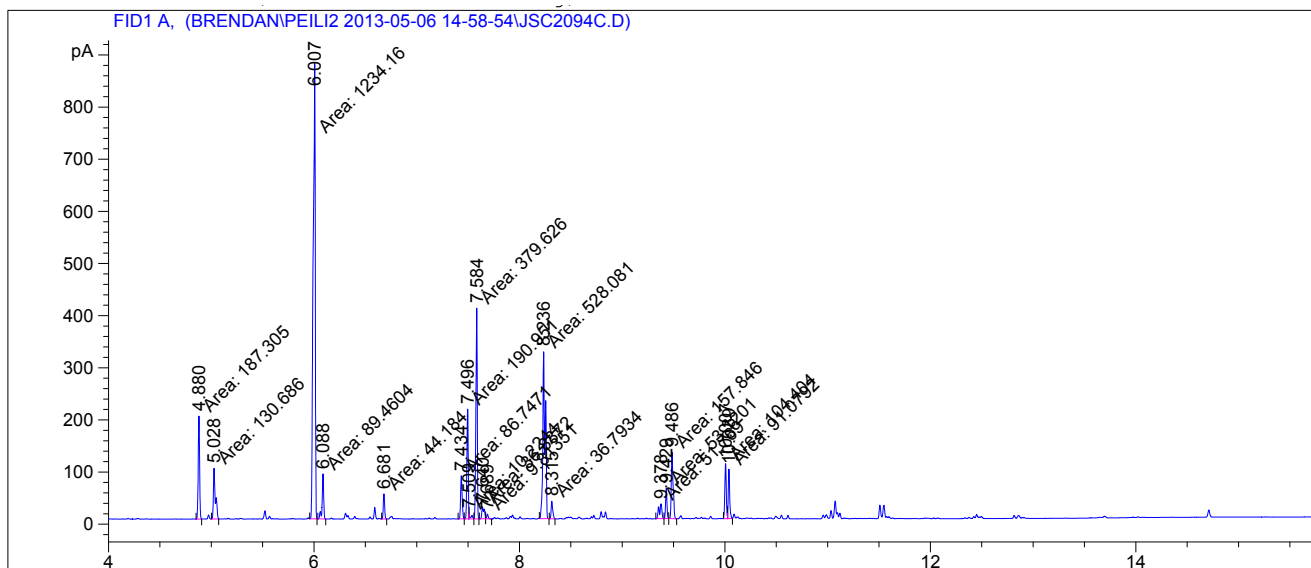

=====  
 Area Percent Report  
 =====

Sorted By : Signal  
 Multiplier : 1.0000  
 Dilution : 1.0000  
 Use Multiplier & Dilution Factor with ISTDs

Signal 1: FID1 A,

| Peak # | RetTime [min] | Type | Width [min] | Area [pA*s] | Height [pA] | Area %   |
|--------|---------------|------|-------------|-------------|-------------|----------|
| 1      | 4.880         | MM   | 0.0157      | 187.30486   | 198.48436   | 5.47173  |
| 2      | 5.028         | MM   | 0.0223      | 130.68591   | 97.57375    | 3.81772  |
| 3      | 6.007         | MM   | 0.0235      | 1234.16125  | 876.37933   | 36.05351 |
| 4      | 6.088         | MM   | 0.0171      | 89.46044    | 86.94088    | 2.61340  |
| 5      | 6.681         | MM   | 0.0152      | 44.18403    | 48.47345    | 1.29075  |
| 6      | 7.434         | MM   | 0.0174      | 86.74712    | 83.08228    | 2.53414  |
| 7      | 7.496         | MM   | 0.0150      | 190.95100   | 211.46515   | 5.57824  |
| 8      | 7.509         | MM   | 0.0153      | 10.22445    | 11.14959    | 0.29869  |
| 9      | 7.584         | MM   | 0.0156      | 379.62555   | 405.07065   | 11.08999 |
| 10     | 7.640         | MM   | 0.0266      | 36.88715    | 23.07720    | 1.07758  |
| 11     | 7.689         | MM   | 0.0178      | 9.81351     | 9.19254     | 0.28668  |
| 12     | 8.236         | MM   | 0.0274      | 528.08093   | 320.63898   | 15.42681 |
| 13     | 8.315         | MM   | 0.0181      | 36.79343    | 33.88400    | 1.07484  |
| 14     | 9.378         | MM   | 0.0302      | 51.76898    | 28.55096    | 1.51233  |
| 15     | 9.429         | MM   | 0.0151      | 53.12011    | 58.72219    | 1.55180  |
| 16     | 9.486         | MM   | 0.0206      | 157.84572   | 127.74446   | 4.61114  |
| 17     | 10.007        | MM   | 0.0164      | 104.40427   | 106.17732   | 3.04996  |
| 18     | 10.039        | MM   | 0.0158      | 91.07923    | 95.94094    | 2.66069  |



# Compound 12b

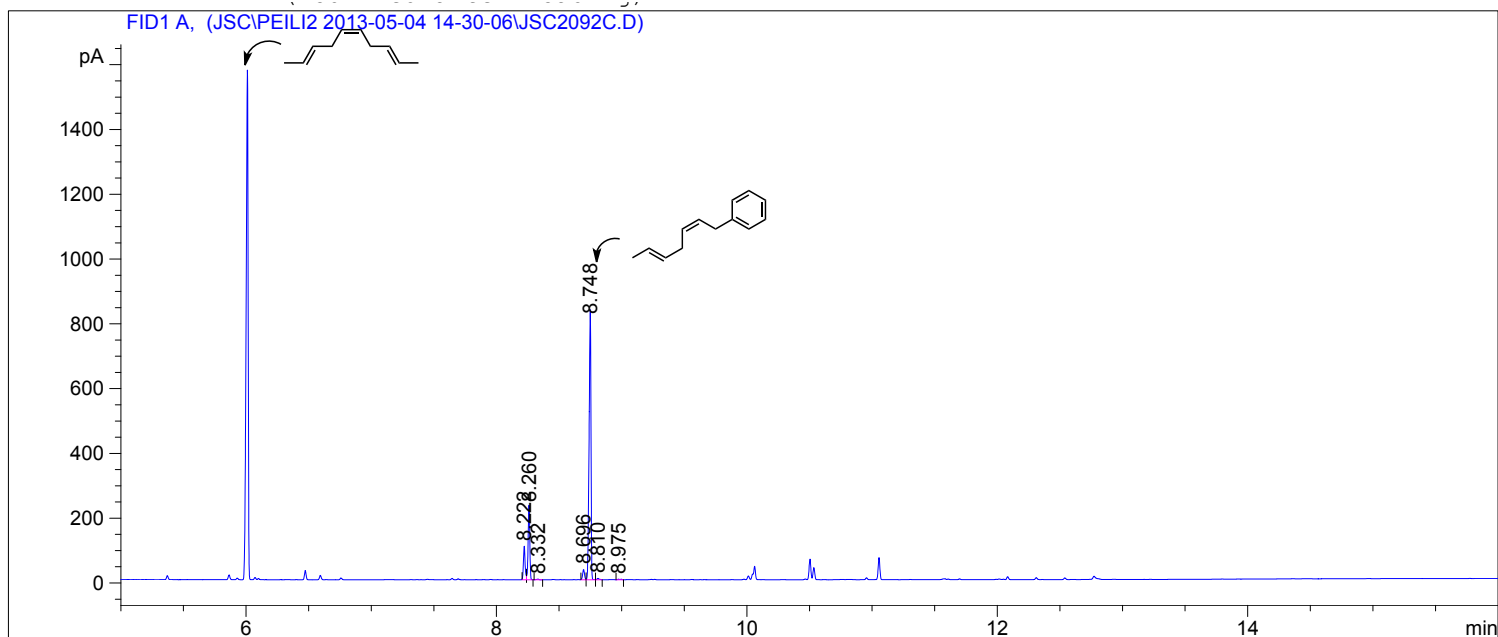

## Area Percent Report

Sorted By : Signal  
Multiplier : 1.0000  
Dilution : 1.0000  
Use Multiplier & Dilution Factor with ISTDs

Signal 1: FID1 A,

| Peak # | RetTime [min] | Type | Width [min] | Area [pA*s] | Height [pA] | Area %   |
|--------|---------------|------|-------------|-------------|-------------|----------|
| 1      | 8.222         | BV   | 0.0140      | 96.11469    | 101.92526   | 7.90367  |
| 2      | 8.260         | VB   | 0.0151      | 211.75037   | 223.46384   | 17.41259 |
| 3      | 8.332         | BB   | 0.0181      | 2.21064     | 1.83542     | 0.18178  |
| 4      | 8.696         | BV   | 0.0164      | 32.63651    | 30.82909    | 2.68376  |
| 5      | 8.748         | VV   | 0.0176      | 865.78290   | 803.49988   | 71.19481 |
| 6      | 8.810         | VB   | 0.0185      | 4.77008     | 3.84769     | 0.39225  |
| 7      | 8.975         | BB   | 0.0259      | 2.81074     | 1.49441     | 0.23113  |



# Compound 12d

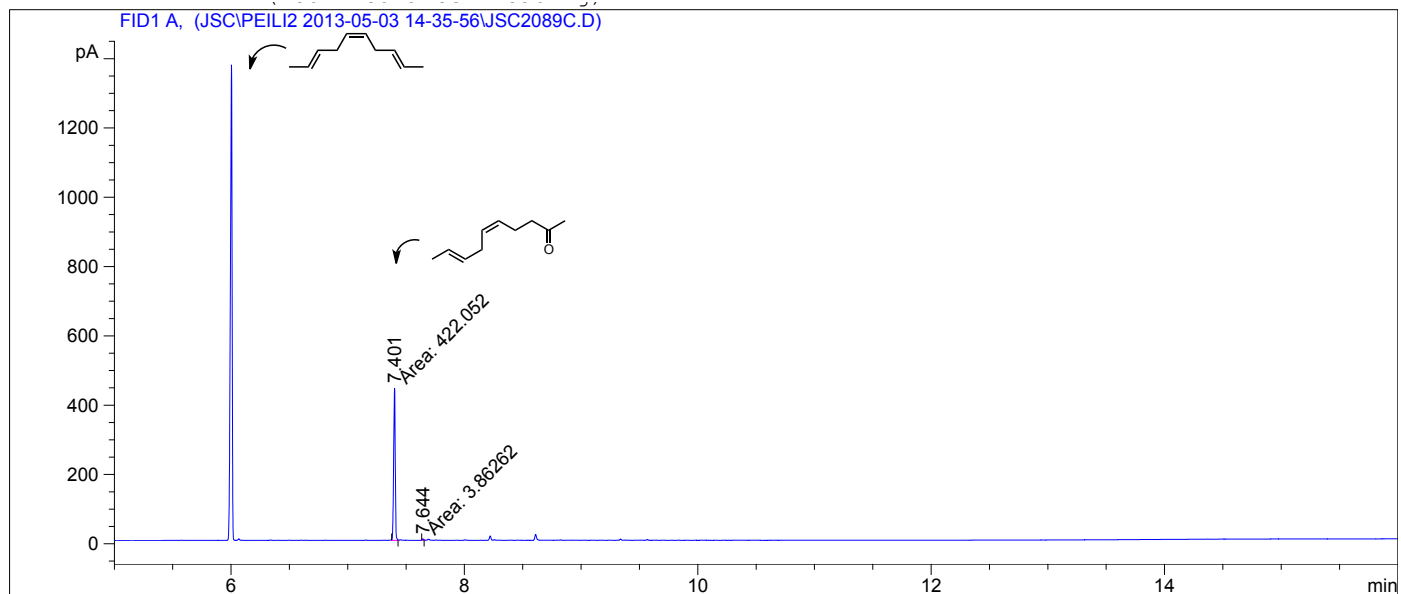

## Area Percent Report

Sorted By : Signal  
Multiplier : 1.0000  
Dilution : 1.0000  
Use Multiplier & Dilution Factor with ISTDs

Signal 1: FID1 A,

| Peak # | RetTime [min] | Type | Width [min] | Area [pA*s] | Height [pA] | Area %   |
|--------|---------------|------|-------------|-------------|-------------|----------|
| 1      | 7.401         | MM   | 0.0160      | 422.05228   | 440.50253   | 99.09310 |
| 2      | 7.644         | MM   | 0.0142      | 3.86262     | 4.52266     | 0.90690  |

Totals : 425.91489 445.02519

# Compound 12e

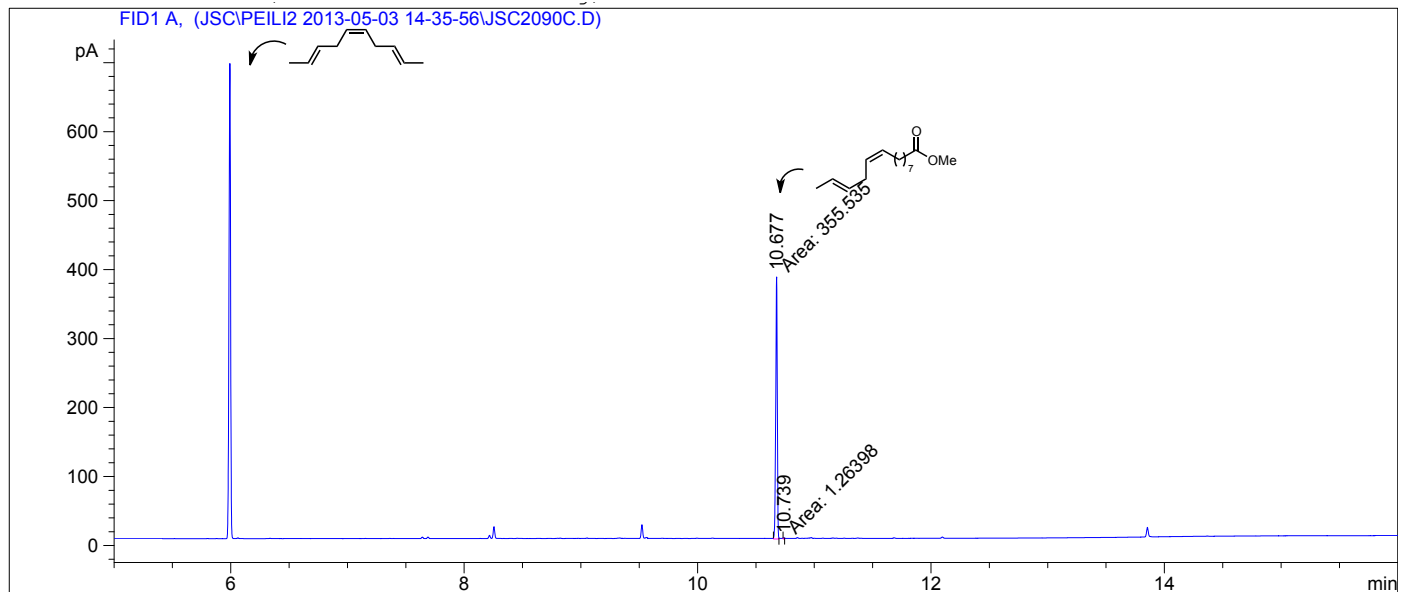

=====  
 Area Percent Report  
 =====

Sorted By : Signal  
 Multiplier : 1.0000  
 Dilution : 1.0000  
 Use Multiplier & Dilution Factor with ISTDs

Signal 1: FID1 A,

| Peak # | RetTime [min] | Type | Width [min] | Area [pA*s] | Height [pA] | Area %   |
|--------|---------------|------|-------------|-------------|-------------|----------|
| 1      | 10.677        | MM   | 0.0155      | 355.53497   | 381.70740   | 99.64574 |
| 2      | 10.739        | MM   | 0.0121      | 1.26398     | 1.74760     | 0.35426  |

Totals : 356.79896 383.45499

Compound **12f**

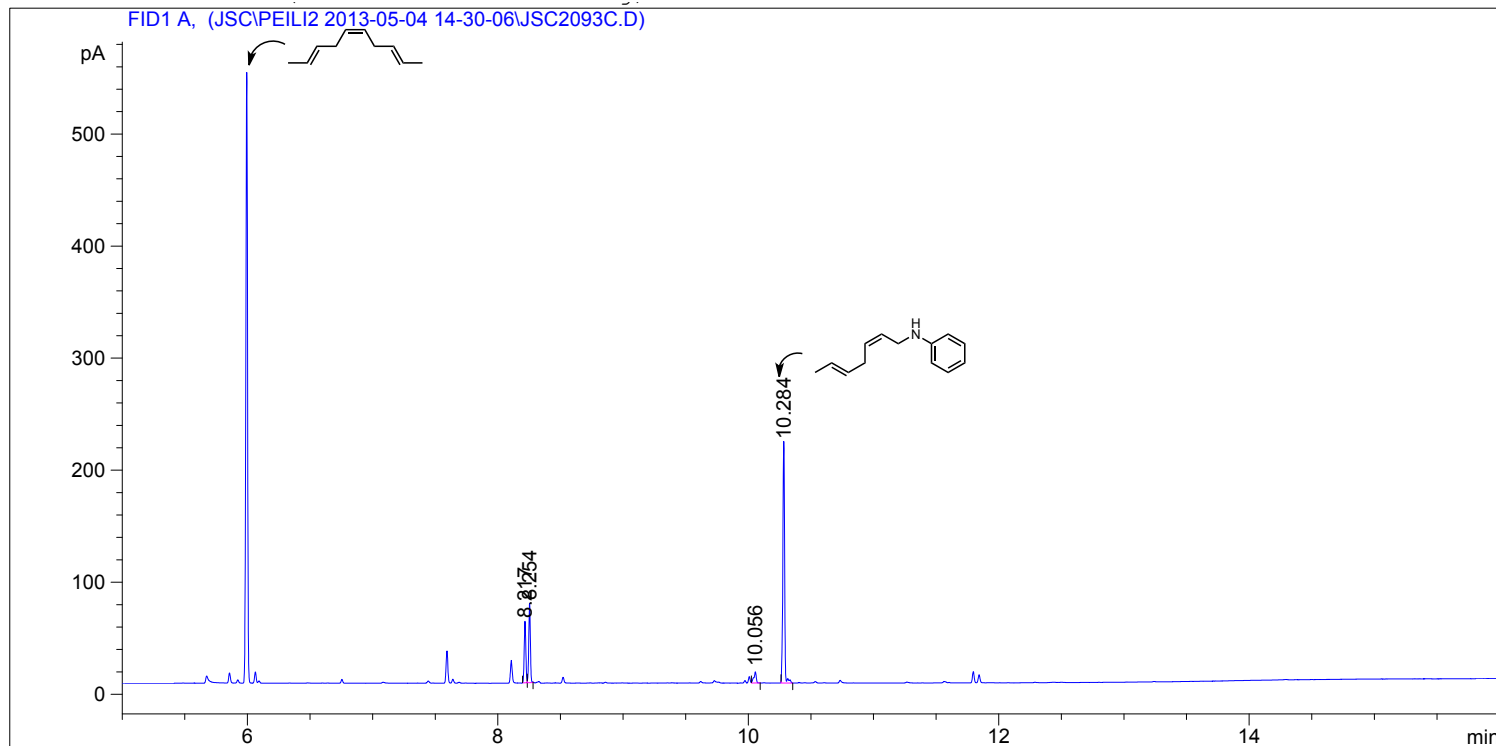

=====  
 Area Percent Report  
 =====

Sorted By : Signal  
 Multiplier : 1.0000  
 Dilution : 1.0000  
 Use Multiplier & Dilution Factor with ISTDs

Signal 1: FID1 A,

| Peak # | RetTime [min] | Type | Width [min] | Area [pA*s] | Height [pA] | Area %   |
|--------|---------------|------|-------------|-------------|-------------|----------|
| 1      | 8.217         | BV   | 0.0148      | 49.03390    | 53.11898    | 14.52418 |
| 2      | 8.254         | VB   | 0.0147      | 62.72197    | 68.66196    | 18.57868 |
| 3      | 10.056        | VB   | 0.0199      | 13.20779    | 9.69418     | 3.91224  |
| 4      | 10.284        | BB   | 0.0157      | 212.63818   | 212.74730   | 62.98490 |

# Compound 12g

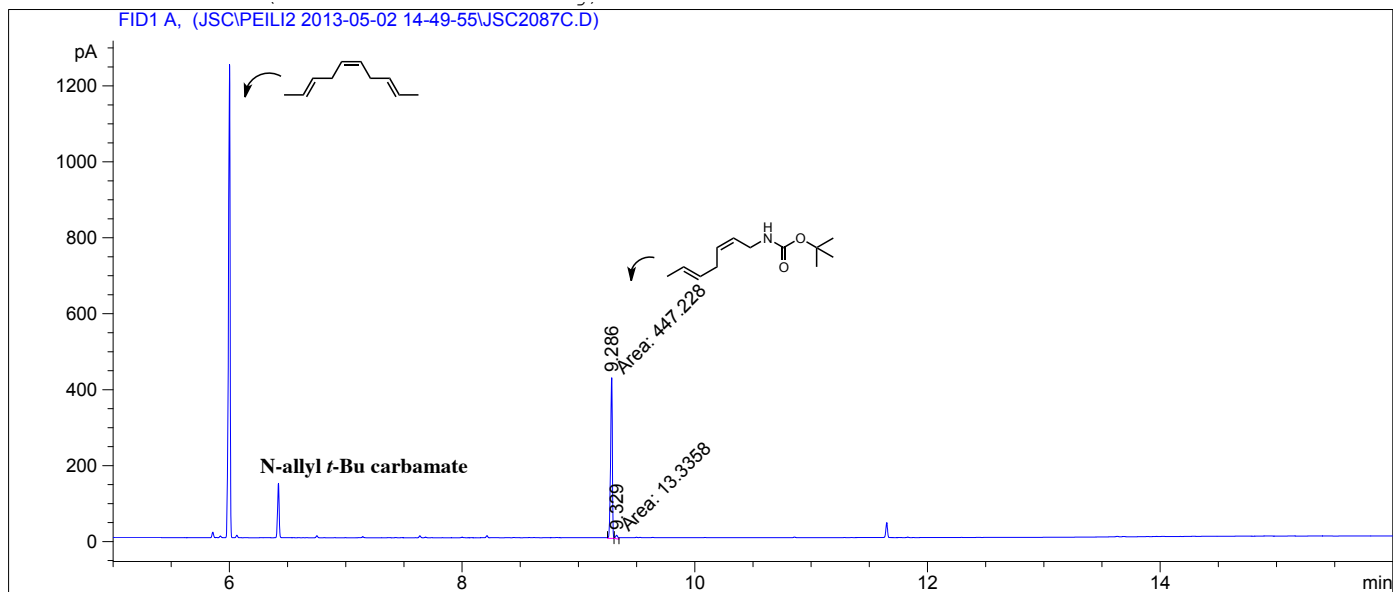

=====  
 Area Percent Report  
 =====

Sorted By : Signal  
 Multiplier : 1.0000  
 Dilution : 1.0000  
 Use Multiplier & Dilution Factor with ISTDs

Signal 1: FID1 A,

| Peak # | RetTime [min] | Type | Width [min] | Area [pA*s] | Height [pA] | Area %   |
|--------|---------------|------|-------------|-------------|-------------|----------|
| 1      | 9.286         | MM   | 0.0176      | 447.22815   | 423.34912   | 97.10447 |
| 2      | 9.329         | MM   | 0.0237      | 13.33575    | 9.37145     | 2.89553  |

Totals : 460.56390 432.72057



# Compound 12h

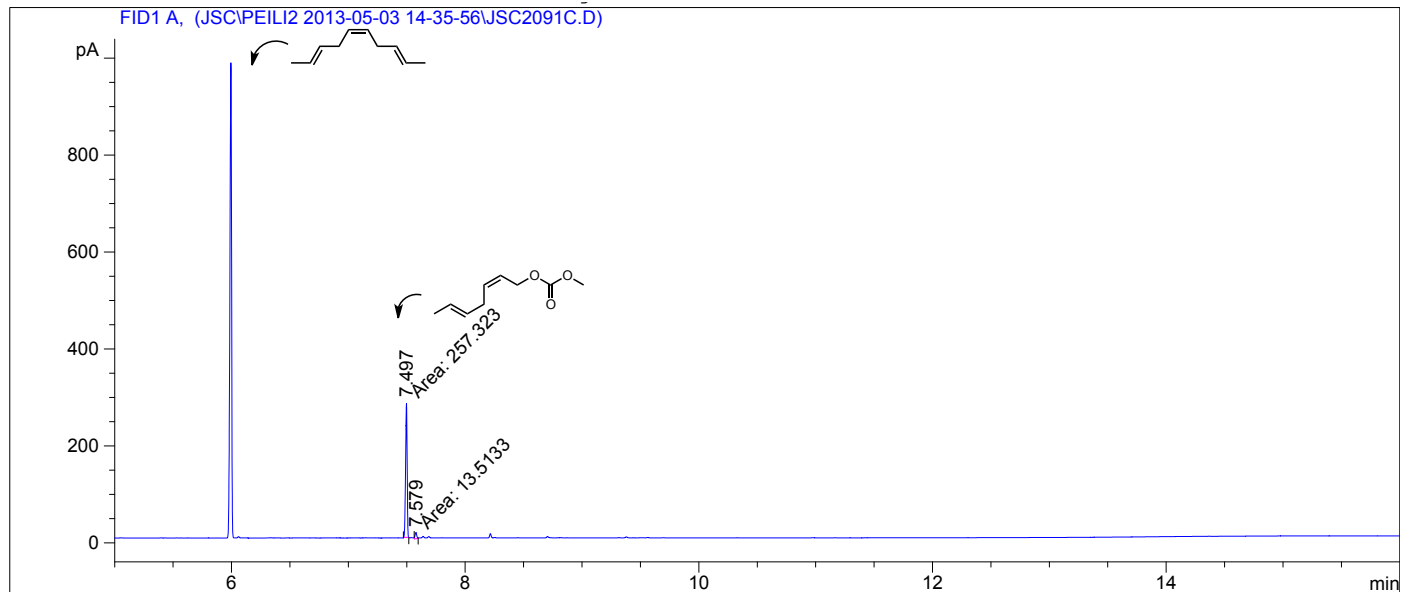

=====  
 Area Percent Report  
 =====

Sorted By : Signal  
 Multiplier : 1.0000  
 Dilution : 1.0000  
 Use Multiplier & Dilution Factor with ISTDs

Signal 1: FID1 A,

| Peak # | RetTime [min] | Type | Width [min] | Area [pA*s] | Height [pA] | Area %   |
|--------|---------------|------|-------------|-------------|-------------|----------|
| 1      | 7.497         | MM   | 0.0154      | 257.32266   | 278.86462   | 95.01052 |
| 2      | 7.579         | MM   | 0.0168      | 13.51332    | 13.40776    | 4.98948  |

Totals :                    270.83598   292.27239

# Compound 12i

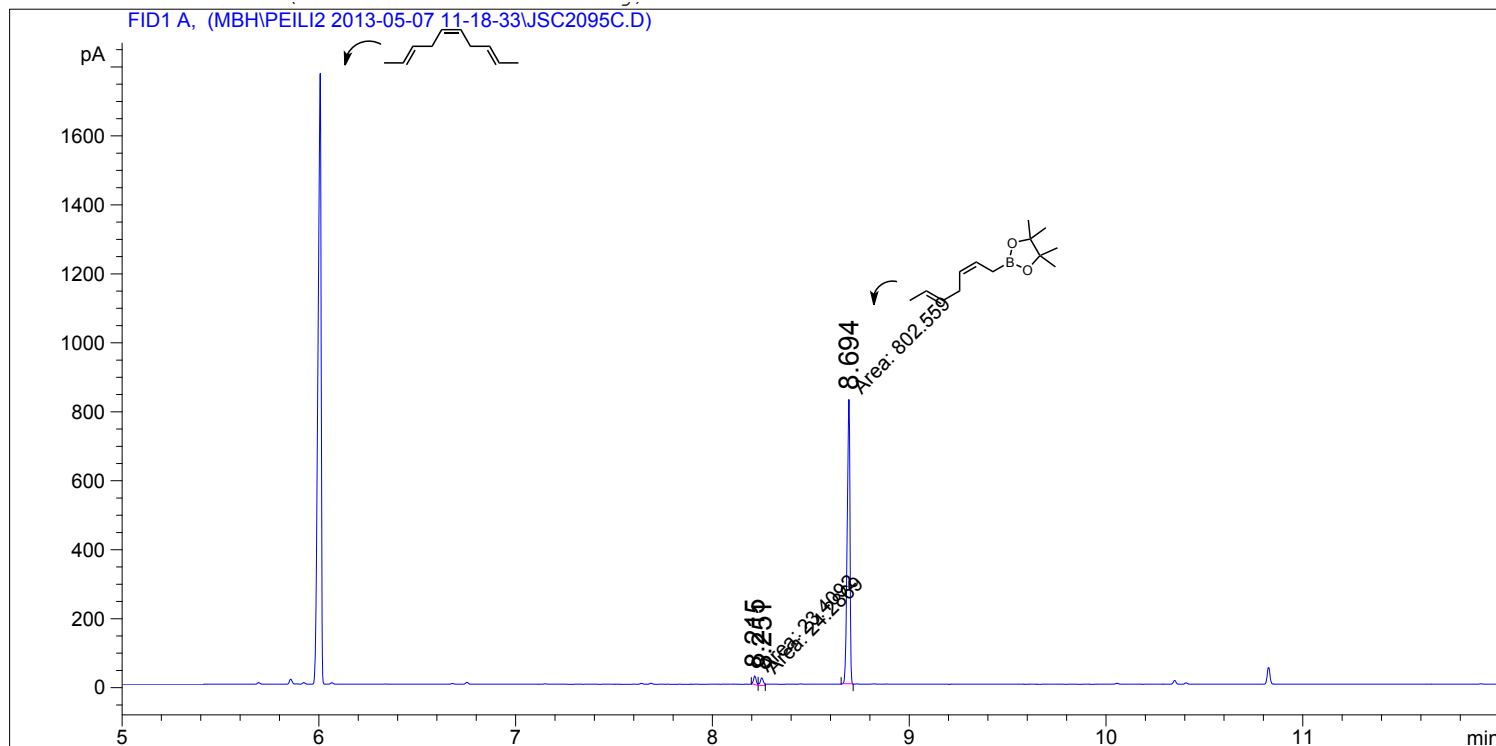

## Area Percent Report

Sorted By : Signal  
 Multiplier : 1.0000  
 Dilution : 1.0000  
 Use Multiplier & Dilution Factor with ISTDs

Signal 1: FID1 A,

| Peak # | RetTime [min] | Type | Width [min] | Area [pA*s] | Height [pA] | Area %   |
|--------|---------------|------|-------------|-------------|-------------|----------|
| 1      | 8.215         | MM   | 0.0155      | 23.40919    | 25.09799    | 2.75320  |
| 2      | 8.251         | MM   | 0.0188      | 24.28689    | 21.54846    | 2.85642  |
| 3      | 8.694         | MM   | 0.0161      | 802.55859   | 829.74054   | 94.39038 |

Totals : 850.25467 876.38698
